# 1 **Efficient and precise single-cell reference atlas mapping with Symphony**

2 Joyce B. Kang<sup>1-5</sup>, Aparna Nathan<sup>1-5</sup>, Nghia Millard<sup>1-5</sup>, Laurie Rumker<sup>1-5</sup>, D. Branch Moody<sup>3</sup>, Ilya  
3 Korsunsky<sup>1-5\*\*</sup>, Soumya Raychaudhuri<sup>1-6\*\*</sup>

4 <sup>1</sup> Center for Data Sciences, Brigham and Women's Hospital, Boston, MA, USA

5 <sup>2</sup> Division of Genetics, Department of Medicine, Brigham and Women's Hospital and Harvard Medical  
6 School, Boston, MA, USA

7 <sup>3</sup> Division of Rheumatology, Inflammation, and Immunity, Department of Medicine, Brigham and  
8 Women's Hospital and Harvard Medical School, Boston, MA, USA

9 <sup>4</sup> Department of Biomedical Informatics, Harvard Medical School, Boston, MA, USA

10 <sup>5</sup> Program in Medical and Population Genetics, Broad Institute of MIT and Harvard, Cambridge, MA,  
11 USA

12 <sup>6</sup> Versus Arthritis Centre for Genetics and Genomics, Centre for Musculoskeletal Research, Manchester  
13 Academic Health Science Centre, The University of Manchester, Manchester, UK

14

15 \*\* These authors jointly supervised this work.

16

17 Correspondence to:

18 Ilya Korsunsky

19 Harvard New Research Building

20 77 Avenue Louis Pasteur

21 Boston, MA 02115

22 [ikorsunskiy@bwh.harvard.edu](mailto:ikorsunskiy@bwh.harvard.edu)

23

24 Soumya Raychaudhuri

25 Harvard New Research Building

26 77 Avenue Louis Pasteur, Suite 250

27 Boston, MA 02115

28 [soumya@broadinstitute.org](mailto:soumya@broadinstitute.org)

29 Ph: 617-525-4484 Fax: 617-525-4488

## 30 Abstract

31 Recent advances in single-cell technologies and integration algorithms make it possible to construct  
32 large, comprehensive reference atlases from multiple datasets encompassing many donors, studies,  
33 disease states, and sequencing platforms. Much like mapping sequencing reads to a reference  
34 genome, it is essential to be able to map new query cells onto complex, multimillion-cell reference  
35 atlases to rapidly identify relevant cell states and phenotypes. We present Symphony, a novel algorithm  
36 for building compressed, integrated reference atlases of  $\geq 10^6$  cells and enabling efficient query  
37 mapping within seconds. Based on a linear mixture model framework, Symphony precisely localizes  
38 query cells within a low-dimensional reference embedding without the need to reintegrate the reference  
39 cells, facilitating the downstream transfer of many types of reference-defined annotations to the query  
40 cells. We demonstrate the power of Symphony by (1) mapping a query containing multiple levels of  
41 experimental design to predict pancreatic cell types in human and mouse, (2) localizing query cells  
42 along a smooth developmental trajectory of human fetal liver hematopoiesis, and (3) harnessing a  
43 multimodal CITE-seq reference atlas to infer query surface protein expression in memory T cells.  
44 Symphony will enable the sharing of comprehensive integrated reference atlases in a convenient,  
45 portable format that powers fast, reproducible querying and downstream analyses.

## 46 Introduction

47 Advancements in single-cell RNA-sequencing (scRNA-seq) have launched an era in which individual  
48 studies can routinely profile  $10^4$ - $10^6$  cells<sup>1-3</sup>, and multimillion-cell datasets are already emerging<sup>4,5</sup>.  
49 Single-cell resolution enables the discovery and refinement of cell states across diverse clinical and  
50 biological contexts<sup>6-11</sup>. To date, most studies redefine cell states from scratch, making it difficult to  
51 compare results across studies and thus hampering reproducibility. Coordinated large-scale efforts,  
52 exemplified by the Human Cell Atlas (HCA)<sup>12</sup>, aim to establish comprehensive and well-annotated  
53 reference datasets comprising millions of cells that capture the broad spectrum of cell states. Building  
54 these reference datasets requires integrating multiple datasets which may have been collected under  
55 different technical and biological conditions. Hence, reference construction requires application of one  
56 of many recently developed single-cell integration algorithms<sup>13-19</sup>. Our group previously developed  
57 Harmony<sup>15</sup>, a fast, accurate, and well-reviewed method<sup>20</sup> that is able to explicitly model complex study  
58 design, a property that makes it suitable for integrating complex datasets into reference atlases<sup>21-24</sup>.  
59 Once such atlases are constructed, powerful mapping algorithms will make it possible to rapidly and  
60 reproducibly map new single-cell datasets onto the reference and automatically annotate them by  
61 transferring information from nearby reference cells.

62 Fast mapping of query cells against a large, stable reference is a well-recognized open problem<sup>25</sup> and  
63 active area of research<sup>18,26,27</sup>. One inefficient but accurate approach to project reference and query cells  
64 into a joint embedding is to integrate both sets of cells together *de novo*, resulting in what might be  
65 considered a “gold standard” embedding. While this is a reasonable approach for relatively small  
66 reference datasets, the strategy is intractable for atlas-sized references with millions of cells. It requires  
67 users to “rebuild” the reference for each analysis, and requires potentially cumbersome and  
68 administratively challenging exchanges of large-scale datasets. Furthermore, it may corrupt the  
69 reference embedding once a reference is carefully constructed and annotated. It is instead preferable  
70 to freeze the reference when mapping new query cells onto it.

71 High-quality reference mapping requires both a fast and accurate mapping algorithm and a framework  
72 to efficiently store a reference dataset. An ideal reference mapping algorithm must meet four key  
73 requirements: handle complex study design in both the reference and query, scale to large datasets,  
74 map with high accuracy, and enable inference of diverse query cell annotations based on reference  
75 cells. Here, we present Symphony, a novel algorithm to compress a large, integrated reference and  
76 map query cells to a precise location in the reference embedding within seconds. Through multiple real-  
77 world dataset analyses, we show that Symphony can enable accurate downstream inference of cell  
78 type, developmental trajectory position, and protein expression, even when the query itself contains  
79 complex confounding technical and biological effects.

## 80 Results

### 81 **Symphony compresses an integrated reference for efficient query mapping**

82 Symphony comprises two main algorithms: reference compression and mapping (**Methods, Fig. S1a**).  
83 Symphony *reference compression* captures and structures information from multiple reference datasets  
84 into an integrated and concise format that can subsequently be used to map query cells (**Fig. 1a-b**).  
85 Symphony builds upon the same linear mixture model framework as Harmony<sup>17</sup>. Briefly, in a low-  
86 dimensional embedding, such as principal component analysis (PCA), the model represents cell states  
87 as soft clusters, in which a cell's identity is defined by probabilistic assignments across one or more  
88 clusters. For *de novo* integration of the reference, cells are iteratively assigned soft cluster  
89 memberships, which are used as weights in a linear mixture model to remove unwanted covariate-  
90 dependent effects. To store the reference efficiently without saving information on individual reference  
91 cells, Symphony computes summary statistics learned in the low-dimensional space (**Fig. 1b,**  
92 **Methods**), returning computationally efficient data structures containing the “minimal reference  
93 elements” needed to map new cells. These include the means and standard deviations used to scale  
94 the genes, the gene loadings from PCA (or another low dimensional projection, e.g. canonical  
95 correlation analysis [CCA]) on the reference cells, soft-cluster centroids from the integrated reference,

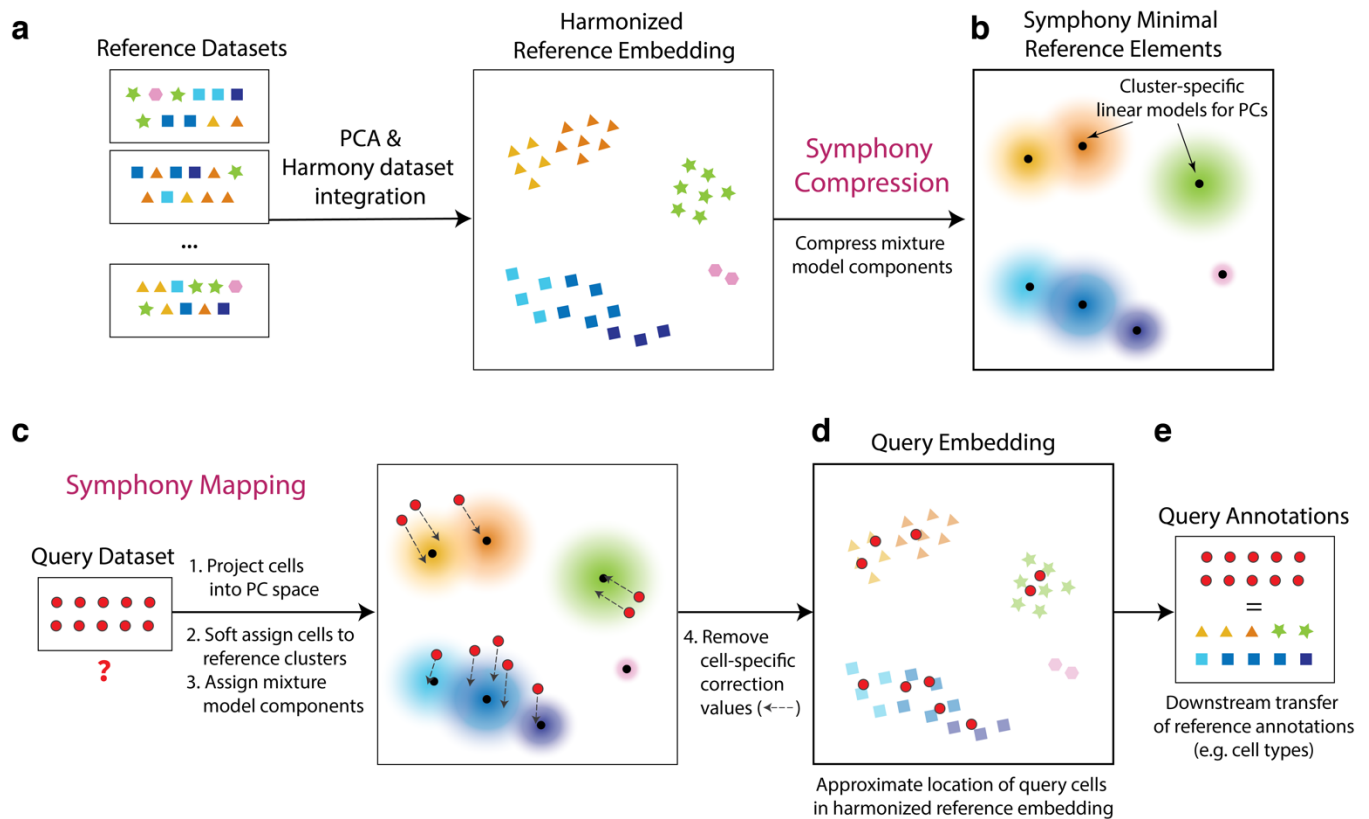

**Figure 1 | Overview of Symphony framework and algorithm.** Symphony comprises two algorithms: Symphony compression (**a-b**) and Symphony mapping (**c-d**). **(a)** To construct a reference, cells from multiple datasets are embedded in a lower-dimensional space (e.g. PCA), in which dataset integration (Harmony) is performed to remove dataset-specific effects. Shape indicates distinct cell types, and color indicates finer-grained cell subtypes or states. **(b)** Symphony compression represents the information captured within the harmonized reference in a concise, portable format based on computing summary statistics for the reference-dependent components of the linear mixture model. Symphony returns the minimal reference elements needed to efficiently map new query cells to the reference. **(c)** Given an unseen query dataset and compressed reference, Symphony mapping localizes the query cells to their appropriate locations within the integrated reference embedding **(d)**. The reference cell locations do not change during mapping. **(e)** The shared Symphony feature embedding can be used for downstream transfer of reference-defined annotations to the query cells.

96 and two “compression terms” (a  $k \times 1$  vector and  $k \times d$  matrix, where  $k$  is the number of clusters and  $d$  is  
97 the dimensionality of the embedding) (**Methods, Supplementary Equations, Fig. S1b**).

98 To map new query cells to the compressed reference, we apply Symphony *mapping*. The algorithm  
99 approximates integration of reference and query cells *de novo* (**Methods**), but uses only the minimal  
100 reference elements to compute the mapping (**Fig. S1c**). First, Symphony projects query gene  
101 expression profiles into the same uncorrected low-dimensional space as the reference cells (e.g. PCs),  
102 using the saved scaling parameters and reference gene loadings (**Fig. 1c**). Second, Symphony  
103 computes soft cluster assignments for the query cells based on proximity to the reference cluster  
104 centroids. Finally, to correct unwanted user-specified technical and biological effects in the query data,  
105 Symphony assumes the soft cluster assignments from the previous step and uses stored mixture model  
106 components to regress out the query batch effects (**Fig. 1d**). Importantly, the reference cell embedding  
107 remains stable during mapping. Embedding the query within the reference coordinates enables  
108 downstream transfer of annotations from reference cells to query cells, including discrete cell type  
109 classifications, quantitative cell states (e.g. position along a trajectory), or expression of missing genes  
110 or proteins (**Fig. 1e**).

### 111 **Symphony approximates *de novo* integration without reintegration of the reference cells**

112 As we demonstrate in the **Methods**, Symphony is equivalent to running *de novo* Harmony integration if  
113 three conditions are met: (I) all cell states represented in the query data set are captured by the  
114 reference dataset, (II) the number of query cells is much smaller than the number of reference cells,  
115 and (III) the query dataset has a design matrix that is independent of reference datasets (i.e. non-  
116 overlapping batches in reference and query). As the scope of available single-cell atlases continues to  
117 grow, it is reasonable to assume that reference datasets are large and all-inclusive, making conditions  
118 (I) and (II) well-supported. Condition (III) is also typically met if the query data was generated in  
119 separate experiments from the reference.

120 To demonstrate that Symphony mapping closely approximates running *de novo* integration on all cells,  
121 we applied Symphony to 20,792 peripheral blood mononuclear cells (PBMCs) assayed with three

122 different 10x technologies: 3'v1, 3'v2, and 5'. We performed three mapping experiments. For each, we  
123 built an integrated Symphony reference from two technologies, then mapped the third technology as a  
124 query. The resulting Symphony embeddings were compared to a gold standard embedding obtained by  
125 running Harmony on all three datasets together. Visually, we found that the Symphony embedding for  
126 each mapping experiment (**Fig. 2a**) closely reproduced the overall structure and cell type information of  
127 the gold standard embedding (**Fig. 2b**). To quantitatively assess the degrees of dataset mixing we use  
128 the Local Inverse Simpson's Index (LISI)<sup>26-30</sup> metric; higher LISI scores correspond to better mixing of  
129 cells across batches. LISI scores in Symphony embeddings (mean LISI 2.16, 95% CI [2.16, 2.17]) and  
130 *de novo* integration embeddings (mean LISI 2.14, 95% CI [2.13, 2.15]) were nearly identical (**Fig. 2c**,  
131 **Methods**).

132 To directly assess similarity of the local neighborhood structures, we computed the correlation between  
133 the local neighborhood adjacency graphs generated by Symphony and *de novo* integration. We define  
134 a new metric called k-nearest-neighbor correlation (k-NN-corr), which quantifies how well the local  
135 neighborhood structure in a given embedding is preserved in an alternative embedding by looking at  
136 the correlation of neighbor cells sorted by distance (**Fig. S2a-e**). Anchoring on each query cell, we  
137 calculate (1) the pairwise similarities to its *k* nearest reference neighbors in the gold standard  
138 embedding and (2) the similarities between the same query-reference neighbor pairs in the alternate  
139 embedding (**Methods**), then calculate the Spearman correlation between (1) and (2). k-NN-corr ranges  
140 from -1 to +1, where +1 indicates a perfectly preserved sorted ordering of neighbors. We find that for  
141 *k*=500, the Symphony embeddings produce a k-NN-corr >0.4 for 77.3% of cells (and positive k-NN-corr  
142 for 99.9% of cells), demonstrating that Symphony not only maps query cells to the correct broad cluster  
143 but also preserves the distance relationships between nearby cells in the same local region (**Fig. 2d**).  
144 As a comparison, we calculated k-NN-corr for a simple PC projection of the query cells (with no  
145 correction step) using the original reference gene loadings prior to integration and observed  
146 significantly lower correlations (Wilcoxon signed-rank  $p < 2.2e-16$ ), with k-NN-corr >0.4 for 39.9% of cells  
147 (**Fig. S2f**).

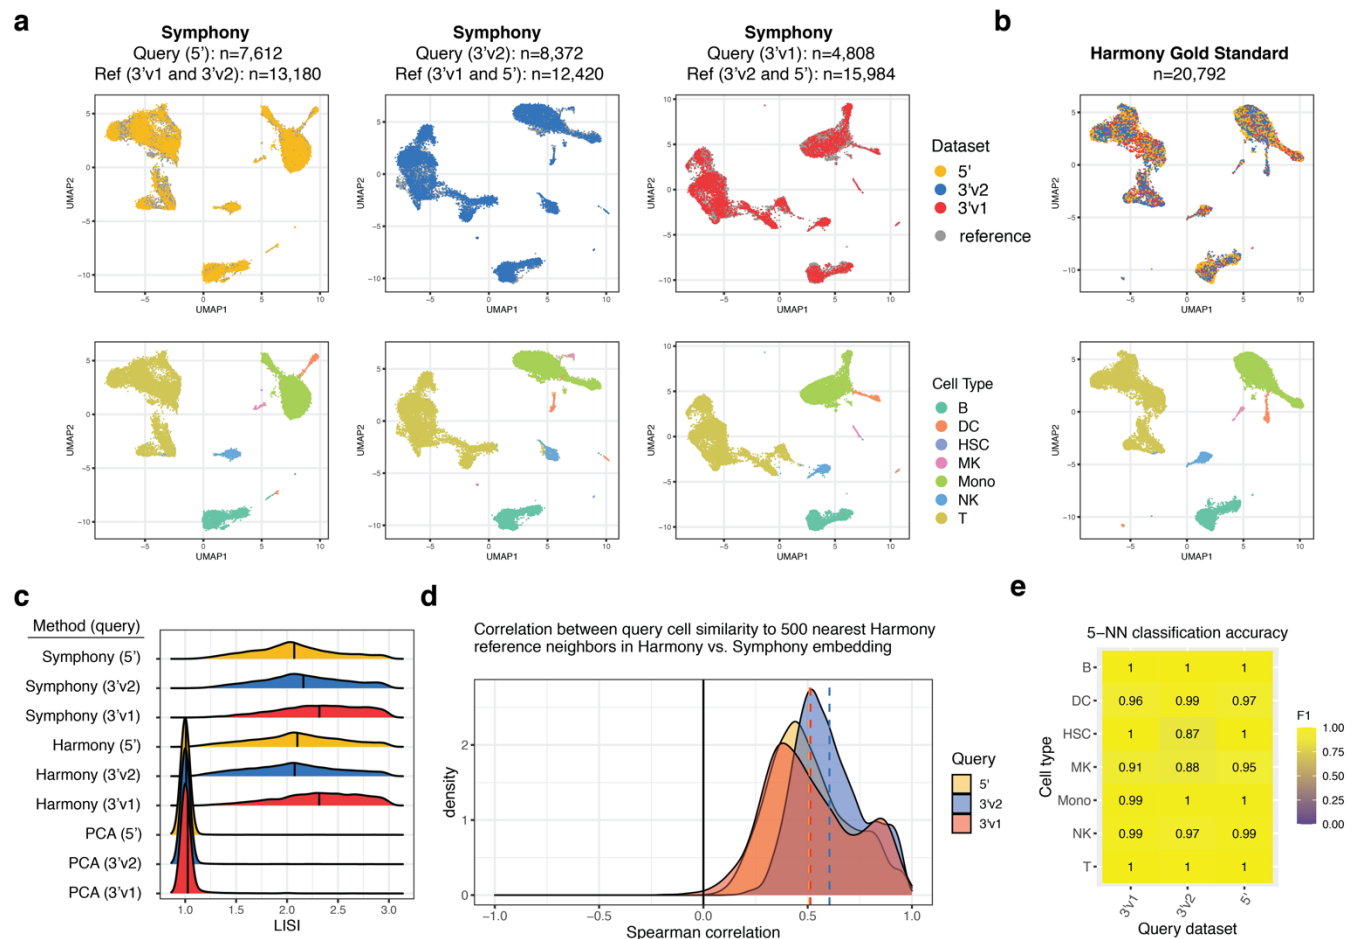

**Figure 2 | Symphony approximates *de novo* integration without reintegration of the reference.** Three PBMC datasets were sequenced with different 10x protocols: 5' (yellow, n=7,697 cells), 3'v2 (blue, n=8,380 cells), and 3'v1 (red, n=4,809 cells). We ran Symphony three times, each time mapping one dataset onto the other two. **(a)** Symphony embeddings generated across the three mapping experiments (columns). Top row: cells colored by query (yellow, blue, or red) or reference (gray), with query cells plotted in front. Bottom row: cells colored by cell type: B cell (B), dendritic cell (DC), hematopoietic stem cell (HSC), megakaryocyte (MK), monocyte (Mono), natural killer cell (NK), or T cell (T), with query cells plotted in front. **(b)** For comparison, gold standard *de novo* Harmony embedding colored by dataset (top) and cell type (bottom). **(c)** Distribution of LISI scores for query cells in the Symphony embeddings, gold standard, and a standard PCA pipeline on all cells. **(d)** Distribution of k-NN-corr (Spearman correlation between the similarities between the neighbor-pairs in the Harmony embedding and the similarities between the same neighbor-pairs in the Symphony embedding) across query cells for k=500, colored by query dataset. **(e)** Classification accuracy as measured by cell type F1 scores for downstream query cell type annotation using 5-NN on the Symphony embedding.



## 148 **Symphony enables accurate cell type classification**

149 If Symphony is effective, then cells should be mapped close to cells of the same cell type, enabling  
150 accurate cell type classification. To test this, we performed post-mapping query cell type classification  
151 in the 10x PBMCs example from above. We used a 5-NN classifier to annotate query cells across 7 cell  
152 types based on the nearest reference cells in the harmonized embedding and compared the predictions  
153 to the ground truth labels assigned *a priori* with lineage-specific marker genes (**Methods, Table S2**).  
154 Across all three experiments, predictions using the Symphony embeddings achieved 99.5% accuracy  
155 overall, with a median cell type F1-score (harmonic mean of precision and recall, ranging from 0 to 1) of  
156 0.99 (**Fig. 2e, Table S3**). This indicates that Symphony appropriately localizes query cells in  
157 harmonized space to enable the accurate transfer of cell type labels.

158 Automatic cell type classification represents an open area of research<sup>28-32</sup>. Existing supervised  
159 classifiers assign a limited set of labels to new cells based on training data and/or marker genes. To  
160 benchmark Symphony-powered downstream inference against existing classifiers, we followed the  
161 same procedure as a benchmarking analysis in Abdelaal et al. (2019)<sup>28</sup>. The benchmark compared 22  
162 cell type classifiers on the Pbmcbench dataset consisting of two PBMC samples sequenced using 7  
163 different protocols<sup>33</sup>. For each protocol train-test pair (42 experiments) and donor train-test pair  
164 (additional 6 experiments) (**Methods**), we built a Symphony reference from the training dataset then  
165 mapped the test dataset. We used the resulting harmonized feature embedding to predict query cell  
166 types using three downstream models: 5-NN, SVM with radial kernel, and multinomial logistic  
167 regression. The Symphony-based classifiers achieve consistently high cell type F1-scores (average  
168 median F1 of 0.79-0.83) comparable to the top three supervised classifiers for this benchmark  
169 (scmapcell, singleCellNet, and SCINA, average median F1 of 0.77-0.83) (**Fig. S3a**). Notably, as  
170 discussed in Abdelaal et al., the median F1-score alone can be misleading given that some classifiers  
171 (including SCINA) leave low-confidence cells as “unclassified”, whereas we used Symphony to assign a  
172 label to every cell. This benchmark is also arguably suboptimal in that the reference in each experiment  
173 is comprised of a single dataset (no reference integration involved).

## 174 **Symphony maps against a large reference within seconds**

175 To demonstrate scalability to large reference atlases, we evaluated Symphony's computational speed.  
176 We downsampled a large memory T cell dataset<sup>34</sup> to create benchmark reference datasets with 20,000,  
177 50,000, 100,000, 250,000, and 500,000 cells (from 12, 30, 58, 156, and 259 donors, respectively).  
178 Against each reference, we mapped three different-sized queries: 1,000, 10,000, and 100,000 cells  
179 (from 1, 6, and 64 donors) and measured total elapsed runtime (**Fig. S4, Table S4**). The speed of the  
180 reference building process is comparable to that of running *de novo* integration since they both start  
181 with expression data and require a full pipeline of scaling, PCA, and Harmony integration. However, a  
182 reference need only be built and saved once in order to map all subsequent query datasets onto it. For  
183 instance, initially building a 500,000-cell reference with Symphony took 5,163 seconds (86.1 min) and  
184 mapping a subsequent 10,000-cell query onto it took only 0.99 secs, compared to 4,806 secs (80.1  
185 mins) for *de novo* integration on all cells. Symphony offers a 5000x speedup in this application. These  
186 results show that Symphony scales efficiently to map against multimillion-cell references, enabling it to  
187 power potential web-based queries within seconds.

188 Importantly, Symphony mapping time does not depend on the number of cells or batches in the  
189 reference since the reference cells are modeled post-batch correction (**Methods**); however, it does  
190 depend on the reference complexity (number of centroids  $k$  and dimensions  $d$ ) and number of query  
191 cells and batches (**Table S4**) since the query mapping algorithm solves for the query batch coefficients  
192 for each of the reference-defined clusters.

## 193 **Mapping a query dataset with multi-level experimental design in human and mouse** 194 **pancreas**

195 Symphony is designed to handle query datasets with multiple batches, technologies, individuals, or  
196 other structures. To demonstrate, we used Symphony in a scenario in which both the reference and the  
197 query have complex experimental designs (**Fig 3a**). The reference contained 6,177 pancreatic islet  
198 cells from 32 human donors across four independent studies<sup>35-38</sup>, each employing a different plate-  
199 based scRNA-seq technology (CEL-seq, CEL-seq2, Smart-seq2, and Fluidigm C1; **Fig 3b**). We

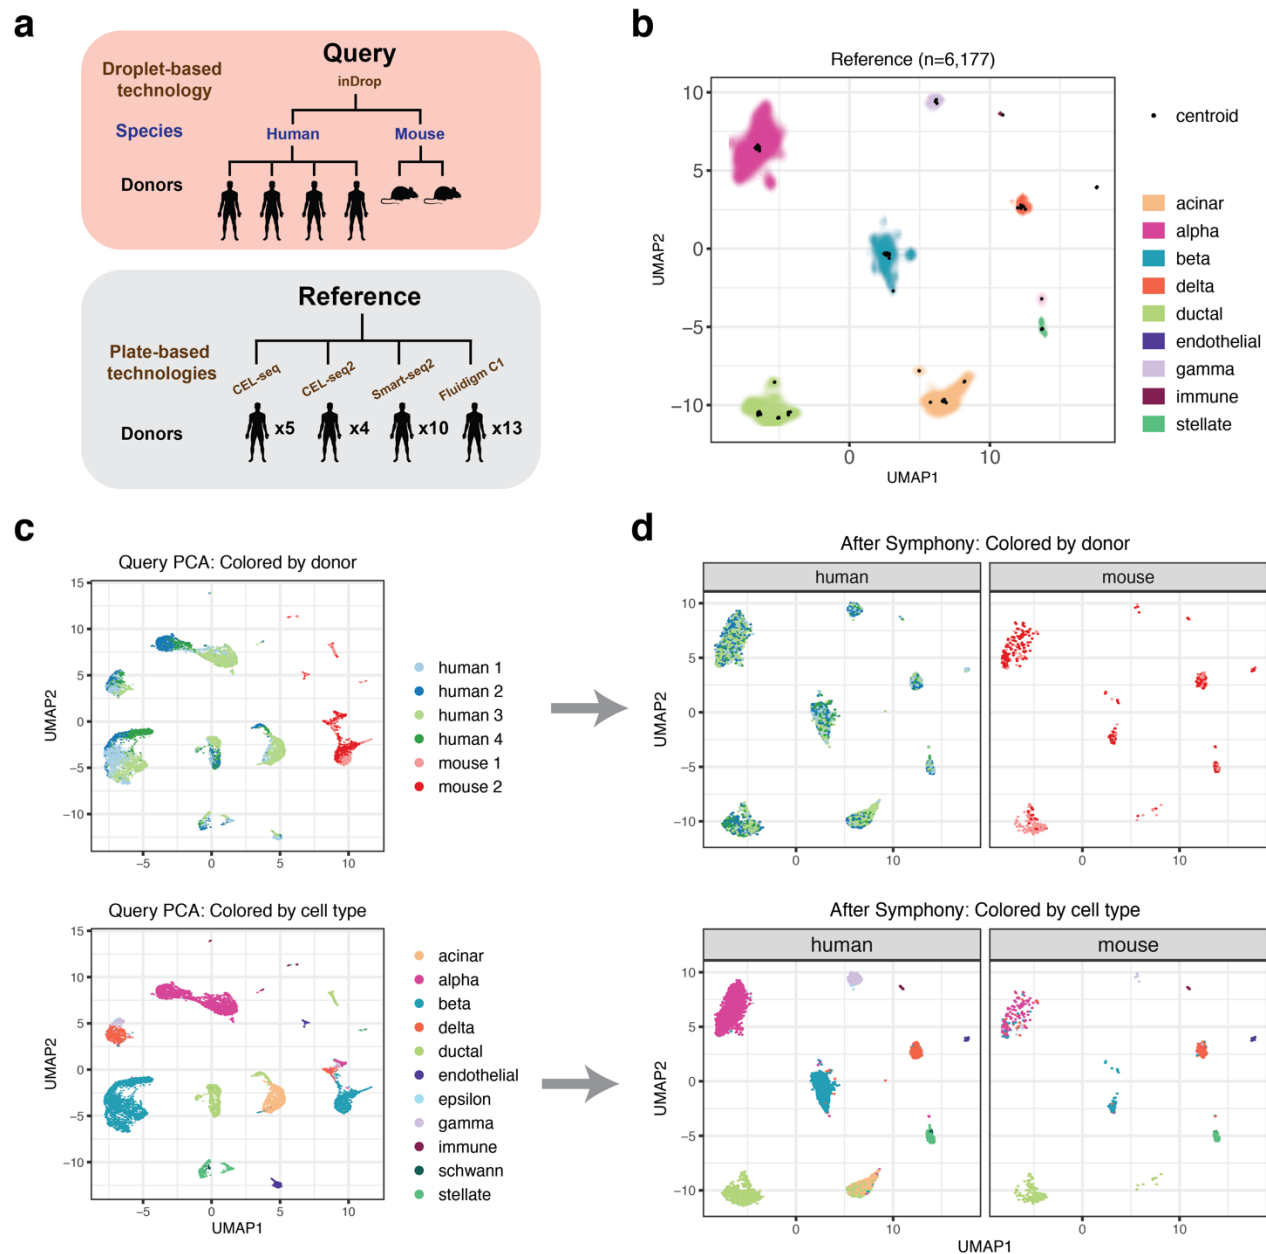

**Figure 3 | Symphony maps pancreas cells with multi-level query.** (a) Symphony mapping can model and remove multiple potentially nested sources of batch variation in the query, such as technology, species, and donor. In this example, the query dataset ( $n=10,455$  cells, from 4 human donors and 2 mouse donors) was sequenced on a new technology (inDrop) previously unseen in the reference. (b) A Symphony reference ( $n=6,177$  cells, 32 donors) was built from four human pancreas datasets, each assayed using different technologies, and broad cell types were annotated using canonical marker genes. Contour fill represents density of reference cells. Black points represent soft-cluster centroids in the Symphony mixture model. (c) Without mapping, a standard PCA pipeline shows that query cells exhibit strong species and donor effects. (d) Query cells are mapped against the reference by simultaneously removing the effect of technology, species, and donor in the query such that the cells group by cell type with mixing between species and among donors. Top row colored by donor; bottom row colored by cell type as previously defined by Baron et al. (2016).

200 integrated across donors and technologies, defined clusters, and manually annotated cell types using  
201 cluster-specific marker genes (**Methods, Table S5**). The query contained 8,569 pancreatic islet cells  
202 from 4 human donors and 1,866 cells from 2 mice, all profiled with inDrop, a droplet-based scRNA-seq  
203 technology absent in the reference<sup>39</sup>.

204 PCA of the query dataset alone revealed large sources of variation from both species and donor  
205 identity (**Fig. 3c**). Symphony mapped the multi-level droplet-based query onto the plate-based  
206 reference by simultaneously modeling and removing the effects of technology, species, and donor  
207 within the query (**Fig. 3d**). By removing all three nested sources of variation, we accurately predicted  
208 query cell types with a 5-NN classifier in the harmonized embedding: median cell type F1-scores of  
209 0.97 (overall accuracy 96.4%) for human and median cell type F1 of 0.94 (overall accuracy 86.4%) for  
210 mouse cells, with ground truth labels defined by the original publication<sup>39</sup> (**Table S6**). By mapping  
211 against a reference, Symphony is able to overcome strong species effects and simultaneously map  
212 analogous cell types between mouse and human.

### 213 **Localizing query cells along a reference-defined trajectory of human fetal liver** 214 **hematopoiesis**

215 A successful mapping method should position cells not only within cell type clusters but also along  
216 smooth transcriptional gradients, commonly used to model differentiation and activation processes over  
217 time (**Fig. 4a**). To test Symphony in a gradient mapping context, we built and mapped to a reference  
218 atlas profiling human fetal liver hematopoiesis, containing 113,063 liver cells from 14 donors spanning  
219 7-17 post-conceptual weeks of age and 27 author-defined cell types, sequenced with 10x 3' chemistry  
220 (**Fig. 4b, Fig. S5a**)<sup>40</sup>. Trajectory analysis of immune populations with the force directed graph (FDG)  
221 algorithm<sup>40</sup> highlights relationships among progenitor and differentiated cell types (**Fig. 4c**). Notably, the  
222 hematopoietic stem cell and multipotent progenitor population branches into three major trajectories,  
223 representing the lymphoid, myeloid, and megakaryocyte-erythroid-mast (MEM) lineages. This reference  
224 contains two forms of annotation for downstream query inference: discrete cell types and positions  
225 along differentiation gradients.

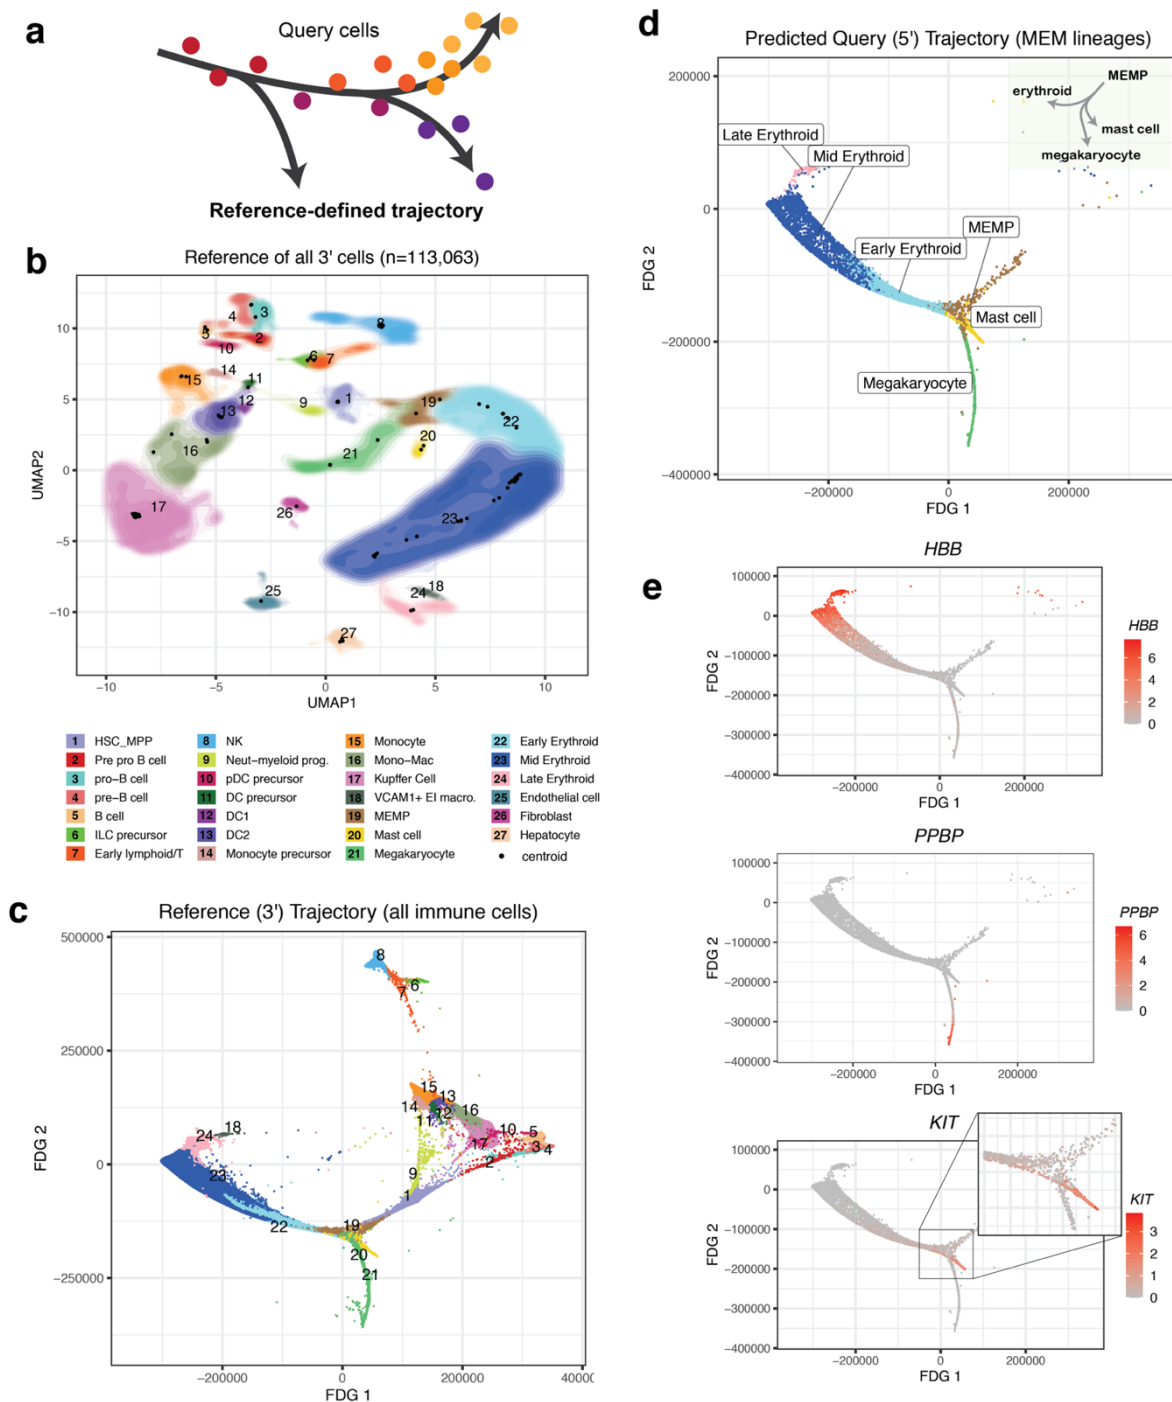

**Figure 4 | Localizing query cells along a trajectory of fetal liver hematopoiesis.** (a) Symphony can precisely place query cells along a reference-defined trajectory. The reference (n=113,063 cells, 14 donors) was sequenced using 10x 3' chemistry, and the query (n=25,367 cells, 5 donors) was sequenced with 10x 5' chemistry. (b) Symphony reference colored by cell types as defined by Popescu et al. (2019). Contour fill represents density of cells. Black points represent soft-cluster centroids in the Symphony mixture model. (c) Reference developmental trajectory of 3'-sequenced immune cells (FDG coordinates obtained from original authors). Query cells in the MEM lineages (n=5,141 cells) were mapped against the reference and query coordinates along the trajectory were predicted with 10-NN (d). The inferred query trajectory preserves branching within the MEM lineages, placing terminally differentiated states on the ends. (e) Expression of lineage marker genes (*PPBP* for megakaryocytes, *HBB* for erythroid cells, and *KIT* for mast cells). Cells colored by log-normalized expression of gene.

226 We mapped a query consisting of 21,414 new cells from 5 of the original 14 donors, sequenced with  
227 10x 5' chemistry. We first inferred query cell types with k-NN classification (**Methods**) and confirmed  
228 accurate cell type assignment based on the authors' independent query annotations<sup>40</sup> (median cell type  
229 F1=0.92 across 14 held-out donor experiments within 3' dataset only, median cell type F1=0.83 for the  
230 5'-to-3' experiment; **Fig. S6**). To evaluate query trajectory inference, we used the Symphony joint  
231 embedding to position query cells from the MEM lineage (n=5,141) in the reference-defined trajectory  
232 by averaging the 10 nearest reference cell FDG coordinates. The inferred query trajectory (**Fig. 4d**)  
233 recapitulated known branching from MEM progenitors (MEMPs, brown) into distinct megakaryocyte  
234 (green), erythroid (blue, pink), and mast cell (yellow) lineages. Moreover, transitions from MEMPs to  
235 differentiated types were marked by gradual changes in canonical marker genes (**Fig. 4e**): *PPBP* for  
236 megakaryocytes, *HBB* for erythrocytes, and *KIT* for mast cells. These gradual expression patterns are  
237 consistent with correct placement of query cells along differentiation gradients.

### 238 **Inferring query surface protein marker expression by mapping to a reference assayed** 239 **with CITE-seq**

240 Recent technological advances in multimodal single-cell technologies (e.g., CITE-seq) make it possible  
241 to simultaneously measure mRNA and surface protein expression from the same cells using  
242 oligonucleotide-tagged antibodies<sup>41,42</sup>. With Symphony, we can construct a reference from these data,  
243 map query cells from experiments that measure only mRNA expression, and infer surface protein  
244 expression for the query cells to expand possible analyses and interpretations (**Fig. 5a**).

245 To demonstrate this, we used a CITE-seq dataset that measures the expression of whole-transcriptome  
246 mRNA and 30 surface proteins on 500,089 peripheral blood memory T cells from 271 samples<sup>43</sup>. We  
247 leveraged both mRNA and protein features to build a multimodal reference from 80% of samples  
248 (n=217) and map the remaining 20% of samples (n=54). Instead of using PCA, which is best for one  
249 modality<sup>44</sup>, we used canonical correlation analysis (CCA) to embed reference cells into a space that  
250 leverages both. Specifically, CCA constructs a pair of correlated low-dimensional embeddings, one for  
251 mRNA and one for protein features, each with a linear projection function akin to gene loadings in PCA.

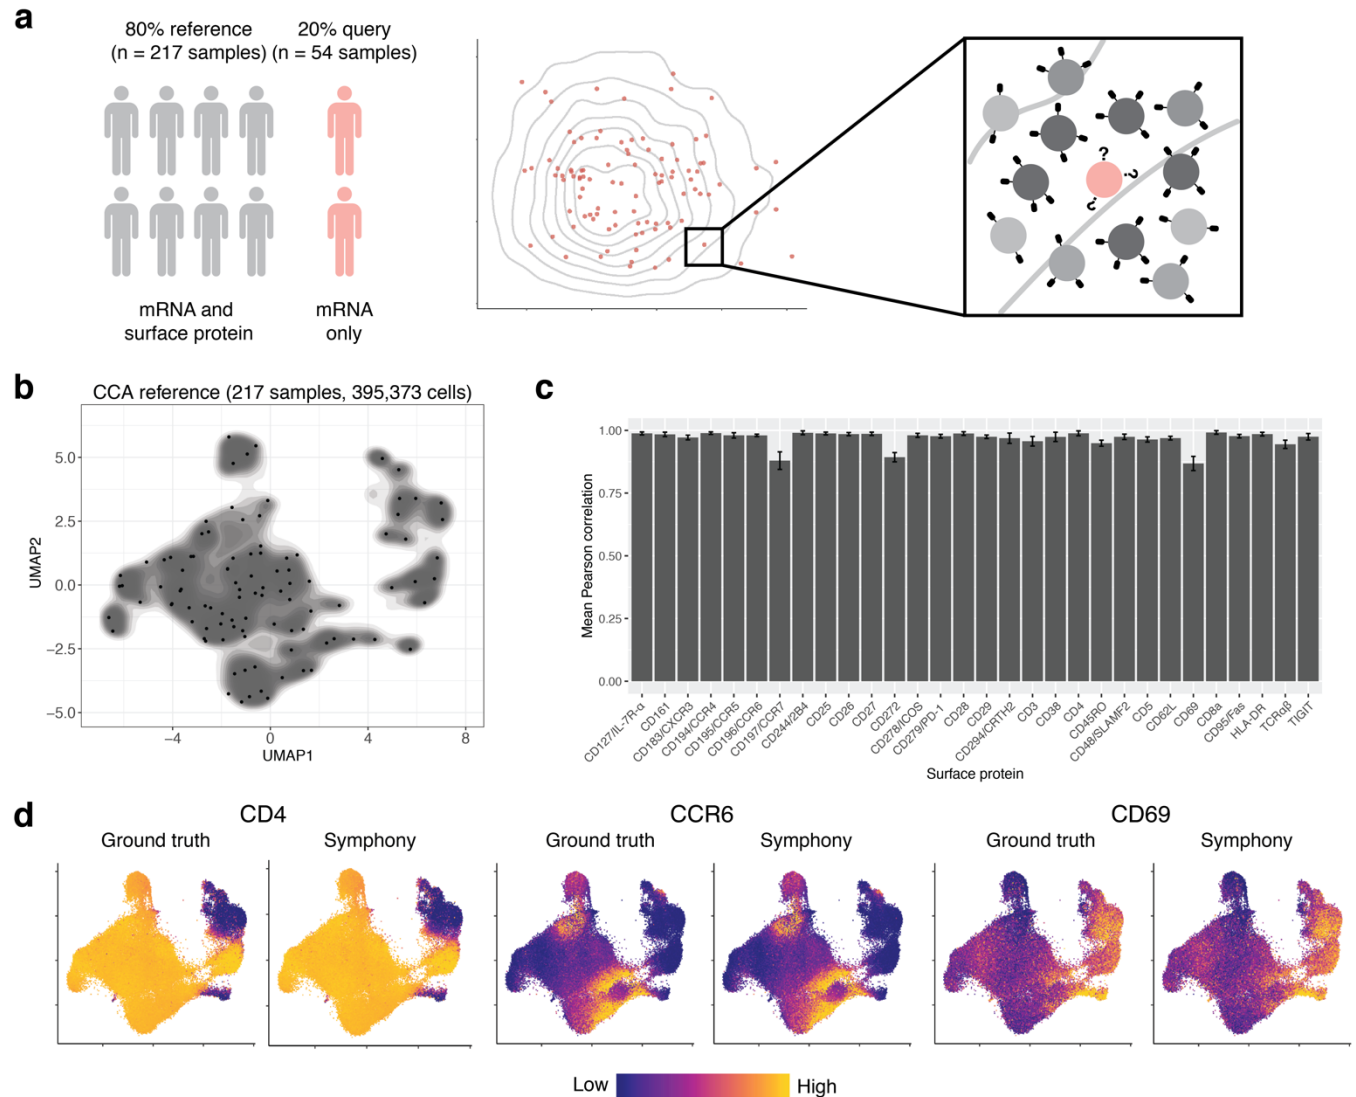

**Figure 5 | Mapping onto a multimodal reference to infer query surface protein expression in memory T cells.** (a) Schematic of multimodal mapping experiment. The dataset was divided into training and test sets (80% and 20% of samples, respectively). The training set was used to build a Symphony reference, and the test set was mapped onto the reference to predict surface protein expression in query cells (pink) based on 50-NN reference cells (gray). (b) Symphony reference built from mRNA/protein CCA embedding. Contour fill represents density of reference cells. Black points represent soft-cluster centroids in the Symphony mixture model. (c) We measured the accuracy of protein expression prediction with the Pearson correlation between predicted and ground truth expression for each surface protein across query cells in each donor. Bar height represents the average per-donor correlation for each protein, and error bars represent standard deviation. (d) Ground truth and predicted expression of CD4, CCR6, and CD69 based on CCA reference. Ground truth is the 50-NN-smoothed expression measured in the CITE-seq experiment. Colors are scaled independently for each marker from minimum (blue) to maximum (yellow) expression.

252 We corrected reference batch effects in CCA space with Harmony and built a Symphony reference  
253 (**Fig. 5b**), saving the gene loadings for the CCA embedding from mRNA features. Then, we mapped  
254 the held-out query using only mRNA expression to mimic a unimodal scRNA-seq experiment, reserving  
255 the measured query protein expression as a ground truth for validation. We accurately predicted the  
256 surface protein expression of each query cell using the 50-NN average from the reference cells in the  
257 harmonized embedding. For all proteins, we found strong concordance between predicted and (50-NN  
258 smoothed) measured expression (Pearson  $r$ : 0.88-0.99, **Fig. 5c,d**). For all but three proteins, we  
259 achieved comparable results with as few as 5 or 10 nearest neighbors (**Fig. S7a**).

260 We note that it is also possible to conduct the same analysis with a unimodal PCA-based reference  
261 built from the cells' mRNA expression only. This approach has slightly worse performance for some  
262 proteins (Pearson  $r$ : 0.65-0.97, **Fig. S7b-d**), demonstrating that a reference built jointly on both mRNA  
263 and protein permits better inference of protein expression than an mRNA-only reference, which is  
264 consistent with previous observations that mRNA expression is not fully representative of protein  
265 expression<sup>41,42</sup>. This analysis highlights how users can start with a low-dimensional embedding other  
266 than PCA, such as CCA, to better capture rich multimodal information in the reference.

## 267 Discussion

268 We frame reference mapping as a specialized case of integration, between one dataset and a second  
269 larger, more comprehensive, and previously integrated dataset. Because the reference is already  
270 integrated, it is natural to use the same mathematical framework from the integration to perform  
271 mapping. For instance, the scArches<sup>26</sup> algorithm uses an autoencoder-based framework to map to  
272 references built with autoencoder-based integration algorithms trVAE<sup>46</sup> and CVAE. Similarly, Symphony  
273 uses the mixture modeling framework to map to references built with Harmony mixture modeling  
274 integration. Symphony compresses the reference by extracting relevant reference-derived parameters  
275 from the mixture model to map query cells in seconds. With this compression, references can be  
276 distributed without the need to share raw expression data or donor-level metadata, which enables data  
277 privacy<sup>28-32</sup>. Symphony compression greatly reduces the size of a reference dataset: for the memory T



278 cell dataset of 500,089 cells, the raw expression matrix is 8.9 GB, whereas the Symphony minimal  
279 reference elements are 1.3 MB.

280 Useful reference atlases contain annotations not present in the query, such as cell type labels (**Fig. 3**),  
281 trajectory coordinates (**Fig. 4**), or multimodal measurements (**Fig. 5**). Transfer of these annotations  
282 from reference to query is an open area of research that includes algorithms for automated cell type  
283 classification<sup>47</sup>. We approach annotation transfer in two steps. We first learn a predictive model in the  
284 reference embedding, then map query cells and use their reference coordinates to predict query  
285 annotations. In this two-step approach, Symphony mapping provides a feature space but is otherwise  
286 independent from the choice of downstream inference model. In PBMC type prediction (**Fig. S3**), we  
287 used Symphony embeddings to train multiple competitive classifiers: k-NN, SVM, and logistic  
288 regression. In our analyses, we were encouraged to find that a simple k-NN classifier can achieve high  
289 performance with only 5-10 neighbors. In practice, users can choose more complex inference models if  
290 it is warranted for certain annotation types. Moreover, we expect prediction results to improve with more  
291 accurate and reproducible annotation methods, such as consistent cell type taxonomies provided by  
292 the Cell Ontology<sup>48</sup> project and better modeling of multimodal expression data<sup>17</sup>.

293 We defined three conditions under which Symphony and *de novo* integration with Harmony yield  
294 equivalent results. In subsequent examples, we showed that Symphony still performs well when the last  
295 two conditions are relaxed. The pancreas query contains more cells than its reference (**condition II**),  
296 while the liver hematopoiesis reference and query overlap in donors (**condition III**). Condition I, which  
297 requires comprehensive cell type coverage in the reference, is less flexible. When the query contains a  
298 brand new cell type, it will be aligned to its most transcriptionally similar reference cluster. Note that  
299 condition I only pertains to cell types and not clinical and biological contexts. For instance, we  
300 successfully mapped mouse pancreas query to an entirely human pancreas reference (**Fig. 3**),  
301 because the same pancreatic cell types are shared in both species. Mapping novel cell types is a  
302 current limitation and important direction for future work. For now, we advise users interested in novel  
303 cell type discovery to supplement a Symphony analysis with *de novo* analyses of the query alone.

304 Instead of one monolithic reference, we expect the proliferation of multiple, well-annotated specialized  
305 references. For instance, the memory T cell reference (**Fig. 5**) will be useful to annotate fine-grained T  
306 cell states, while an unsorted PBMC reference (**Fig. 2**) would better suit annotation of more diverse  
307 immune populations. Similarly, a reference with only healthy individuals is useful for annotation of cell  
308 types, while a reference with both healthy and diseased individuals is useful for annotation of cell types  
309 and pathological cell states.

310 As large-scale tissue and whole-organism single-cell reference atlases become available in the near  
311 future, Symphony will enable investigators to leverage the rich information in these references to  
312 perform integrative analyses and rapidly transfer reference coordinates and diverse annotations to new  
313 datasets.

## 314 Methods

### 315 **1. Symphony**

#### 316 1.1 Symphony overview

317 The goal of single-cell reference mapping is to embed newly assayed query cells into an existing  
318 comprehensive reference atlas, facilitating the automated transfer of annotations from the reference to  
319 the query. The optimal mapping method needs to be able to operate at various levels of resolution,  
320 capture continuous intermediate cell states, and scale to multimillion cells<sup>17</sup>. Consider a scenario in  
321 which we wish to map a query of  $m$  cells against reference datasets with  $n$  cells, where  $m \ll n$ .  
322 Unsupervised integration of measurements across donors, studies, and technological platforms is the  
323 standard way to compare single cell datasets and identify cell types. Hence, a “gold standard”  
324 reference mapping strategy might be to run Harmony integration on all  $m+n$  cells *de novo*. However,  
325 this approach is impractical because it is cumbersome and time-intensive to process all the cell-level  
326 data for the reference datasets every time a user wishes to reharmonize it with a query. Instead, we  
327 envision a pipeline where a reference atlas need only be carefully constructed and integrated once, and  
328 all subsequent queries can be rapidly mapped into the same stable reference embedding.

329 Symphony is a reference mapping method that efficiently places query cells in their precise location  
330 within an integrated low-dimensional embedding of reference cells, approximating *de novo*  
331 harmonization without the need to reintegrate the reference cells. Symphony is comprised of two  
332 algorithms: reference compression and mapping. Expanding upon the linear mixture model framework  
333 introduced in Harmony<sup>18</sup>, Symphony compression takes in an integrated reference and faithfully  
334 compresses it by capturing the components of the model into efficient data structures. The output of  
335 reference compression is the minimal set of elements needed for mapping (**Fig. S1b**). The Symphony  
336 mapping algorithm takes as input a new query dataset as well as minimal reference elements and  
337 returns the appropriate locations of the query cells within the integrated embedding (**Fig. S1c**).

338 Once a harmonized reference is constructed and compressed using Symphony, subsequent mapping  
339 of query cells executes within seconds (**Fig. S4**). Efficient implementations of Symphony are available  
340 as part of an R package at <https://github.com/immunogenomics/symphony>, along with several  
341 precomputed references constructed from public scRNA-seq datasets. The following sections introduce  
342 the Symphony model, then describes Symphony compression and mapping in terms of the underlying  
343 data structures and algorithms. We also provide **Supplementary Equations** containing more detailed  
344 derivations for reference compression terms.

### 345 *Glossary*

346 We define all symbols for data structures used in the discussion of Symphony below, including their  
347 dimensions and possible values. Dimensions are in terms of the following parameters:

- 348 •  $n$ : the number of reference cells
- 349 •  $m$ : the number of query cells
- 350 •  $N$ : the total number of cells ( $n + m$ )
- 351 •  $g$ : the number of genes in the reference after any gene selection
- 352 •  $d$ : the dimensionality of the embedding (e.g. PCs).  $d$  applies to both reference and query.
- 353 •  $b$ : the number of batches in the reference
- 354 •  $c$ : the number of batches in the query
- 355 •  $k$ : the number of clusters in the mixture model for reference integration (representing latent cell  
356 states)

### 357 **Reference-related symbols:**

|                                      |                                                                                                                                                                                                                                   |
|--------------------------------------|-----------------------------------------------------------------------------------------------------------------------------------------------------------------------------------------------------------------------------------|
| $G_r \in \mathbb{R}^{g \times n}$    | Input reference gene expression matrix, prior to scaling.                                                                                                                                                                         |
| $G_{rs} \in \mathbb{R}^{g \times n}$ | Scaled reference gene expression matrix.                                                                                                                                                                                          |
| $X_r \in \{0, 1\}^{b \times n}$      | One-hot design matrix assigning reference cells (columns) to batches (rows).                                                                                                                                                      |
| $X'_r \in \{0\}^{c \times n}$        | Zero matrix assigning reference cells (columns) to <i>query</i> batches (rows). All values are 0 because reference cells do not belong to query batches. This term is used in the derivation for the reference compression terms. |

|                                                |                                                                                                                                                            |
|------------------------------------------------|------------------------------------------------------------------------------------------------------------------------------------------------------------|
| $\mu \in \mathbb{R}^{g \times 1}$              | Reference gene means used to center each gene for PCA.                                                                                                     |
| $\sigma \in \mathbb{R}^{g \times 1}$           | Reference gene standard deviations used to scale each gene for PCA.                                                                                        |
| $U \in \mathbb{R}^{g \times d}$                | Gene loadings from the original PCA (before Harmony integration).                                                                                          |
| $Z_r \in \mathbb{R}^{d \times n}$              | Original (non-harmonized) PC embedding for reference cells.                                                                                                |
| $\hat{Z}_r \in \mathbb{R}^{d \times n}$        | Integrated embedding for reference cells in harmonized PC (hPC) space, as output by Harmony.                                                               |
| $R_r \in [0, 1]^{k \times n}$                  | Soft cluster assignment of reference cells (columns) to clusters (rows), as output by Harmony. Each column is a probability distribution that sums to 1.   |
| $Y_{cos} \in \mathbb{R}^{d \times k}$          | Cluster centroid locations in the harmonized embedding, L2 normalized.                                                                                     |
| $B_r \in \mathbb{R}^{k \times (1+b) \times d}$ | 3D tensor of the estimated parameters (betas and intercepts) of the linear mixture model for each of $k$ clusters for the reference cells.                 |
| $N_r \in \mathbb{R}^{k \times 1}$              | First reference compression term. Vector containing the size of each of the $k$ clusters, effectively the number of reference cells contained within them. |
| $C \in \mathbb{R}^{k \times d}$                | Second reference compression term.                                                                                                                         |
| $Ref = \{\mu, \sigma, U, Y_{cos}, N_r, C\}$    | Symphony minimal reference elements comprising $\mu, \sigma, U, Y_{cos}, N_r, C$ .                                                                         |

358 **Query-related symbols:**

|                                                |                                                                                                                                |
|------------------------------------------------|--------------------------------------------------------------------------------------------------------------------------------|
| $G_q \in \mathbb{R}^{g \times m}$              | Input query gene expression matrix, prior to scaling.                                                                          |
| $G_{qs} \in \mathbb{R}^{g \times m}$           | Query gene expression matrix, scaled by <i>reference</i> gene means $\mu$ and standard deviations $\sigma$ .                   |
| $X_q \in \{0, 1\}^{c \times m}$                | Design matrix assigning query cells (columns) to query batches (rows).                                                         |
| $Z_q \in \mathbb{R}^{d \times m}$              | Query cell locations in original (non-harmonized) PC embedding.                                                                |
| $\hat{Z}_q \in \mathbb{R}^{d \times m}$        | Approximate query cell locations in integrated embedding (hPC space). Output of Symphony reference mapping.                    |
| $R_q \in [0, 1]^{k \times m}$                  | Soft cluster assignment of query cells (columns) to clusters (rows). Each column is a probability distribution that sums to 1. |
| $B_q \in \mathbb{R}^{k \times (1+c) \times d}$ | 3D tensor of the estimated parameters (betas and intercepts) of the linear mixture model for each of $k$ clusters.             |

359 **1.2 Symphony model and conditions for equivalence to Harmony integration**

360 Symphony and Harmony both use a linear mixture model framework, but the two methods perform  
361 different tasks: Harmony integrates a reference, whereas Symphony compresses the reference and  
362 enables efficient query mapping. To motivate the Symphony model, it is helpful to first briefly review the  
363 mixture model, which serves as the basis. Harmony integrates scRNA-seq datasets across batches  
364 (e.g. multiple donors, technologies, studies) and projects the cells into a harmonized embedding where  
365 cells cluster by cell type rather than batch-specific effects. Harmony takes as input a low-dimensional  
366 embedding of cells ( $Z$ ) and design matrix with assignments to batches ( $X$ ) and outputs a harmonized  
367 embedding ( $\hat{Z}$ ) with batch effects removed. Briefly, Harmony works by iterating between two  
368 subroutines—maximum diversity clustering and linear mixture model correction—until convergence. In  
369 the clustering step, cells are probabilistically assigned to soft clusters with a variant of soft  $k$ -means with  
370 a diversity penalty favoring clusters represented by multiple datasets rather than single datasets. In the  
371 correction step, each cluster learns a cluster-specific linear model that explains cell locations in PC  
372 space as a function of a cluster-specific intercept and batch membership. Then, cells are corrected by  
373 cell-specific linear factors weighted by cluster membership to remove batch-dependent effects. The full  
374 algorithm and implementation are detailed in Korsunsky et al. (2019)<sup>47</sup>.

375 In the scenario of mapping  $m$  query cells against  $n$  reference cells, the *de novo* integration strategy  
376 would model all cells as in (1), where the  $H$  subscript denotes the Harmony solution, in contrast to the  
377 Symphony model which is presented in (2). Let  $X_H \in \{0,1\}^{(c+b) \times (m+n)}$  represent the one-hot encoded  
378 design matrix assigning all cells across batches.  $X_H^*$  denotes  $X_H$  augmented with a row of 1s for the  
379 batch-independent intercept term:  $X_H^* = 1 || X_H$ . The intercept terms represent cluster centroids (location  
380 of “experts” in the mixture of experts model).  $Z_H$  represents the low-dimensional PCA embedding of all  
381 cells.  $R_H$  represents the probabilistic assignment of cells across  $k$  clusters, and  $diag(R_{Hk}) \in \mathbb{R}^{N \times N}$   
382 denotes the diagonalized  $k$ th row of  $R_H$ . For each cluster  $k$ , the parameters of the linear mixture model  
383  $B_k \in \mathbb{R}^{(1+c+b) \times d}$  can therefore be solved for as in (1), using ridge regression with ridge penalty  
384 hyperparameter  $\lambda$ . Note that we do not penalize the batch-independent intercept term:  $\lambda_0 = 0$ ,  
385  $\forall_{a \in [1:(c+b)]} \lambda_a = 1$ .

386 ***De novo* Harmony model:**

$$B_k = (X_H^* \text{diag}(R_{Hk}) X_H^{*T} + \lambda I)^{-1} X_H^* \text{diag}(R_{Hk}) Z_H^T \quad (1)$$

387 The goal of Symphony mapping is to add new query cells to the model in order to estimate and remove  
388 the query batch effects. Symphony mapping approximates *de novo* Harmony integration on all cells,  
389 except the reference cell positions in the harmonized embedding do not change. In order for Symphony  
390 mapping to be equivalent to *de novo* Harmony, several conditions must be met:

- 391 I. All cell states represented in the query dataset are captured by the reference datasets—i.e.  
392 there are no completely novel cell types in the query.
- 393 II. The number of reference cells is much larger than the query ( $m \ll n$ ).
- 394 III. The query dataset is obtained independent of the reference datasets—i.e. the reference  
395 batch design matrix ( $X_r$ ) has no interaction with the query batch design matrix ( $X_q$ ).

396 We consider these to be fair assumptions for large-scale reference atlases, allowing Symphony to  
397 make three key approximations:

- 398 (1) With a large reference, the reference-only PCs approximate the PCs for the combined reference  
399 and query datasets. This allows us to project the query cells into the pre-harmonized reference  
400 PCA space using the reference gene loadings ( $U$ ).
- 401 (2) The cluster centroids ( $Y$ ) for the integrated reference cells approximate the cluster centroids  
402 from harmonizing all cells.
- 403 (3) The reference cell cluster assignments ( $R_r$ ) remains approximately stable with the addition of  
404 query cells.

405 Given these approximations, we can thereby harmonize the reference cells *a priori* and save the  
406 reference-dependent portions of the Harmony mixture model (**Supplementary Equations**). In  
407 Symphony, we model the reference cells as already harmonized with batch effects removed, so we can  
408 thereafter ignore the reference design matrix structure. The Symphony design matrix  $X \in [0, 1]^{c \times N}$   
409 assigns all cells (reference and query) to *query* batches only.  $X^*$  denotes  $X$  augmented with a row of 1s

410  $(X_{[0, \cdot]}^*)$  corresponding to the batch-independent intercepts (we model the intercepts for all cells). The  
411 remaining  $c$  rows  $(X_{[1:c, \cdot]}^*)$  represent the one-hot batch assignment of the cells among the  $c$  query  
412 batches. Note that for the reference cell columns, these values are all 0 since the reference cells do not  
413 belong to any *query* batches. The parameters  $(B_{qk} \in \mathbb{R}^{(1+c) \times d})$  of the model for each cluster  $k$  can  
414 then be solved for as in (2). Similar to Harmony, we use ridge regression penalizing the non-intercept  
415 terms, where  $\lambda_0 = 0, \forall_{a \in [1:c]} \lambda_a = 1$ .

416 **Symphony model:**

$$B_{qk} \approx (X^* \text{diag}(R_k) X^{*T} + \lambda I)^{-1} X^* \text{diag}(R_k) Z^T \quad (2)$$

417 The matrix  $R \in \mathbb{R}^{k \times N}$  denotes the assignment of query and reference cells (columns) across the  
418 reference clusters (rows).  $Z \in \mathbb{R}^{d \times N}$  denotes the horizontal matrix concatenation of the uncorrected  
419 query cells in original PC space ( $Z_q$ ) and corrected reference cells in harmonized space ( $\hat{Z}_r$ ). For each  
420 cluster  $k$ , let matrix  $B_{qk} \in \mathbb{R}^{(1+c) \times d}$  represent the query parameters to be estimated. The first row of  
421  $B_{qk}$  represents the batch-independent intercept terms, and the remaining  $c$  rows of  $B_{qk}$  represent the  
422 query batch-dependent coefficients, which can be regressed out to harmonize the query cells with the  
423 reference. Note that the intercept terms from Symphony mapping should equal the cluster centroid  
424 locations from the integrated reference since the harmonized reference cells are modeled only by a  
425 weighted average of the centroid locations for the clusters over which it belongs (and a cell-specific  
426 residual). Hence, the reference cell positions should not change when removing query batch effects.  
427 The matrices  $X^*, R_k$ , and  $Z$  in (2) can be partitioned into query and reference-dependent portions. In the  
428 **Supplementary Equations**, we show in detail how the reference-dependent portions can be further  
429 simplified into a  $k \times 1$  vector and  $k \times d$  matrix ( $N_r$  and  $C$ ), which we call “reference compression terms.”  
430 Intuitively, the vector  $N_r$  contains the size (in cells) of each reference cluster. The matrix  $C = R_r \hat{Z}_r^T$  does  
431 not have as intuitive an explanation but follows from the derivation (**Supplementary Equations**). These  
432 terms can be computed at the time of reference building and saved as part of the minimal reference  
433 elements to reduce the necessary computations during mapping.



### 434 1.3 Reference building and compression

435 Reference compression is the key idea that allows for the efficient mapping of new query cells onto the  
436 harmonized reference embedding without the need to reintegrate all cells. To construct a Symphony  
437 reference with minimal elements needed for mapping, reference cells are first harmonized in a low-  
438 dimensional space (e.g. PCs) to remove batch-dependent effects. Symphony then compresses the  
439 Harmony mixture model components to be saved for subsequent query mapping.

#### 440 **Data structures**

441 Symphony takes as input a gene expression matrix for reference cells ( $G_r$ ) and corresponding one-hot-  
442 encoded design matrix ( $X_r$ ) containing metadata about assignment of cells to batches. It outputs a set  
443 of data structures, referred to as the Symphony minimal reference elements, that captures key  
444 information about the reference embedding that can be subsequently used to efficiently map previously  
445 unseen query cells (**Algorithm 1**). These components include the gene mean ( $\mu$ ) and standard  
446 deviation ( $\sigma$ ) used to scale the genes, the PCA gene loadings ( $U$ ), the final L2-normalized cluster  
447 centroid locations ( $Y_{cos}$ ), and precomputed values which we call the “reference compression terms” ( $N_r$   
448 and  $C$ ) that expedite the correction step of query mapping (**Supplementary Equations**). These  
449 elements are a subset of the components available once Harmony integration is applied to the  
450 reference cells. Note that other input embeddings, such as canonical correlation analysis (CCA), may  
451 be used in place of PCA as long as the gene loadings to perform query projection into those  
452 coordinates are saved.

453 **Table 1** lists the Symphony minimal reference elements required to perform mapping. **Table 2** shows  
454 additional components of a “full” Harmony reference that are not included in the Symphony reference  
455 elements. Importantly, the dimensions of the Symphony data structures do not require information on  
456 the  $n$  individual reference cells and hence do not scale with the raw number of reference cells. Rather  
457 the components scale with the biological complexity captured (i.e. number of clusters  $k$  and  
458 dimensionality of embedding  $d$ ). Conversely, the Harmony data structures store information on a per-  
459 cell basis ( $n$ ). Note that in practice the integrated embedding of reference cells ( $\hat{Z}_r$ ) listed in **Table 2** is

460 needed to perform downstream transfer of annotations from reference to query cells (e.g. k-NN), but it  
 461 is not required during any computations of the mapping step.

462 **Table 1: Symphony minimal reference elements**

|                                       |                                                                                                                                                            |
|---------------------------------------|------------------------------------------------------------------------------------------------------------------------------------------------------------|
| $\mu \in \mathbb{R}^{g \times 1}$     | Reference gene means used to center each gene for PCA.                                                                                                     |
| $\sigma \in \mathbb{R}^{g \times 1}$  | Reference gene standard deviations used to scale each gene for PCA.                                                                                        |
| $U \in \mathbb{R}^{g \times d}$       | Gene loadings to project from expression to PCA (or CCA) space                                                                                             |
| $Y_{cos} \in \mathbb{R}^{d \times k}$ | Cluster centroid locations in harmonized PC space, L2 normalized.                                                                                          |
| $N_r \in \mathbb{R}^{k \times 1}$     | First reference compression term. Vector containing the size of each of the $k$ clusters, effectively the number of reference cells contained within them. |
| $C \in \mathbb{R}^{k \times d}$       | Second reference compression term.                                                                                                                         |

463

464 **Table 2: Additional components of Harmony reference**

|                                                |                                                                                                                                                          |
|------------------------------------------------|----------------------------------------------------------------------------------------------------------------------------------------------------------|
| $G_r \in \mathbb{R}^{g \times n}$              | Input reference gene expression matrix, prior to scaling.                                                                                                |
| $X_r \in \{0, 1\}^{b \times n}$                | Design matrix assigning reference cells (columns) to reference batches (rows).                                                                           |
| $B_r \in \mathbb{R}^{k \times (1+b) \times d}$ | 3D tensor of the estimated parameters (betas and intercepts) of the linear mixture model for each of $k$ clusters for the reference cells.               |
| $\hat{Z}_r \in \mathbb{R}^{d \times n}$        | Integrated embedding for reference cells in harmonized PC (“hPC”) space, as output by Harmony.                                                           |
| $R_r \in [0, 1]^{k \times n}$                  | Soft cluster assignment of reference cells (columns) to clusters (rows), as output by Harmony. Each column is a probability distribution that sums to 1. |

465

## 466 **Algorithm**

467 Starting from reference cell gene expression, we first perform within-cell library size normalization (if not  
 468 already done) and variable gene selection to obtain  $G_r$ , scaling of the genes to have mean 0 and  
 469 variance 1 (saving  $\mu$  and  $\sigma$  for each gene), and PCA to embed the reference cells in a low-dimensional  
 470 space, saving the gene loadings ( $U$ ) (**Implementation Details**). Then, the PCA embedding ( $Z_r$ ) and  
 471 batch design matrix ( $X_r$ ) are used as input to Harmony integration to harmonize over batch-dependent  
 472 sources of variation. Given the resulting harmonized embedding ( $\hat{Z}_r$ ) and final soft assignment of

473 reference cells to clusters ( $R_r$ ), the locations of the final reference cluster centroids  $Y \in \mathbb{R}^{d \times k}$  can be  
474 calculated as in (3) and saved.

$$Y = \hat{Z}_r R_r^T \quad (3)$$

475 Symphony then computes the reference compression terms  $N_r$  (intuitively, the number of cells per  
476 cluster) and  $C$ , which does not have an intuitive explanation but can be directly computed as  $C = R_r \hat{Z}_r^T$ .  
477 Refer to the **Supplementary Equations** for a complete mathematical derivation of the compression  
478 terms. Symphony reference building ultimately returns the minimal reference elements:  $\mu, \sigma, U, Y_{cos}, N_r,$   
479 and  $C$  (**Fig. S1a**).

---

#### 480 **Algorithm 1** Build Symphony reference

---

```
481 function BUILDREFERENCE( $G_r, X_r$ )  
482      $\mu, \sigma, G_{rS} \leftarrow \mathbf{SCALE}(G_r)$   
483      $U, Z_r \leftarrow \mathbf{PCA}(G_{rS})$   
484      $\hat{Z}_r, R_r \leftarrow \mathbf{HARMONIZE}(Z_r, X_r)$   
485      $Y \leftarrow \hat{Z}_r R_r^T$   
486      $Y_{cos} \leftarrow \frac{Y_{[:,i]}}{\|Y_{[:,i]}\|_2}$   $\triangleright L_2$  normalize cluster centroids  
487      $N_r \leftarrow \mathbf{rowSums}(R_r)$   $\triangleright$  First compression term  
488      $C \leftarrow R_r \hat{Z}_r^T$   $\triangleright$  Second compression term  
489      $Ref \leftarrow (\mu, \sigma, U, Y_{cos}, N_r, C)$   
490     return  $Ref$   $\triangleright$  Return minimal reference elements
```

---

491

### 492 1.4 Symphony mapping

493 The Symphony mapping algorithm localizes new query cells to their appropriate locations in the  
494 harmonized embedding without the need to run integration on the reference and query cells altogether.  
495 The joint embedding of reference and query cells can be used for downstream analyses, such as  
496 transferring cell type annotations from the reference cells to the query cells.

497 **Data structures**

498 Symphony mapping takes as input the gene expression matrix for query cells ( $G_q$ ), query design matrix  
 499 assigning query cells to batches ( $X_q$ ), and the precomputed minimal elements for a reference ( $Ref$ ). It  
 500 outputs a query object containing the locations of query cells in the integrated reference embedding  
 501 ( $\hat{Z}_q$ ; **Algorithm 2**). **Table 3** lists the components of the query object that is returned by Symphony.

502 **Table 3: Components of Symphony query**

|                                                |                                                                                                                                |
|------------------------------------------------|--------------------------------------------------------------------------------------------------------------------------------|
| $G_q \in \mathbb{R}^{g \times m}$              | Input query gene expression matrix, prior to scaling.                                                                          |
| $X_q \in \{0, 1\}^{c \times m}$                | Design matrix assigning query cells (columns) to query batches (rows).                                                         |
| $Z_q \in \mathbb{R}^{d \times m}$              | Query cell locations in original (non-harmonized) PC embedding.                                                                |
| $\hat{Z}_q \in \mathbb{R}^{d \times m}$        | Approximate query cell locations in integrated embedding (hPC space).                                                          |
| $R_q \in [0, 1]^{k \times m}$                  | Soft cluster assignment of query cells (columns) to clusters (rows). Each column is a probability distribution that sums to 1. |
| $B_q \in \mathbb{R}^{k \times (1+c) \times d}$ | 3D tensor of the estimated parameters (betas and intercepts) of the linear mixture model for each of $k$ clusters.             |

503

504 **Algorithm**

505 The input to the query mapping procedure is a gene expression matrix ( $G_q$ ) and design matrix ( $X_q$ ) for  
 506 query cells, and the output is the locations of the cells in the harmonized embedding ( $\hat{Z}_q$ ). At a high  
 507 level, the mapping algorithm first projects the query cells into the original, non-harmonized PC space as  
 508 the reference cells using the reference gene loadings ( $U$ ) and assigns probabilistic cluster membership  
 509 across the reference cluster centroid locations. Then, the query cells are modeled using the Symphony  
 510 mixture model and corrected to their approximate locations in the integrated embedding by regressing  
 511 out the query batch-dependent effects (**Algorithm 2**).

512 **Projection of query cells into pre-harmonized PC Space**

513 Symphony projects the query cells into the same original PCs ( $Z_r$ ) as the reference. Symphony  
 514 assumes that, given a much smaller query compared to the reference ( $m \ll n$ ), the PCs will remain

515 approximately stable with the addition of query cells. To project the query cells, we first subset the  
516 query expression data by the same variable genes used in reference building and scale the normalized  
517 expression of each gene by the same mean and standard deviations used to scale the reference cells  
518  $(\mu, \sigma)$ . Let  $G_{qs}$  denote the query gene expression matrix scaled by the reference gene means and  
519 standard deviations. We can then use the reference gene loadings ( $U$ ) to project  $G_{qs}$  into reference PC  
520 space. In (4),  $Z_q \in \mathbb{R}^{d \times m}$  denotes the PC embedding for the query cells. Note that if an alternate  
521 starting embedding (e.g. CCA) is used instead of PCA, the gene loadings must be saved to enable this  
522 query projection step.

$$Z_q = U^T G_{qs} = \Sigma_q V_q^T \quad (4)$$

### 523 **Soft assignment across reference clusters**

524 Once the query cells are projected into PC space, we soft assign the cells to the reference clusters  
525 using the saved reference centroid locations ( $Y_{cos}$ ). Symphony assumes that the reference cluster  
526 centroid locations remain approximately stable with the addition of a much smaller query dataset since  
527 the query contains no novel cell types. Under these conditions, we use a previously published objective  
528 function for soft  $k$ -means clustering (5), which includes a distance term and an entropy regularization  
529 term over  $R$  weighted by hyperparameter  $\sigma$ . This is the same objective function as the clustering step of  
530 Harmony, except it does not include the diversity penalty term. In Harmony, the purpose of the diversity  
531 term is to penalize clusters that are only represented by one or a few datasets (suggesting they do not  
532 represent true cell types). In contrast, Symphony does not require the use of a diversity penalty  
533 because the reference centroids have already been established. Furthermore, the query cell types can  
534 comprise a subset of a larger set of reference cell types, and therefore not all clusters are necessarily  
535 expected to be represented in the query. We can solve for  $R_q$ , the optimal probabilistic assignment for  
536 query cells across each of the  $k$  reference clusters (**Implementation Details**).

$$\min_{R,Y} \sum_{i,k} R_{ki} \|Z_i - Y_k\|^2 + \sigma R_{ki} \log R_{ki} \quad (5)$$

$$\text{s.t. } \forall_i \forall_k R_{ki} > 0, \forall_i \sum_{k=1}^K R_{ki} = 1$$

537 **Mixture of experts correction**

538 The final step in Symphony mapping is to model then remove the query batch effects to obtain  $\hat{Z}_q$ , the  
 539 approximate location of query cells in the harmonized reference embedding. In equation (2), we  
 540 modeled the reference and query cells together and wish to solve for the query parameters  $B_{qk} \in$   
 541  $\mathbb{R}^{(1+c) \times d}$  for each cluster  $k$ . The reference-dependent terms in (2) were previously computed and  
 542 saved in compressed form ( $N_r$  and  $C$ ). With  $R_q$  and  $Z_q$  calculated from query cell projection and  
 543 clustering, we can finally solve for  $B_{qk}$ . Similar to the correction step of Harmony, we obtain cell-specific  
 544 correction values for the query cells by removing the batch-dependent terms captured in  $B_{qk[1:c, \cdot]}$ . Note  
 545 that the reference batch terms are neither modeled nor corrected during reference mapping, so the  
 546 harmonized reference cells do not move.

547 The final locations of the query cells in the harmonized embedding are estimated by iterating over all  $k$   
 548 clusters and subtracting out the non-intercept batch terms for each cell weighted by cluster membership  
 549 (6). Intuitively, the query centroids are moved so that they overlap perfectly with the reference centroids  
 550 in the harmonized embedding.  $\hat{Z}_{q[i]}$  denotes the approximate location in harmonized PC space for  
 551 query cell  $i$ .

$$Z_{q[i]} = \sum_k R_{q[k,i]} [B_{qk[0,\cdot]}^T + B_{qk[1:c,i]}^T X_q] + \varepsilon$$

$$\hat{Z}_{q[i]} = Z_{q[i]} - \sum_k R_{q[k,i]} B_{qk[1:c,\cdot]}^T X_q \tag{6}$$

$$\hat{Z}_{q[i]} = \sum_k R_{q[k,i]} B_{qk[0,\cdot]}^T + \varepsilon$$

---

552 **Algorithm 2** Map query cells onto reference

---

553 **function** QUERYMAPPING( $G_q, X_q, Ref$ )

554  $G_{qs} \leftarrow \mathbf{SCALE}(G_q, Ref\$ \mu, Ref\$ \sigma) \quad \triangleright \$ \text{ denotes accessing a component of } Ref$

```
555  $Z_q \leftarrow \text{PCAPROJECTION}(G_{qs}, \text{Ref}\$U)$ 
556  $R_q \leftarrow \text{CLUSTER}(Z_q, \text{Ref}\$Y_{cos})$ 
557  $\hat{Z}_q \leftarrow Z_q$ 
558 for  $k \leftarrow 1 \dots k$  do
559  $E \leftarrow X_q^* R_q^{(k)} X_q^{*T}$   $\triangleright X_q^*$ : query design matrix augmented with row of 1s
560  $E_{[0,0]} \leftarrow E_{[0,0]} + \text{Ref}\$N_{r(k)}$ 
561  $F \leftarrow X_q^* R_q^{(k)} Z_q^T$ 
562  $F_{[0, \cdot]} \leftarrow F_{[0, \cdot]} + \text{Ref}\$C_{[k, \cdot]}$ 
563  $B_{qk} \leftarrow (E + \lambda I)^{-1}(F)$ 
564  $B_{qk[0, \cdot]} \leftarrow 0$   $\triangleright$  Do not correct the intercept terms
565  $\hat{Z}_q \leftarrow \hat{Z}_q - B_{qk}^T X_q^* R_q^{(k)}$ 
566 return  $\hat{Z}_q$   $\triangleright$  Return query locations
```

---

567

## 568 1.5 Implementation details

### 569 Reference building and compression

#### 570 *Variable gene selection and scaling*

571 Starting with the gene expression matrix for reference cells, we perform log(CP10K) library size  
572 normalization of the cells (if not already done), subset by the top  $g$  variable genes by the vst method  
573 (as provided in Seurat<sup>49</sup>), which fits a line to the log(variance) and log(mean) relationship using local  
574 polynomial regression, then standardizes the features by observed mean and expected variance,  
575 calculating gene variance on the standardized values, which is re-implemented as a standalone  
576 function at <https://github.com/immunogenomics/singlecellmethods>. The data is scaled such that the  
577 expression of each gene has a mean expression of 0 and variance of 1 across all cells.

#### 578 **PCA**

579 We perform dimensionality reduction on the scaled gene expression  $G_{r,s}$  using principal component  
580 analysis (PCA). PCA projects the data a low-dimensional, orthonormal embedding that retains most of

581 the variation of gene expression in the dataset. Singular value decomposition (SVD) is a matrix  
582 factorization method that can calculate the PCs for a dataset. Here, we use SVD (irlba package in R<sup>48</sup>)  
583 to perform PCA. SVD states that matrix  $G_{rs}$  with dimensions  $g \times n$  can be factorized as:

$$G_{rs} = U\Sigma V^T \quad (7)$$

584 In (7),  $\Sigma V^T = Z_r$  (dimensions  $d \times n$ ) represents the embedding of reference cells in PC space, after  
585 truncating the matrix on the first  $d$  (by default,  $d = 20$ ) PCs. The gene loadings ( $U \in \mathbb{R}^{g \times d}$ ) are saved.  
586 Note that an alternative embedding, such as canonical correlation analysis (CCA) may be used in place  
587 of PCA, as long as the gene loadings are saved.

### 588 ***Harmony integration***

589 The PCA embedding ( $Z_r$ ) is then input to Harmony for dataset integration. By default, Symphony uses  
590 the default parameters for the cluster diversity enforcement ( $\theta = 2$ ), the entropy regularization  
591 hyperparameter for soft  $k$ -means ( $\sigma = 0.1$ ), and the number of clusters  $k = \min\left(100, \frac{n}{30}\right)$ . We save the  
592 L2-normalized cluster centroid locations  $Y_{cos}$  to the reference object since query mapping employs a  
593 cosine distance metric. If the reference has a single-level batch structure, no integration is performed,  
594 and the clusters are defined using soft  $k$ -means.

### 595 **Query mapping**

#### 596 ***Normalization and scaling***

597 The gene expression for query cells are assumed to be library size normalized in the same manner that  
598 was used to normalize the reference cells (e.g. log(CP10K)). During scaling, the query data is subset  
599 by the same variable genes from the reference datasets, and query gene expression is scaled by the  
600 *reference* gene means and standard deviations. Any genes present in the query but not the reference  
601 are ignored, and any genes present in the reference but not the query have scaled expression set to 0.

#### 602 ***Clustering step uses cosine distance***



603 As in Harmony, in practice we use cosine distance rather than Euclidean distance in the clustering step.  
 604 For the computation of the distance term, we L2-normalize the columns (cells) of  $Z$  and columns  
 605 (centroids) of  $Y_k$  such that the squared values sum to 1 across each column. Let the terms  $Z_{q\_cos[:,i]}$  and  
 606  $Y_{cos[:,k]}$  represent the L2-normalized locations of query cell  $i$  and the reference centroid for cluster  $k$  in  
 607 PC space, respectively. We compute the cosine distance between the cells and centroids. Since all  
 608  $Z_{q\_cos[:,i]}$  and  $Y_{cos[:,k]}$  each have unity norm, the squared Euclidean distance  $\|Z_{q\_cos[:,i]} - Y_{cos[:,k]}\|^2$  is  
 609 equivalent to the cosine distance  $2(1 - \cos(Y_{cos[:,k]}, Z_{q\_cos[:,i]})) = 2(1 - Y_{cos[:,k]}^T Z_{q\_cos[:,i]})$ . Therefore, the  
 610 objective function for query assignment to centroids becomes:

$$\min_{R,Y} \sum_{i,k} 2R_{q[k,i]}(1 - Y_{cos[:,k]}^T Z_{q\_cos[:,i]}) + \sigma R_{q[k,i]} \log R_{q[k,i]} \quad (8)$$

$$\text{s.t. } \forall_i \forall_k R_{q[k,i]} > 0, \forall_i \sum_{k=1}^K R_{q[k,i]} = 1$$

611 We can solve the optimization problem using an expectation-maximization framework. Following the  
 612 same strategy as Korsunsky et al. (2019), we calculate  $R_i$ , the optimal probabilistic assignment for each  
 613 query cell  $i$  across each of the  $k$  reference clusters. In (9), we can interpret  $R_{q[k,i]}$  as the probability that  
 614 query cell  $i$  belongs to cluster  $k$ . The denominator term simply ensures that for any given cell  $i$ , the  
 615 probabilities across all  $k$  clusters sum to one.

$$R_{q(k,i)} = \frac{\exp\left(-\frac{2}{\sigma}(1 - Y_{cos[:,k]}^T Z_{q\_cos[:,i]})\right)}{\sum_{k=1}^K \exp\left(-\frac{2}{\sigma}(1 - Y_{cos[:,k]}^T Z_{q\_cos[:,i]})\right)} \quad (9)$$

## 616 2. Analysis details

### 617 2.1 10x PBMCs and pancreas examples

#### 618 *Preprocessing scRNA-seq data*

619 As the three 10x PBMCs and reference pancreas datasets were previously preprocessed by our group  
620 as part of the Harmony publication, we used the same log(CP10K) normalized expression data, filtered  
621 as described in Korsunsky et al. (2019)<sup>50</sup>. The PBMCs consist of cells from three technologies: 3'v1  
622 (n=4,808 cells), 3'v2 (8,372 cells), and 5' (7,612 cells). The pancreas reference datasets were each  
623 sequenced with a different technology: Fluidigm C1 (n=638 cells), CEL-seq (946 cells), CEL-seq2  
624 (2,238 cells), Smart-seq2 (2,355 cells). The pancreas query dataset (inDrop, n=8,569 human and 1,886  
625 mouse cells) along with author-defined cell type labels were downloaded from [https://hemberg-](https://hemberg-lab.github.io/scRNA.seq.datasets/human/pancreas/)  
626 [lab.github.io/scRNA.seq.datasets/human/pancreas/](https://hemberg-lab.github.io/scRNA.seq.datasets/human/pancreas/).

### 627 ***Constructing the pancreas query with mouse and human***

628 For the pancreas query (Baron et al., 2016), we downloaded both the human and mouse expression  
629 matrices. In order to combine the two matrices into a single aggregated query, we “humanized” the  
630 mouse expression matrix by mapping mouse genes to their orthologous human genes. This mapping  
631 was computed using the biomaRt R package<sup>47</sup>, mapping `mg_i_symbol` from the  
632 `mmusculus_gene_ensembl` database to `hgnc_symbol` from the `hsapien_gene_ensembl`  
633 database. We represented this map as a matrix, with mouse genes as rows, human genes as columns,  
634 and values in  $\{0, 1\}$  assigned to denote whether a mouse gene maps to a human gene. We then  
635 normalized the matrix to have each column sum to one, effectively creating a count-preserving  
636 probabilistic map from  $d$  mouse to  $D$  human genes  $M \in \mathbb{R}^{d \times D}$ . Mapping from mouse to human genes is  
637 then performed with matrix multiplication:  $U_{\text{human}} = MU_{\text{mouse}}$ . Note that while the mouse gene expression  
638 matrix  $U_{\text{mouse}}$  contains only integers ( $U_{\text{mouse}} \in \mathbb{Z}^{d \times N}$ ), the many-to-many mapping means that the mapped  
639 human gene expression matrix  $U_{\text{human}}$  may contain non-integers ( $U_{\text{human}} \in \mathbb{R}^{D \times N}$ ). For any human  
640 orthologs that were missing in the mouse expression data, we filled in the expression with zeroes. The  
641 mouse mapping was based on 2,140 overlapping genes (of the 3,000 variable genes used for  
642 reference building) for which the mouse genes had human orthologs in the reference.

### 643 ***Symphony mapping experiments***

644 To construct each reference for query mapping, we aggregated all reference datasets into a single  
645 normalized expression matrix and identified the top  $g$  variable genes across all cells ( $g=2000$  for  
646 PBMCs,  $g=3000$  for pancreas) using the variance stabilizing transformation (vst) procedure<sup>49</sup>. We  
647 scaled the genes (mean = 0, variance = 1), performed PCA<sup>18</sup>, and ran Harmony on the top 20 PCs and  
648 default 100 clusters. For PBMCs, we harmonized over ‘technology’ with default parameters. For  
649 pancreas, we harmonized over ‘donor’ ( $\theta = 2$ ) and ‘technology’ ( $\theta = 4$ ), with  $\tau = 5$ . During Symphony  
650 mapping, we specified query ‘technology’ covariate for PBMCs and query ‘donor’, ‘species’, and  
651 ‘technology’ covariates for pancreas.

### 652 **Constructing gold standard embedding**

653 To construct the gold standard *de novo* Harmony embedding, we concatenated the reference and  
654 query datasets together into a single expression matrix, subsetted by the top  $g$  variable genes over all  
655 (both reference and query) cells ( $g=2000$  for PBMCs,  $g=3000$  for pancreas) and ran Harmony  
656 integration on the top 20 PCs<sup>49</sup>. For PBMCs, we harmonized over ‘technology’ with default parameters.  
657 For pancreas, we harmonized over ‘donor’ ( $\theta = 2$ ) and ‘technology’ ( $\theta = 4$ ), with  $\tau = 5$ .

### 658 **Assigning ground truth cell types**

659 We clustered the cells in the gold standard embedding using the Louvain algorithm as implemented in  
660 the Seurat functions *BuildSNN* and *RunModularityClustering*<sup>51</sup>. For PBMCs, we used  $nn\_k = 5$  (to  
661 capture rare HSCs),  $nn\_eps = 0.5$ , and  $resolution = 0.8$ . For pancreas, we used the same parameters  
662 except  $nn\_k = 30$ . We labeled clusters with ground truth cell types according to expression of canonical  
663 lineage marker genes (**Table S2,5**). PBMCs were assigned across 7 types: T (*CD3D*), NK (*GNL1*), B  
664 (*MS4A1*), Monocytes (*CD14*, *FCGR3A*), DCs (*FCER1A*), Megakaryocytes (*PPBP*), and HSCs (*CD34*).  
665 Pancreas cells were assigned across 9 types: alpha (*GCG*), beta (*MAFA*), gamma (*PPY*), delta (*SST*),  
666 acinar (*PRSS1*), ductal (*KRT19*), endothelial (*CDH5*), stellate (*COL1A2*), and immune (*PTPRC*).  
667 Clusters were labeled if the AUC (calculated using presto<sup>28</sup>) for the corresponding lineage marker was  
668  $>0.62$ . For clusters that did not express a specific lineage marker, we manually assigned a cell type  
669 based on the top differentially expressed genes (**Table S2,5**). In the PBMCs, cluster 20 was identified

670 as low-quality cells (high in mitochondrial genes; **Table S2**). We removed all cells in this cluster (n=94)  
671 from further analyses. The final ground truth labels were used in downstream analyses and cell type  
672 classification accuracy evaluation.

### 673 ***Evaluation of cell type classification accuracy***

674 We predicted query cell types by transferring reference cell type annotations using the *knn* function in  
675 the 'class' R package (k=5). Note for the pancreas human cell type classification, we excluded query  
676 epsilon and Schwann cells from the accuracy metrics because those cell types are not present in the  
677 reference. We calculated overall accuracy across all query cells and cell type F1 scores (the harmonic  
678 mean of precision and recall, ranging from 0 to 1). Precision = TP/(TP+FP), recall = TP/(TP+FN), F1 =  
679 (2 \* precision \* recall) / (precision + recall). Cell type F1 was the metric Abdelaal et al. recently used to  
680 benchmark automated cell type classifiers.<sup>40</sup> We used their *evaluate.R* script to calculate confusion  
681 matrices and F1 by cell type.

### 682 ***Quantifying local similarity between two embeddings***

683 k-NN-correlation (k-NN-corr) is a new metric that quantifies how well a given alternative embedding  
684 preserves the local neighborhood structure with respect to a gold standard embedding. Anchoring on  
685 each query cell, we calculate (1) the pairwise similarities to its *k* nearest reference neighbors in the gold  
686 standard embedding and (2) the similarities between the same query-reference neighbor pairs in an  
687 alternate embedding (**Methods**), then calculate the Spearman (rank-based) correlation between (1)  
688 and (2). For similarity, we use the radial basis function kernel:  $similarity(x,y) = \exp(-\|x-y\|^2/(2\sigma^2))$ . For  
689 each query cell, we obtain a single k-NN-corr value capturing how well the relative similarities to its *k*  
690 nearest reference neighbors are preserved. Note that k-NN-corr is asymmetric with respect to which  
691 embedding is selected as the gold standard and which is selected as the alternative because the  
692 nearest neighbor pairs are fixed based on how they were defined in the gold standard. The distribution  
693 of k-NN-corr scores for all query cells can measure the embedding quality, where higher k-NN-corr  
694 indicates greater recapitulation of the gold standard. Lower values for *k* assess more local  
695 neighborhoods, whereas higher *k* assesses more global structure.

696 We calculated k-NN-corr between the gold standard Harmony embedding and two alternative  
697 embeddings: (1) the full Symphony mapping algorithm (projection, clustering, and correction) and (2)  
698 PCA-projection only as a comparison to a batch-naïve mapping. PCA-projection refers to the first step  
699 of Symphony mapping, where query cells are projected from gene expression to pre-harmonized PC  
700 space:  $Z_q = U^T G_q$ .

## 701 2.2 Fetal liver hematopoiesis trajectory inference example

702 We obtained post-filtered, post-doublet removal data directly from the authors<sup>52</sup> along with author-  
703 defined cell type annotations for 113,063 cells sequenced with 10x 3' end bias and a separate 25,367  
704 cells sequenced with 10x 5' end bias. For building the harmonized reference from all 3' cells, we  
705 followed the same variable gene selection procedures as the original authors, using the Seurat  
706 variance/mean ratio (VMR) method with parameters  $\text{min\_expr} = .0125$ ,  $\text{max\_expr} = 3$ , and  
707  $\text{min\_dispersion} = 0.625$  (resulting in 1,917 variable genes). For each of 14 held-out donor experiments  
708 within the 3' dataset, we integrated the reference with Harmony on 13 donors ( $\theta = 3$ ). During Symphony  
709 mapping, we specified query 'donor' covariate. For mapping 5' cells against a 3' reference, we removed  
710 two donors (F2 and F5,  $n=3,953$ ) from the 5' query based on low library complexity (**Fig. S5b**), leaving  
711  $n=21,414$  cells from 5 donors. We integrated the reference (all 14 donors sequenced with 3' end bias)  
712 with Harmony over 'donor' ( $\theta = 3$ ). During Symphony mapping, we specified both 'donor' and  
713 'technology' as covariates. We predicted query cell types by transferring reference cell type annotations  
714 using the *knn* function in the 'class' R package ( $k=30$ ). We visualized the aggregated confusion matrix  
715 across all 14 held-out donor experiments as well as the confusion matrix for the single 5'-to-3'  
716 experiment using ComplexHeatmap R package<sup>40</sup>.

717 For the trajectory inference analysis, we obtained trajectory coordinates from the force directed graph  
718 (FDG) embedding of all 3'-sequenced cells from the original authors<sup>53</sup>, forming a reference trajectory.  
719 We restricted the trajectory to immune cell types only (excluding hepatocytes, fibroblasts, and  
720 endothelial). We then mapped a subset of the query cells belonging to the MEM lineage (MEMPs,  
721 megakaryocytes, mast cells, early-late erythroid;  $n=5,141$ ) to the reference-defined trajectory by

722 averaging the FDG coordinates of the 10 reference immune cell neighbors in the Symphony  
723 embedding. Note: in addition to the author-provided FDG trajectory, we explored building a trajectory  
724 on the reference immune cells with DDRTree<sup>43</sup>, but we found that the inferred trajectory was not as  
725 clean as FDG.

## 726 2.3 Memory T cell surface protein inference example

727 We used a memory T cell CITE-seq dataset collected from a tuberculosis disease progression cohort of  
728 259 individuals of admixed Peruvian ancestry<sup>54</sup>. The dataset includes expression of the whole  
729 transcriptome (33,538 genes) and 30 surface protein markers from 500,089 memory T cells isolated  
730 from PBMCs. Including technical replicates, 271 samples were processed across 46 batches.

731 To assess protein prediction accuracy using Symphony embeddings, we randomly selected 217  
732 samples (411,004 cells), normalized the expression of each gene ( $\log_2(\text{CP10K})$ ) and built a Symphony  
733 reference based on mRNA expression, correcting for donor and batch. The held-out 54 samples  
734 comprised the query that we mapped onto the reference. We predicted the expression of each of the 30  
735 surface proteins in each of the query cells by averaging the protein's expression across the cell's 50  
736 nearest reference neighbors. Nearest neighbors were defined based on Euclidean distance in the  
737 batch-corrected low-dimensional embedding. As a ground truth for each protein in each query cell, we  
738 computed a smoothed estimate of the cells' measured protein expression by averaging the protein's  
739 expression across the cell's 50 nearest neighbors in the batch-corrected complete PCA embedding of  
740 all 259 donors. We did not use the cells' raw measured protein expression due to dropout. We  
741 computed the Pearson correlation coefficient between our predicted expression and the ground truth  
742 expression across all cells per donor for each marker.

743 To assess protein prediction accuracy based on mapping to a joint mRNA and protein-based  
744 Symphony reference, we first built an integrated reference by using canonical correlation analysis  
745 (CCA) to project cells into a low-dimensional embedding maximizing correlation between mRNA and  
746 protein features. We randomly selected 217 samples (395,373 cells) to comprise this reference, and  
747 normalized the expression of each gene ( $\log_2(\text{CP10K})$ ), selected the top 2,865 most variable genes,

748 and scaled (mean = 0, variance = 1) all mRNA and protein features. We computed 20 canonical  
749 variates (CVs) with the `cc` function in the CCA R package<sup>55</sup> and corrected the mRNA CVs for donor and  
750 batch effects with Harmony. Then, we used Symphony to construct a reference based on the batch-  
751 corrected CVs, gene loadings on each CV, and mean and standard deviation used to scale each gene  
752 prior to CCA. The held-out 54 samples comprised the query that we mapped onto the reference. As  
753 described above, we predicted the expression of each of the 30 surface proteins in each of the query  
754 cells based on the cell's 5, 10, or 50 nearest neighbors in the reference, estimated the smoothed  
755 ground truth expression of each protein in each query cell (now based on the batch-corrected CCA  
756 embedding of all 259 donors) and computed the Pearson correlation coefficient for each marker.

## 757 2.4 Visualization

758 For visualizing the embeddings using UMAP<sup>28,33</sup>, we used the 'uwot' R package with the following  
759 parameters: `n_neighbors=30`, `learning_rate=0.5`, `init = 'laplacian'`, `metric = 'cosine'`, `min_dist=0.1`  
760 (except `min_dist=0.3` for fetal liver example). For each Symphony reference, we saved the uwot model  
761 at the time of UMAP using the `uwot::save_uwot` function and saved the path to the model file as part of  
762 the Symphony reference object. Saving the reference UMAP model allows for the fast projection of new  
763 query cells into reference UMAP space from the query embedding from Symphony mapping using the  
764 function `uwot::transform`.

765 To distinguish the reference plots from query plots, we visually present the reference embedding as a  
766 contour density instead of individual cells. The density plots were generated using ggplot2 function  
767 `stat_density_2d` with `geom = 'polygon'` and `contour_var = 'ndensity'`. We provide custom functions to  
768 generate these plots as part of the Symphony package.

## 769 2.5 Benchmarking against automatic cell type classifiers

770 We downloaded the Pbmcbench benchmarking dataset used by a recent comparison of automatic cell  
771 type identification methods<sup>28</sup>. For each of 48 train-test experiments previously described<sup>51</sup>, we used the  
772 same evaluation metrics (median cell type F1 score) to evaluate Symphony in comparison to the 22

773 other classifiers. We obtained the numerical F1-score results for all other classifiers for each of the 48  
774 experiments directly from the authors in order to determine Symphony's place within the rank ordering  
775 of classifier performance.

776 During reference building, we tried two different gene selection methods: (1) unsupervised (top 2000  
777 variable genes) and (2) supervised based on identifying the top 20 differentially expressed (DE) genes  
778 per cell type. Option (2) was included to give Symphony the same information as prior-knowledge  
779 classifiers (e.g. SCINA with 20 marker genes per cell type). We used the 'presto' package<sup>56</sup> for DE  
780 analysis. No integration was performed because the reference had a single-level batch structure  
781 (clusters were simply assigned using soft k-means). Onto each of 7 references (each representing 1  
782 protocol for donor pbmc1), we mapped either a second protocol for donor pbmc1 (6 experiments) or the  
783 same protocol for donor pbmc2 (1 experiment). Given the resulting Symphony joint feature  
784 embeddings, we used three downstream classifiers to predict query cell types: 5-NN, SVM with a radial  
785 kernel, and glm\_net with ridge<sup>34</sup>. A total of 6 Symphony-based classifiers were tested (2 gene selection  
786 methods \* 3 downstream classifiers).

## 787 2.6 Runtime analysis

788 We downsampled a large memory T cell dataset<sup>34</sup> to create benchmark reference datasets with 20,000,  
789 50,000, 100,000, 250,000, and 500,000 cells. For each, we built a reference (20 PCs, 100 centroids)  
790 integrating over 'donor' and mapped three different-sized queries: 1,000, 10,000, and 100,000 cells. To  
791 isolate the separate effects of number of query cells and number of query batches on mapping time, we  
792 mapped against the 50,000-cell reference: (1) varying the number of query cells (from 1,000 to 10,000  
793 cells) while keeping the number of donors constant and (2) varying the number of query donors (6 to  
794 120 donors) while keeping the number of cells constant (randomly sampling 10,000 cells). We also  
795 performed separate experiments varying the number of reference centroids (25 to 400) and number of  
796 dimensions (10 to 320 PCs) while keeping all other parameters constant. We ran all jobs on Linux  
797 servers allotted 4 cores and 64 GB of memory (Intel Xeon E5-2690 v.3 processors) and used the  
798 *proc.time* R function to measure elapsed time.



## 799 Data availability

800 Datasets for all analyses were obtained from the links in **Table S1**. All datasets are publicly available  
801 except the memory T cell CITE-seq data, which will be available at GEO accession GSE158769.

## 802 Code availability

803 We provide an implementation of Symphony along with prebuilt references from all examples at  
804 <https://github.com/immunogenomics/symphony>. Scripts reproducing results of this paper will be made  
805 available at <https://github.com/immunogenomics/referencemapping>.

## 806 Acknowledgements

807 We thank members of the Raychaudhuri Lab for helpful feedback and comments. We thank members  
808 of the Tuberculosis Research Unit (TBRU) LIMAA and Socios En Salud, in particular Megan Murray,  
809 Jessica Beynor, Yuriy Baglaenko, Sara Suliman, Ildiko van Rhijn, and Leonid Lecca, for their  
810 contributions to generating the memory T cell dataset. We would also like to thank Issac Goh, Muzlifah  
811 Haniffa, and other members of the Haniffa Lab for graciously providing preprocessed datasets from  
812 their fetal liver hematopoiesis study. This work is supported in part by funding from the National  
813 Institutes of Health (UH2AR067677, 1U01HG009088, U01 HG009379, and 1R01AR063759). The  
814 project described was supported by award Number T32GM007753 from the National Institute of  
815 General Medical Sciences (JBK). The content is solely the responsibility of the authors and does not  
816 necessarily represent the official views of the National Institute of General Medical Sciences or the  
817 National Institutes of Health.

## 818 Author contributions

819 I.K., J.B.K., and S.R. conceived the project. J.B.K. and I.K. developed the method and performed the  
820 analyses under the guidance of S.R. S.R., A.N., and D.B.M. contributed to generating the memory T

821 cell dataset. A.N. performed analysis of the memory T cell dataset. All authors participated in  
822 interpretation and writing the manuscript.

## 823 Competing interests

824 SR receives research support from Biogen.

## 825 References

- 826 1. Klein, A. M. & Treutlein, B. Single cell analyses of development in the modern era. *Development*  
827 **146**, (2019).
- 828 2. Svensson, V., da Veiga Beltrame, E. & Pachter, L. A curated database reveals trends in single-cell  
829 transcriptomics. *biorxiv* (2019) doi:10.1101/742304.
- 830 3. Han, X. *et al.* Construction of a human cell landscape at single-cell level. *Nature* (2020)  
831 doi:10.1038/s41586-020-2157-4.
- 832 4. Cao, J. *et al.* The single-cell transcriptional landscape of mammalian organogenesis. *Nature* **566**,  
833 496–502 (2019).
- 834 5. Jerber, J. *et al.* Population-scale single-cell RNA-seq profiling across dopaminergic neuron  
835 differentiation. *bioRxiv* 2020.05.21.103820 (2020) doi:10.1101/2020.05.21.103820.
- 836 6. Zhang, F. *et al.* Defining inflammatory cell states in rheumatoid arthritis joint synovial tissues by  
837 integrating single-cell transcriptomics and mass cytometry. *Nat. Immunol.* **20**, 928–942 (2019).
- 838 7. Reyes, M. *et al.* An immune-cell signature of bacterial sepsis. *Nat. Med.* **26**, 333–340 (2020).
- 839 8. Kotliarov, Y. *et al.* Broad immune activation underlies shared set point signatures for vaccine  
840 responsiveness in healthy individuals and disease activity in patients with lupus. *Nat. Med.* **26**,  
841 618–629 (2020).
- 842 9. Schafflick, D. *et al.* Integrated single cell analysis of blood and cerebrospinal fluid leukocytes in  
843 multiple sclerosis. *Nat. Commun.* **11**, 247 (2020).

- 844 10. Smillie, C. S. *et al.* Intra- and Inter-cellular Rewiring of the Human Colon during Ulcerative Colitis.  
845 *Cell* **178**, 714-730.e22 (2019).
- 846 11. Litviňuková, M. *et al.* Cells of the adult human heart. *Nature* (2020) doi:10.1038/s41586-020-2797-  
847 4.
- 848 12. Rozenblatt-Rosen, O., Stubbington, M. J. T., Regev, A. & Teichmann, S. A. The Human Cell Atlas:  
849 from vision to reality. *Nature* **550**, 451–453 (2017).
- 850 13. Haghverdi, L., Lun, A. T. L., Morgan, M. D. & Marioni, J. C. Batch effects in single-cell RNA-  
851 sequencing data are corrected by matching mutual nearest neighbors. *Nat. Biotechnol.* **36**, 421–  
852 427 (2018).
- 853 14. Hie, B., Bryson, B. & Berger, B. Efficient integration of heterogeneous single-cell transcriptomes  
854 using Scanorama. *Nat. Biotechnol.* **37**, 685–691 (2019).
- 855 15. Welch, J. D. *et al.* Single-Cell Multi-omic Integration Compares and Contrasts Features of Brain  
856 Cell Identity. *Cell* **177**, 1873-1887.e17 (2019).
- 857 16. Lopez, R., Regier, J., Cole, M. B., Jordan, M. I. & Yosef, N. Deep generative modeling for single-  
858 cell transcriptomics. *Nat. Methods* **15**, 1053–1058 (2018).
- 859 17. Korsunsky, I. *et al.* Fast, sensitive and accurate integration of single-cell data with Harmony. *Nat.*  
860 *Methods* **16**, 1289–1296 (2019).
- 861 18. Stuart, T. *et al.* Comprehensive Integration of Single-Cell Data. *Cell* **177**, 1888-1902.e21 (2019).
- 862 19. He, Z., Brazovskaja, A., Ebert, S., Camp, J. G. & Treutlein, B. CSS: cluster similarity spectrum  
863 integration of single-cell genomics data. *Genome Biol.* **21**, 224 (2020).
- 864 20. Tran, H. T. N. *et al.* A benchmark of batch-effect correction methods for single-cell RNA  
865 sequencing data. *Genome Biol.* **21**, 12 (2020).
- 866 21. Zhang, Q. *et al.* Landscape and Dynamics of Single Immune Cells in Hepatocellular Carcinoma.  
867 *Cell* **179**, 829-845.e20 (2019).
- 868 22. Wei, K. *et al.* Notch signalling drives synovial fibroblast identity and arthritis pathology. *Nature* **582**,  
869 259–264 (2020).

- 870 23. Kirita, Y., Wu, H., Uchimura, K., Wilson, P. C. & Humphreys, B. D. Cell profiling of mouse acute  
871 kidney injury reveals conserved cellular responses to injury. *Proc. Natl. Acad. Sci. U. S. A.* **117**,  
872 15874–15883 (2020).
- 873 24. Sandu, I. *et al.* Landscape of Exhausted Virus-Specific CD8 T Cells in Chronic LCMV Infection.  
874 *Cell Rep.* **32**, 108078 (2020).
- 875 25. Lähnemann, D. *et al.* Eleven grand challenges in single-cell data science. *Genome Biol.* **21**, 31  
876 (2020).
- 877 26. Lotfollahi, M. *et al.* Query to reference single-cell integration with transfer learning. *bioRxiv* (2020).
- 878 27. Cao, Z.-J., Wei, L., Lu, S., Yang, D.-C. & Gao, G. Searching large-scale scRNA-seq databases via  
879 unbiased cell embedding with Cell BLAST. *Nat. Commun.* **11**, 3458 (2020).
- 880 28. Abdelaal, T. *et al.* A comparison of automatic cell identification methods for single-cell RNA  
881 sequencing data. *Genome Biol.* **20**, 194 (2019).
- 882 29. Zhang, Z. *et al.* SCINA: A Semi-Supervised Subtyping Algorithm of Single Cells and Bulk Samples.  
883 *Genes* **10**, (2019).
- 884 30. Kiselev, V. Y., Yiu, A. & Hemberg, M. scmap: projection of single-cell RNA-seq data across data  
885 sets. *Nat. Methods* **15**, 359–362 (2018).
- 886 31. Alquicira-Hernandez, J., Sathe, A., Ji, H. P., Nguyen, Q. & Powell, J. E. scPred: accurate  
887 supervised method for cell-type classification from single-cell RNA-seq data. *Genome Biol.* **20**, 264  
888 (2019).
- 889 32. Tan, Y. & Cahan, P. SingleCellNet: A Computational Tool to Classify Single Cell RNA-Seq Data  
890 Across Platforms and Across Species. *Cell Syst* **9**, 207-213.e2 (2019).
- 891 33. Ding, J. *et al.* Systematic comparative analysis of single cell RNA-sequencing methods. *bioRxiv*  
892 632216 (2019) doi:10.1101/632216.
- 893 34. Nathan, A. *et al.* Multimodal Profiling of 500,000 Memory T Cells from a Tuberculosis Cohort  
894 Identifies Cell State Associations with Demographics, Environment, and Disease. (2020)  
895 doi:10.2139/ssrn.3652337.

- 896 35. Segerstolpe, Å. *et al.* Single-Cell Transcriptome Profiling of Human Pancreatic Islets in Health and  
897 Type 2 Diabetes. *Cell Metab.* **24**, 593–607 (2016).
- 898 36. Lawlor, N. *et al.* Single-cell transcriptomes identify human islet cell signatures and reveal cell-type-  
899 specific expression changes in type 2 diabetes. *Genome Res.* **27**, 208–222 (2017).
- 900 37. Grün, D. *et al.* De Novo Prediction of Stem Cell Identity using Single-Cell Transcriptome Data. *Cell*  
901 *Stem Cell* **19**, 266–277 (2016).
- 902 38. Muraro, M. J. *et al.* A Single-Cell Transcriptome Atlas of the Human Pancreas. *Cell Syst* **3**, 385-  
903 394.e3 (2016).
- 904 39. Baron, M. *et al.* A Single-Cell Transcriptomic Map of the Human and Mouse Pancreas Reveals  
905 Inter- and Intra-cell Population Structure. *Cell Syst* **3**, 346-360.e4 (2016).
- 906 40. Popescu, D.-M. *et al.* Decoding human fetal liver haematopoiesis. *Nature* **574**, 365–371 (2019).
- 907 41. Stoeckius, M. *et al.* Simultaneous epitope and transcriptome measurement in single cells. *Nat.*  
908 *Methods* **14**, 865–868 (2017).
- 909 42. Peterson, V. M. *et al.* Multiplexed quantification of proteins and transcripts in single cells. *Nat.*  
910 *Biotechnol.* **35**, 936–939 (2017).
- 911 43. Nathan, A. *et al.* Multimodal memory T cell profiling identifies a reduction in a polyfunctional Th17  
912 state associated with tuberculosis progression. *bioRxiv* 2020.04.23.057828 (2020)  
913 doi:10.1101/2020.04.23.057828.
- 914 44. Luecken, M. D. & Theis, F. J. Current best practices in single-cell RNA-seq analysis: a tutorial. *Mol.*  
915 *Syst. Biol.* **15**, e8746 (2019).
- 916 45. Lotfollahi, M., Naghipourfar, M., Theis, F. J. & Alexander Wolf, F. Conditional out-of-sample  
917 generation for unpaired data using trVAE. *arXiv [cs.LG]* (2019).
- 918 46. Berger, B. & Cho, H. Emerging technologies towards enhancing privacy in genomic data sharing.  
919 *Genome Biol.* **20**, 128 (2019).
- 920 47. Wang, S., Pisco, A. O., Karkanas, J. & Altman, R. B. Unifying single-cell annotations based on the  
921 Cell Ontology. *bioRxiv* 810234 (2019) doi:10.1101/810234.

- 922 48. Gayoso, A. *et al.* A Joint Model of RNA Expression and Surface Protein Abundance in Single Cells.  
923 *bioRxiv* 791947 (2019) doi:10.1101/791947.
- 924 49. Baglama, J. & Reichel, L. Augmented Implicitly Restarted Lanczos Bidiagonalization Methods.  
925 *SIAM Journal on Scientific Computing* vol. 27 19–42 (2005).
- 926 50. Durinck, S., Spellman, P. T., Birney, E. & Huber, W. Mapping identifiers for the integration of  
927 genomic datasets with the R/Bioconductor package biomaRt. *Nat. Protoc.* **4**, 1184–1191 (2009).
- 928 51. Korsunsky, I., Nathan, A., Millard, N. & Raychaudhuri, S. Presto scales Wilcoxon and auROC  
929 analyses to millions of observations. *bioRxiv* 653253 (2019) doi:10.1101/653253.
- 930 52. Gu, Z., Eils, R. & Schlesner, M. Complex heatmaps reveal patterns and correlations in  
931 multidimensional genomic data. *Bioinformatics* **32**, 2847–2849 (2016).
- 932 53. Qi Mao, Li Wang, Tsang, I. W. & Yijun Sun. Principal Graph and Structure Learning Based on  
933 Reversed Graph Embedding. *IEEE Trans. Pattern Anal. Mach. Intell.* **39**, 2227–2241 (2017).
- 934 54. Leurgans, S. E., Moyeed, R. A. & Silverman, B. W. Canonical Correlation Analysis When the Data  
935 are Curves. *J. R. Stat. Soc. Series B Stat. Methodol.* **55**, 725–740 (1993).
- 936 55. McInnes, L., Healy, J. & Melville, J. UMAP: Uniform Manifold Approximation and Projection for  
937 Dimension Reduction. *arXiv [stat.ML]* (2018).
- 938 56. Friedman, J., Hastie, T. & Tibshirani, R. Regularization Paths for Generalized Linear Models via  
939 Coordinate Descent. *J. Stat. Softw.* **33**, 1–22 (2010).
