# 1 **Efficient and precise single-cell reference atlas mapping with Symphony**

2 Joyce B. Kang<sup>1-5</sup>, Aparna Nathan<sup>1-5</sup>, Fan Zhang<sup>1-5</sup>, Nghia Millard<sup>1-5</sup>, Laurie Rumker<sup>1-5</sup>, D. Branch  
3 Moody<sup>3</sup>, Ilya Korsunsky<sup>1-5\*\*</sup>, Soumya Raychaudhuri<sup>1-6\*\*</sup>

4 <sup>1</sup> Center for Data Sciences, Brigham and Women's Hospital, Boston, MA, USA

5 <sup>2</sup> Division of Genetics, Department of Medicine, Brigham and Women's Hospital and Harvard Medical  
6 School, Boston, MA, USA

7 <sup>3</sup> Division of Rheumatology, Inflammation, and Immunity, Department of Medicine, Brigham and  
8 Women's Hospital and Harvard Medical School, Boston, MA, USA

9 <sup>4</sup> Department of Biomedical Informatics, Harvard Medical School, Boston, MA, USA

10 <sup>5</sup> Program in Medical and Population Genetics, Broad Institute of MIT and Harvard, Cambridge, MA,  
11 USA

12 <sup>6</sup> Versus Arthritis Centre for Genetics and Genomics, Centre for Musculoskeletal Research, Manchester  
13 Academic Health Science Centre, The University of Manchester, Manchester, UK

14

15 \*\* These authors jointly supervised this work.

16

17 Correspondence to:

18 Ilya Korsunsky

19 Harvard New Research Building

20 77 Avenue Louis Pasteur

21 Boston, MA 02115

22 [ikorsunskiy@bwh.harvard.edu](mailto:ikorsunskiy@bwh.harvard.edu)

23

24 Soumya Raychaudhuri

25 Harvard New Research Building

26 77 Avenue Louis Pasteur, Suite 250

27 Boston, MA 02115

28 [soumya@broadinstitute.org](mailto:soumya@broadinstitute.org)

29 Ph: 617-525-4484 Fax: 617-525-4488

## 30 Abstract

31 Recent advances in single-cell technologies and integration algorithms make it possible to construct  
32 comprehensive reference atlases encompassing many donors, studies, disease states, and sequencing  
33 platforms. Much like mapping sequencing reads to a reference genome, it is essential to be able to map  
34 query cells onto complex, multimillion-cell reference atlases to rapidly identify relevant cell states and  
35 phenotypes. We present Symphony (<https://github.com/immunogenomics/symphony>), an algorithm for  
36 building integrated reference atlases of millions of cells in a convenient, portable format that enables  
37 efficient query mapping within seconds. Symphony localizes query cells within a stable low-dimensional  
38 reference embedding, facilitating reproducible downstream transfer of reference-defined annotations to  
39 the query. We demonstrate the power of Symphony by (1) mapping a multi-donor, multi-species query  
40 to predict pancreatic cell types, (2) localizing query cells along a developmental trajectory of human  
41 fetal liver hematopoiesis, and (3) inferring surface protein expression with a multimodal CITE-seq atlas  
42 of memory T cells.

43

44 **Keywords:** single-cell genomics, scRNA-seq, reference mapping, annotation

## 45 Introduction

46 Advancements in single-cell RNA-sequencing (scRNA-seq) have launched an era in which individual  
47 studies can routinely profile  $10^4$ - $10^6$  cells<sup>1-3</sup>, and multimillion-cell datasets are already emerging<sup>4,5</sup>.  
48 Single-cell resolution enables the discovery and refinement of cell states across diverse clinical and  
49 biological contexts<sup>6-11</sup>. To date, most studies redefine cell states from scratch, making it difficult to  
50 compare results across studies and thus hampering reproducibility. Coordinated large-scale efforts,  
51 exemplified by the Human Cell Atlas (HCA)<sup>12</sup>, aim to establish comprehensive and well-annotated  
52 reference datasets comprising millions of cells that capture the broad spectrum of cell states. Building  
53 these reference atlases requires integrating multiple datasets that may have been collected under  
54 different technical and biological conditions. Hence, reference construction requires application of one  
55 of many recently developed single-cell integration algorithms<sup>13-19</sup>. Our group previously developed  
56 Harmony<sup>15</sup>, a fast, accurate, and well-reviewed method<sup>20</sup> that is able to explicitly model complex study  
57 design, a property that makes it suitable for integrating complex datasets into reference atlases<sup>21-24</sup>.  
58 The potential to define common cell states using reference maps has already been demonstrated<sup>25,26</sup>.  
59 For example, we built an integrated reference of ~80,000 single-cell profiles of fibroblasts from human  
60 lung, synovium, salivary gland, and intestine and successfully mapped fibroblasts from human skin and  
61 mouse synovium, lung, and intestine to analyze conserved states across tissues and species<sup>25</sup>. Once  
62 such reference atlases are painstakingly constructed, interpretation of new datasets requires the ability  
63 to quickly map single-cell profiles into these reference atlases. This enables interpretation of new  
64 datasets by transferring annotations and metadata of interest from nearby reference cells.

65 Fast mapping of query cells against a large, stable reference is a well-recognized open  
66 problem<sup>27</sup> and active area of research<sup>28-30</sup>. One inefficient but accurate approach to project reference  
67 and query cells into a joint embedding is to integrate both sets of cells together *de novo*, resulting in  
68 what might be considered a “gold standard” embedding. While this approach is reasonable for relatively  
69 small reference datasets, it is intractable for atlas-sized references with millions of cells. It requires  
70 users to “rebuild” the reference for each analysis, which may be computationally challenging and

71 require administratively cumbersome exchanges of large-scale datasets. Furthermore, *de novo*  
72 integration may corrupt the reference embedding once a reference is carefully constructed and  
73 annotated. It is instead preferable to freeze the reference when mapping new query cells onto it.

74 Here, we define reference mapping to mean placing query cells within the same embedding as  
75 integrated reference cells without requiring access to the raw data on all individual reference cells.  
76 Importantly, this embedding does not take advantage of any particular annotation, such as cell type  
77 labels, which may be refined or updated over time. This is in contrast to automated cell type classifiers,  
78 such as scmap<sup>31</sup>, which assign rigid annotations based on reference datasets in a supervised manner.  
79 Reference mapping approaches introduced so far include Seurat v4<sup>30</sup>, which is compatible with Seurat  
80 integration<sup>18</sup>, and scArches, which is compatible with autoencoders such as scANVI<sup>32</sup> and trVAE<sup>33</sup>.  
81 These approaches separate reference building, which integrates datasets in the reference into a low-  
82 dimensional embedding, from query mapping, which uses a compressed version of the reference to  
83 efficiently map cells into the reference embedding. They further contrast with *de novo* integration  
84 methods like BBKNN<sup>34</sup>, Seurat v3<sup>18</sup>, and Harmony<sup>17</sup>, which enable reference building but are slow and  
85 require access to the raw data and batch information on individual reference cells. High-quality  
86 reference mapping requires both a framework to efficiently store an integrated reference, and a fast and  
87 accurate procedure to map query datasets.

88 An ideal reference mapping algorithm must meet four key requirements. First, similar to *de novo*  
89 integration algorithms, they must be able to remove confounding signals due to complex study design  
90 in both the reference and query. In addition, they must be able to scale to large datasets, map with high  
91 accuracy, and enable inference of diverse query cell annotations based on reference cells. We present  
92 Symphony, a novel algorithm to compress a large, integrated reference and map query cells to a  
93 precise location in the reference embedding within seconds. Through multiple real-world dataset  
94 analyses, we show that Symphony can enable accurate downstream inference of cell type,  
95 developmental trajectory position, and protein expression, even when the query itself contains complex  
96 confounding technical and biological effects.

## 97 Results

### 98 **Symphony compresses an integrated reference for efficient query mapping**

99 Symphony comprises two main algorithms: reference compression and mapping (**Methods, Fig. S1a**).  
100 Symphony *reference compression* captures and structures information from multiple reference datasets  
101 into an integrated and concise format that can subsequently be used to map query cells (**Fig. 1a-b**).  
102 Symphony builds upon the linear mixture model framework first introduced by Harmony<sup>17</sup>. Briefly, in a  
103 low-dimensional embedding, such as principal component analysis (PCA), the model represents cell  
104 states as soft clusters, in which a cell's identity is defined by probabilistic assignments across one or  
105 more clusters. For *de novo* integration of the reference, cells are iteratively assigned soft cluster  
106 memberships, which are used as weights in a linear mixture model to remove unwanted covariate-  
107 dependent effects. To store the reference efficiently without saving information on individual reference  
108 cells, Symphony computes summary statistics learned in the low-dimensional space (**Fig. 1b,**  
109 **Methods**), returning computationally efficient data structures containing the “minimal reference  
110 elements” needed to map new cells. These include the means and standard deviations used to scale  
111 the genes, the gene loadings from PCA (or another low dimensional projection, e.g. canonical  
112 correlation analysis [CCA]) on the reference cells, soft-cluster centroids from the integrated reference,  
113 and two “compression terms” (a  $k \times 1$  vector and  $k \times d$  matrix, where  $k$  is the number of clusters and  $d$  is  
114 the dimensionality of the embedding) (**Methods, Supplementary Equations, Fig. S1b**).

115 To map new query cells to the compressed reference, we apply Symphony *mapping*. The  
116 algorithm approximates integration of reference and query cells *de novo* (**Methods**), but uses only the  
117 minimal reference elements to compute the mapping (**Fig. S1c**). First, Symphony projects query gene  
118 expression profiles into the same uncorrected low-dimensional space as the reference cells (e.g. PCs),  
119 using the saved scaling parameters and reference gene loadings (**Fig. 1c**). Second, Symphony  
120 computes soft cluster assignments for the query cells based on proximity to the reference cluster  
121 centroids. Finally, to correct unwanted user-specified technical and biological effects in the query data,  
122 Symphony assumes the soft cluster assignments from the previous step and uses stored mixture model

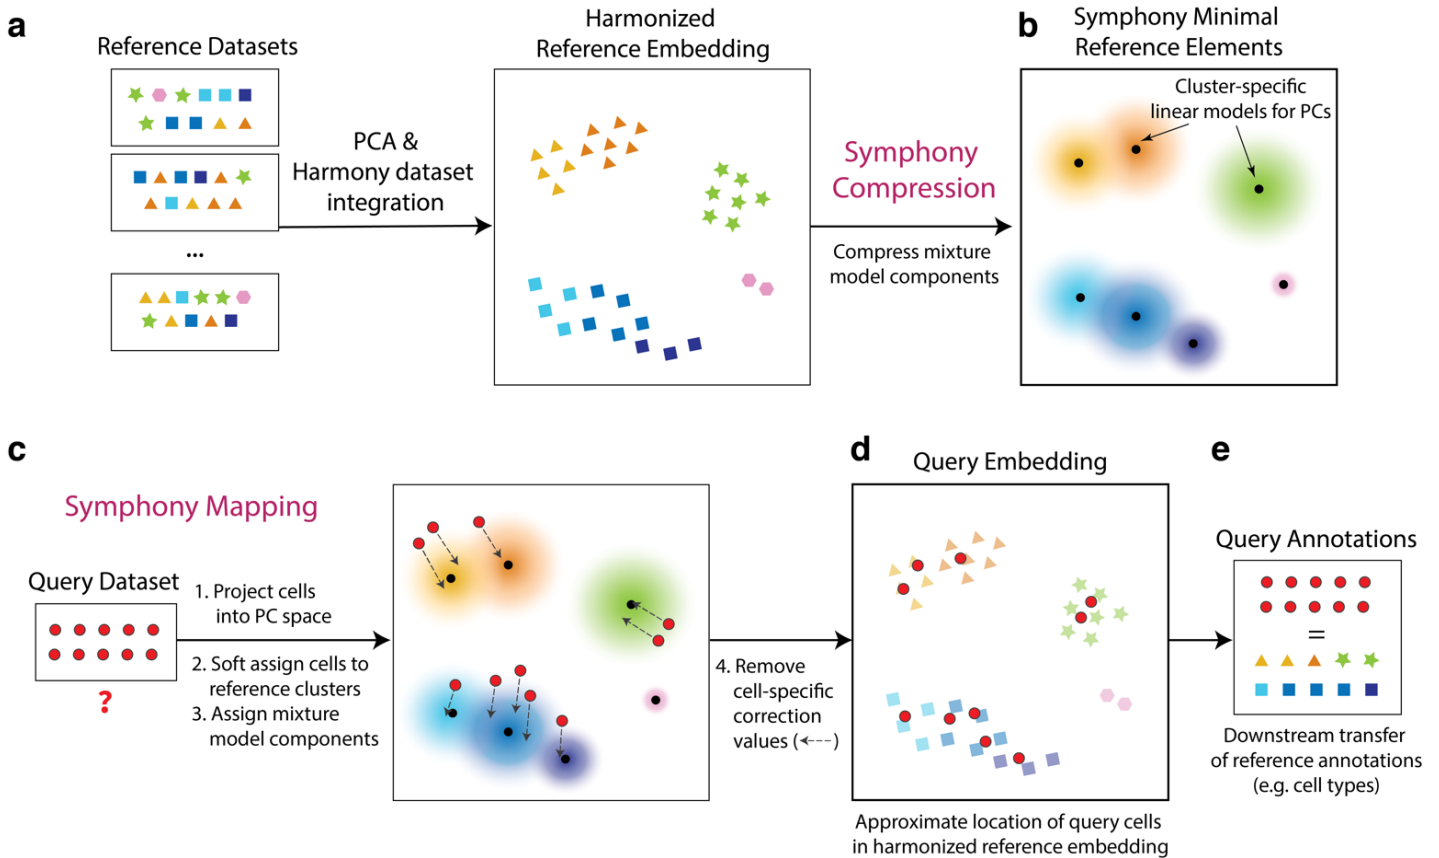

**Figure 1. Symphony Overview.** Symphony comprises two algorithms: Symphony compression (**a-b**) and Symphony mapping (**c-d**). **(a)** To construct a reference atlas, cells from multiple datasets are embedded in a lower-dimensional space (e.g. PCA), in which dataset integration (Harmony) is performed to remove dataset-specific effects. Shape indicates distinct cell types, and color indicates finer-grained cell states. **(b)** Symphony compression represents the information captured within the harmonized reference in a concise, portable format based on computing summary statistics for the reference-dependent components of the linear mixture model. Symphony returns the minimal reference elements needed to efficiently map new query cells to the reference. **(c)** Given an unseen query dataset and compressed reference, Symphony mapping precisely localizes the query cells to their appropriate locations within the integrated reference embedding **(d)**. Reference cell locations do not change during mapping. **(e)** The resulting joint embedding can be used for downstream transfer of reference-defined annotations to the query cells. See Fig. S1.

123 components to estimate and regress out the query batch effects (**Fig. 1d**). Importantly, the reference  
124 cell embedding remains stable during mapping. Embedding the query within the reference coordinates  
125 enables downstream transfer of annotations from reference cells to query cells, including discrete cell  
126 type classifications, quantitative cell states (e.g. position along a trajectory), or expression of missing  
127 genes or proteins (**Fig. 1e**).

## 128 **Symphony approximates *de novo* integration of PBMCs without reintegration of** 129 **reference datasets**

130 As we demonstrate in the **Methods**, Symphony is equivalent to running *de novo* Harmony integration if  
131 three conditions are met: (I) all cell states represented in the query data set are captured by the  
132 reference dataset, (II) the number of query cells is much smaller than the number of reference cells,  
133 and (III) the query dataset has a design matrix that is independent of reference datasets (i.e. non-  
134 overlapping batches in reference and query). As the scope of available single-cell atlases continues to  
135 grow, it is reasonable to assume that reference datasets are large and all-inclusive, making conditions  
136 (I) and (II) well-supported. Condition (III) is also typically met if the query data was generated in  
137 separate experiments from the reference.

138 To demonstrate that Symphony mapping closely approximates running *de novo* integration on  
139 all cells, we applied Symphony to 20,792 peripheral blood mononuclear cells (PBMCs) assayed with  
140 three different 10x technologies: 3'v1, 3'v2, and 5'. We performed three mapping experiments. For  
141 each, we built an integrated Symphony reference from two technologies, then mapped the third  
142 technology as a query. The resulting Symphony embeddings were compared to a gold standard  
143 embedding obtained by running Harmony on all three datasets together. Visually, we found that the  
144 Symphony embedding for each mapping experiment (**Fig. 2a**) closely reproduced the overall structure  
145 and cell type information of the gold standard embedding (**Fig. 2b**). To quantitatively assess the  
146 degrees of dataset mixing we use the Local Inverse Simpson's Index (LISI)<sup>17</sup> metric. For a given  
147 categorical label assigned to each cell (in this case, technology), LISI indicates the effective number of  
148 categories represented in the local neighborhood of each cell; higher LISI scores correspond to better

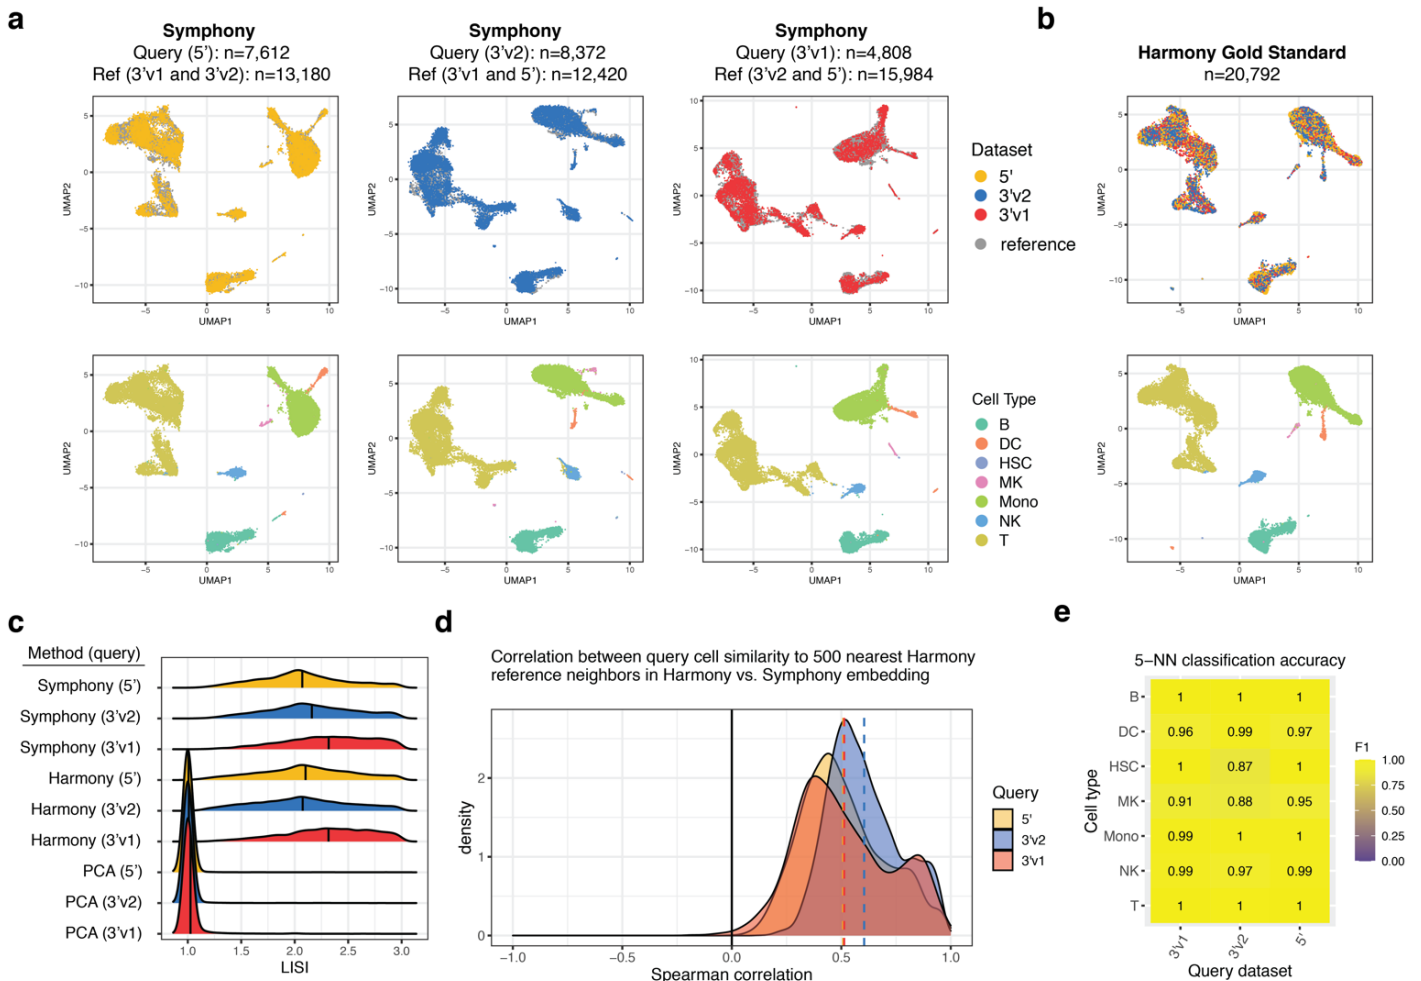

**Figure 2. Symphony approximates *de novo* integration without reintegration of the reference cells.** Three PBMC datasets were sequenced with different 10x protocols: 5' (yellow, n=7,697 cells), 3'v2 (blue, n=8,380 cells), and 3'v1 (red, n=4,809 cells). We ran Symphony three times, each time mapping one dataset onto a reference built from integrating the other two. **(a)** Symphony embeddings generated across the three mapping experiments (columns). Top row: cells colored by query (yellow, blue, or red) or reference (gray), with query cells plotted in front. Bottom row: cells colored by cell type: B cell (B), dendritic cell (DC), hematopoietic stem cell (HSC), megakaryocyte (MK), monocyte (Mono), natural killer cell (NK), or T cell (T), with query cells plotted in front. **(b)** For comparison, gold standard *de novo* Harmony embedding colored by dataset (top) and cell type (bottom). **(c)** Distribution of technology LISI scores for query cell neighborhoods in the Symphony, gold standard, and a standard PCA embeddings on all cells. **(d)** Distribution of k-NN-corr (Spearman correlation between the similarities between the neighbor-pairs in the Harmony embedding and the similarities between the same neighbor-pairs in the Symphony embedding) across query cells for k=500, colored by query dataset. **(e)** Classification accuracy as measured by cell type F1 scores for query cell type annotation using 5-NN on the Symphony embedding. See Fig. S2.



149 mixing of cells across batches. LISI scores in Symphony embeddings (mean LISI 2.16, 95% CI [2.16,  
150 2.17]) and *de novo* integration embeddings (mean LISI 2.14, 95% CI [2.13, 2.15]) were nearly identical  
151 (**Fig. 2c, Methods**).

152 To directly assess similarity of the local neighborhood structures, we computed the correlation  
153 between the local neighborhood adjacency graphs generated by Symphony and *de novo* integration.  
154 We define a new metric called k-nearest-neighbor correlation (k-NN-corr), which quantifies how well the  
155 local neighborhood structure in a given embedding is preserved in an alternative embedding by looking  
156 at the correlation of neighbor cells sorted by distance (**Fig. S2a-e**). Anchoring on each query cell, we  
157 calculate (1) the pairwise similarities to its *k* nearest reference neighbors in the gold standard  
158 embedding and (2) the similarities between the same query-reference neighbor pairs in the alternate  
159 embedding (**Methods**), then calculate the Spearman correlation between (1) and (2). k-NN-corr ranges  
160 from -1 to +1, where +1 indicates a perfectly preserved sorted ordering of neighbors. We find that for  
161 *k*=500, the Symphony embeddings produce a k-NN-corr >0.4 for 77.3% of cells (and positive k-NN-corr  
162 for 99.9% of cells), demonstrating that Symphony not only maps query cells to the correct broad cluster  
163 but also preserves the distance relationships between nearby cells in the same local region (**Fig. 2d**).  
164 As a comparison, we calculated k-NN-corr for a simple PC projection of the query cells (with no  
165 correction step) using the original reference gene loadings prior to integration and observed  
166 significantly lower correlations (Wilcoxon signed-rank  $p < 2.2e-16$ ), with k-NN-corr >0.4 for 39.9% of cells  
167 (**Fig. S2f**).

## 168 **Symphony enables accurate cell type classification of PBMCs across technologies**

169 If Symphony is effective, then cells should be mapped close to cells of the same cell type, enabling  
170 accurate cell type classification. To test this, we performed post-mapping query cell type classification  
171 in the 10x PBMCs example from above. We used a 5-NN classifier to annotate query cells across 7 cell  
172 types based on the nearest reference cells in the harmonized embedding and compared the predictions  
173 to the ground truth labels assigned *a priori* with lineage-specific marker genes (**Methods, Table S2**).  
174 Across all three experiments, predictions using the Symphony embeddings achieved 99.5% accuracy

175 overall, with a median cell type F1-score (harmonic mean of precision and recall, ranging from 0 to 1) of  
176 0.99 (**Fig. 2e, Table S3**). This indicates that Symphony appropriately localizes query cells in  
177 harmonized space to enable the accurate transfer of cell type labels.

178 Automatic cell type classification represents an open area of research<sup>31,35-38</sup>. Existing  
179 supervised classifiers assign a limited set of labels to new cells based on training data and/or marker  
180 genes. To benchmark Symphony-powered downstream inference against existing classifiers, we  
181 followed the same procedure as a benchmarking analysis in Abdelaal et al. (2019)<sup>35</sup>. The benchmark  
182 compared 22 cell type classifiers on the Pbmcbench dataset consisting of two PBMC samples  
183 sequenced using 7 different protocols<sup>39</sup>. For each protocol train-test pair (42 experiments) and donor  
184 train-test pair (additional 6 experiments) (**Methods**), we built a Symphony reference from the training  
185 dataset then mapped the test dataset. We used the resulting harmonized feature embedding to predict  
186 query cell types using three downstream models: 5-NN, SVM with radial kernel, and multinomial logistic  
187 regression. The Symphony-based classifiers achieve consistently high cell type F1-scores (average  
188 median F1 of 0.79-0.83) comparable to the top three supervised classifiers for this benchmark  
189 (scmapcell, singleCellNet, and SCINA, average median F1 of 0.77-0.83) (**Fig. S3a**). Notably, as  
190 discussed in Abdelaal et al., the median F1-score alone can be misleading given that some classifiers  
191 (including SCINA) leave low-confidence cells as “unclassified”, whereas we used Symphony to assign a  
192 label to every cell. This benchmark is also arguably suboptimal in that the reference in each experiment  
193 is comprised of a single dataset (no reference integration involved).

## 194 **Symphony maps against a large reference within seconds**

195 To demonstrate scalability to large reference atlases, we evaluated Symphony’s computational speed.  
196 We downsampled a large memory T cell dataset<sup>40</sup> to create benchmark reference datasets with 20,000,  
197 50,000, 100,000, 250,000, and 500,000 cells (from 12, 30, 58, 156, and 259 donors, respectively).  
198 Against each reference, we mapped three different-sized queries: 1,000, 10,000, and 100,000 cells  
199 (from 1, 6, and 64 donors) and measured total elapsed runtime (**Fig. 3, Table S4**). The speed of the  
200 reference building process is comparable to that of running *de novo* integration since they both start

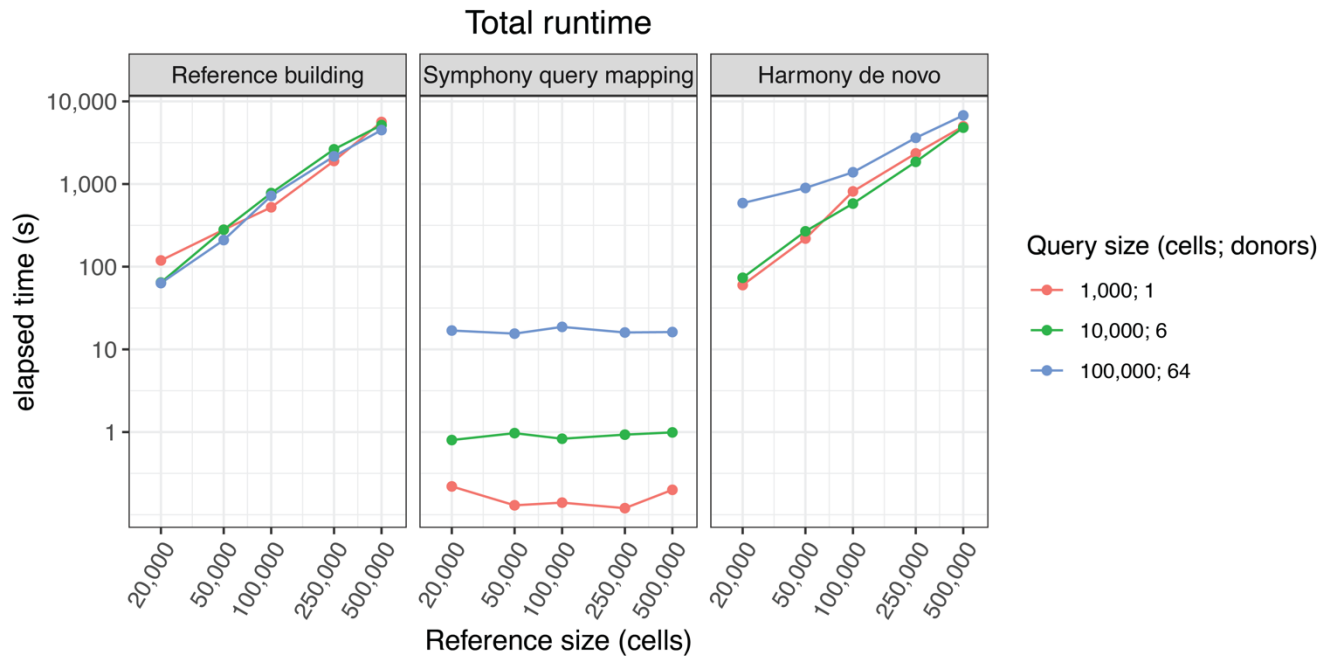

**Figure 3. Symphony scales mapping to large references within seconds.** Total elapsed time (in secs) required to run Symphony reference building starting from gene expression (left), Symphony query mapping starting from query gene expression (middle), or *de novo* Harmony integration (right) for different-sized reference (x-axis) and query (colors) datasets downsampled from the memory T cell CITE-seq dataset. See Table S4.

201 with expression data and require a full pipeline of scaling, PCA, and Harmony integration. However, a  
202 reference need only be built and saved once in order to map all subsequent query datasets onto it. For  
203 instance, initially building a 500,000-cell reference with Symphony took 5,163 seconds (86.1 min) and  
204 mapping a subsequent 10,000-cell query onto it took only 0.99 secs, compared to 4,806 secs (80.1  
205 mins) for *de novo* integration on all cells. Symphony offers a 5000x speedup in this application. These  
206 results show that Symphony scales efficiently to map against multimillion-cell references, enabling it to  
207 power potential web-based queries within seconds.

208         Importantly, Symphony mapping time does not depend on the number of cells or batches in the  
209 reference since the reference cells are modeled post-batch correction (**Methods**); however, it does  
210 depend on the reference complexity (number of centroids  $k$  and dimensions  $d$ ) and number of query  
211 cells and batches (**Table S4**) since the query mapping algorithm solves for the query batch coefficients  
212 for each of the reference-defined clusters.

### 213 **Symphony maps multi-donor, multi-species study to reference of human pancreatic** 214 **islet cells**

215 A query dataset might include data from multiple donors, species, and perturbations that create  
216 confounding signals obscuring biological signal of interest. Integration algorithms remove these signals  
217 in *de novo* analysis, and it is essential that reference mapping removes them too. Therefore, we  
218 designed Symphony to simultaneously handle both tasks: mapping query to reference cells and  
219 integration within the query. To test the ability of Symphony to integrate query datasets during mapping,  
220 we analyzed reference and query datasets of pancreatic islet cells in which both the reference and  
221 query have complex experimental structure (**Fig 4a**). The reference contained 5,887 pancreatic islet  
222 cells from 32 human donors across four independent studies<sup>41-44</sup>, each profiled with a different plate-  
223 based scRNA-seq technology (CEL-seq, CEL-seq2, Smart-seq2, and Fluidigm C1). We manually  
224 annotated cell types using cluster-specific marker genes within each reference dataset separately  
225 (**Methods**). The query contained 8,569 pancreatic islet cells from 4 human donors and 1,866 cells from  
226 2 mice, all profiled with inDrop, a droplet-based scRNA-seq technology absent in the reference<sup>45</sup> (**Fig**

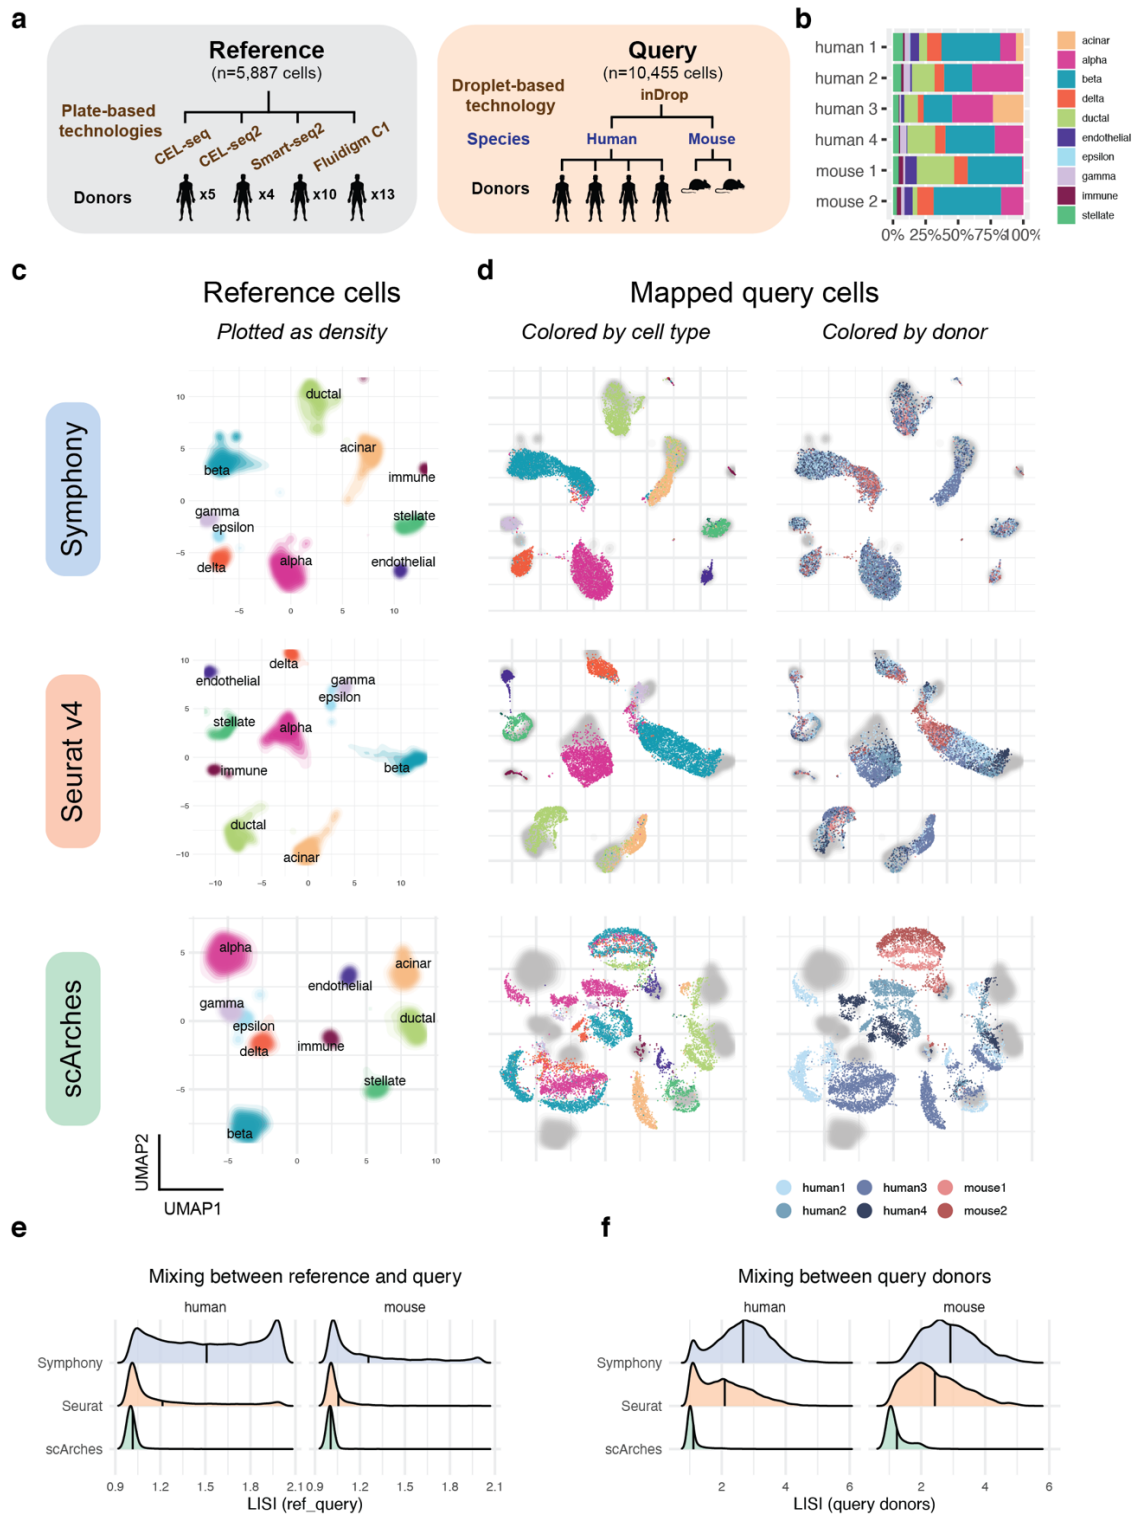

**Figure 4. Symphony maps multi-donor, multi-species study to human pancreatic islet cell reference. (a)** Schematic of mapping experiment with reference ( $n=5,887$  cells, 32 donors) built from four human pancreas datasets and query dataset ( $n=10,455$  cells, from 4 human donors and 2 mouse donors) sequenced on a new technology (inDrop). **(b)** Bar plot shows relative proportions of cell types per query donor. We integrated the reference datasets *de novo* using Harmony, Seurat anchor-based integration, or trVAE, then mapped the query onto the corresponding reference using Symphony, Seurat v4, or scArches, respectively. UMAP plots of resulting joint embeddings showing **(c)** density of integrated reference cells colored by cell type and **(d)** query cells colored by cell type as defined by Baron et al. (left) or donor (right) with reference densities plotted in the back in gray. Degree of integration for each method was measured by LISI metric between reference and query labels **(e)** and LISI between query donors **(f)** for each query cell neighborhood. Distributions of LISI scores for each method faceted by species and normalized to equal height. See Fig. S4 and S5.

227 **4b**). PCA of the query dataset alone demonstrated the magnitude of the confounding species and  
228 donor signals, emphasizing the need for within-query integration (**Fig. S4a**).

229 Symphony mapped the multi-species, multi-donor, droplet-based query into the reference by  
230 effectively and simultaneously removing the effects of species, donor, and technology (**Fig. 4c-d**);  
231 reference mapping obtained superior integration compared to PCA (mean donor LISI=2.72 compared  
232 to 1.45). We predicted that integrating over three nested sources of variation would make it possible to  
233 accurately predict query cell types. Using a simple 5-NN classifier in the harmonized embedding, we  
234 observed accurate cell-type prediction. Using ground truth labels defined by the original publication<sup>45</sup>,  
235 we obtained a median cell type F1-score of 0.96 (overall accuracy 96%) for human and median cell  
236 type F1 of 0.95 (overall accuracy 91%) for mouse cells (**Fig. S4c-d, Table S5**). By mapping against a  
237 reference, Symphony is able to overcome strong species effects and simultaneously map analogous  
238 cell types between mouse and human.

239 Next, we evaluated the ability of the other reference mapping algorithms, scArches and Seurat  
240 v4, to integrate the same query dataset. For each mapping method, we built a reference using its  
241 compatible *de novo* integration method (**Methods, Fig. 4c, S4b**). Symphony obtained higher levels of  
242 integration than did Seurat and scArches, both between reference and query as well as donors within  
243 the query (**Fig. 4e-f**). Symphony mapping achieves comparable donor mixing to that of Harmony *de*  
244 *novo* integration of all five datasets (mean mapping LISI=2.67 vs *de novo* LISI=2.55 in human, 2.91 vs  
245 2.7 in mouse). In contrast, the other mapping methods return less integrated embeddings, when  
246 compared to their corresponding *de novo* methods (mean mapping LISI=2.09 vs *de novo* LISI=2.83 for  
247 Seurat in human, 2.43 vs 2.67 in mouse; 1.12 vs 2.52 for scArches/trVAE in human, and 1.24 vs 3.05 in  
248 mouse; **Table S6**). We then evaluated the accuracy of each mapping with 5-NN cell type classification  
249 (**Methods**). We observed that Symphony and Seurat performed comparably well, and both  
250 outperformed scArches on both human and mouse cell type prediction (**Fig. S4c-d, Table S5**).  
251 Symphony was 1-2 orders of magnitude faster (1.4 s) than either Seurat (31.7 s) or scArches (381.5 s)  
252 mapping on this example (**Table S6**).

## 253 **Localizing query cells along a reference-defined trajectory of human fetal liver** 254 **hematopoiesis**

255 A successful mapping method should position cells not only within cell type clusters but also along  
256 smooth transcriptional gradients, commonly used to model differentiation and activation processes over  
257 time (**Fig. 5a**). To test Symphony in a gradient mapping context, we built and mapped to a reference  
258 atlas profiling human fetal liver hematopoiesis, containing 113,063 liver cells from 14 donors spanning  
259 7-17 post-conceptual weeks of age and 27 author-defined cell types, sequenced with 10x 3' chemistry  
260 (**Fig. 5b, Fig. S6a**)<sup>46</sup>. Trajectory analysis of immune populations with the force directed graph (FDG)  
261 algorithm<sup>46</sup> highlights relationships among progenitor and differentiated cell types (**Fig. 5c**). Notably, the  
262 hematopoietic stem cell and multipotent progenitor population branches into three major trajectories,  
263 representing the lymphoid, myeloid, and megakaryocyte-erythroid-mast (MEM) lineages. This reference  
264 contains two forms of annotation for downstream query inference: discrete cell types and positions  
265 along differentiation gradients.

266 We mapped a query consisting of 21,414 new cells from 5 of the original 14 donors, sequenced  
267 with 10x 5' chemistry. We first inferred query cell types with k-NN classification (**Methods**) and  
268 confirmed accurate cell type assignment based on the authors' independent query annotations<sup>46</sup>  
269 (median cell type F1=0.92 across 14 held-out donor experiments within 3' dataset only, median cell  
270 type F1=0.83 for the 5'-to-3' experiment; **Fig. S7, Table S7**). To evaluate query trajectory inference, we  
271 used the Symphony joint embedding to position query cells from the MEM lineage (n=5,141) in the  
272 reference-defined trajectory by averaging the 10 nearest reference cell FDG coordinates. The inferred  
273 query trajectory (**Fig. 5d**) recapitulated known branching from MEM progenitors (MEMPs, brown) into  
274 distinct megakaryocyte (green), erythroid (blue, pink), and mast cell (yellow) lineages. Moreover,  
275 transitions from MEMPs to differentiated types were marked by gradual changes in canonical marker  
276 genes (**Fig. 5e**): *PPBP* for megakaryocytes, *HBB* for erythrocytes, and *KIT* for mast cells. These  
277 gradual expression patterns are consistent with correct placement of query cells along differentiation  
278 gradients.



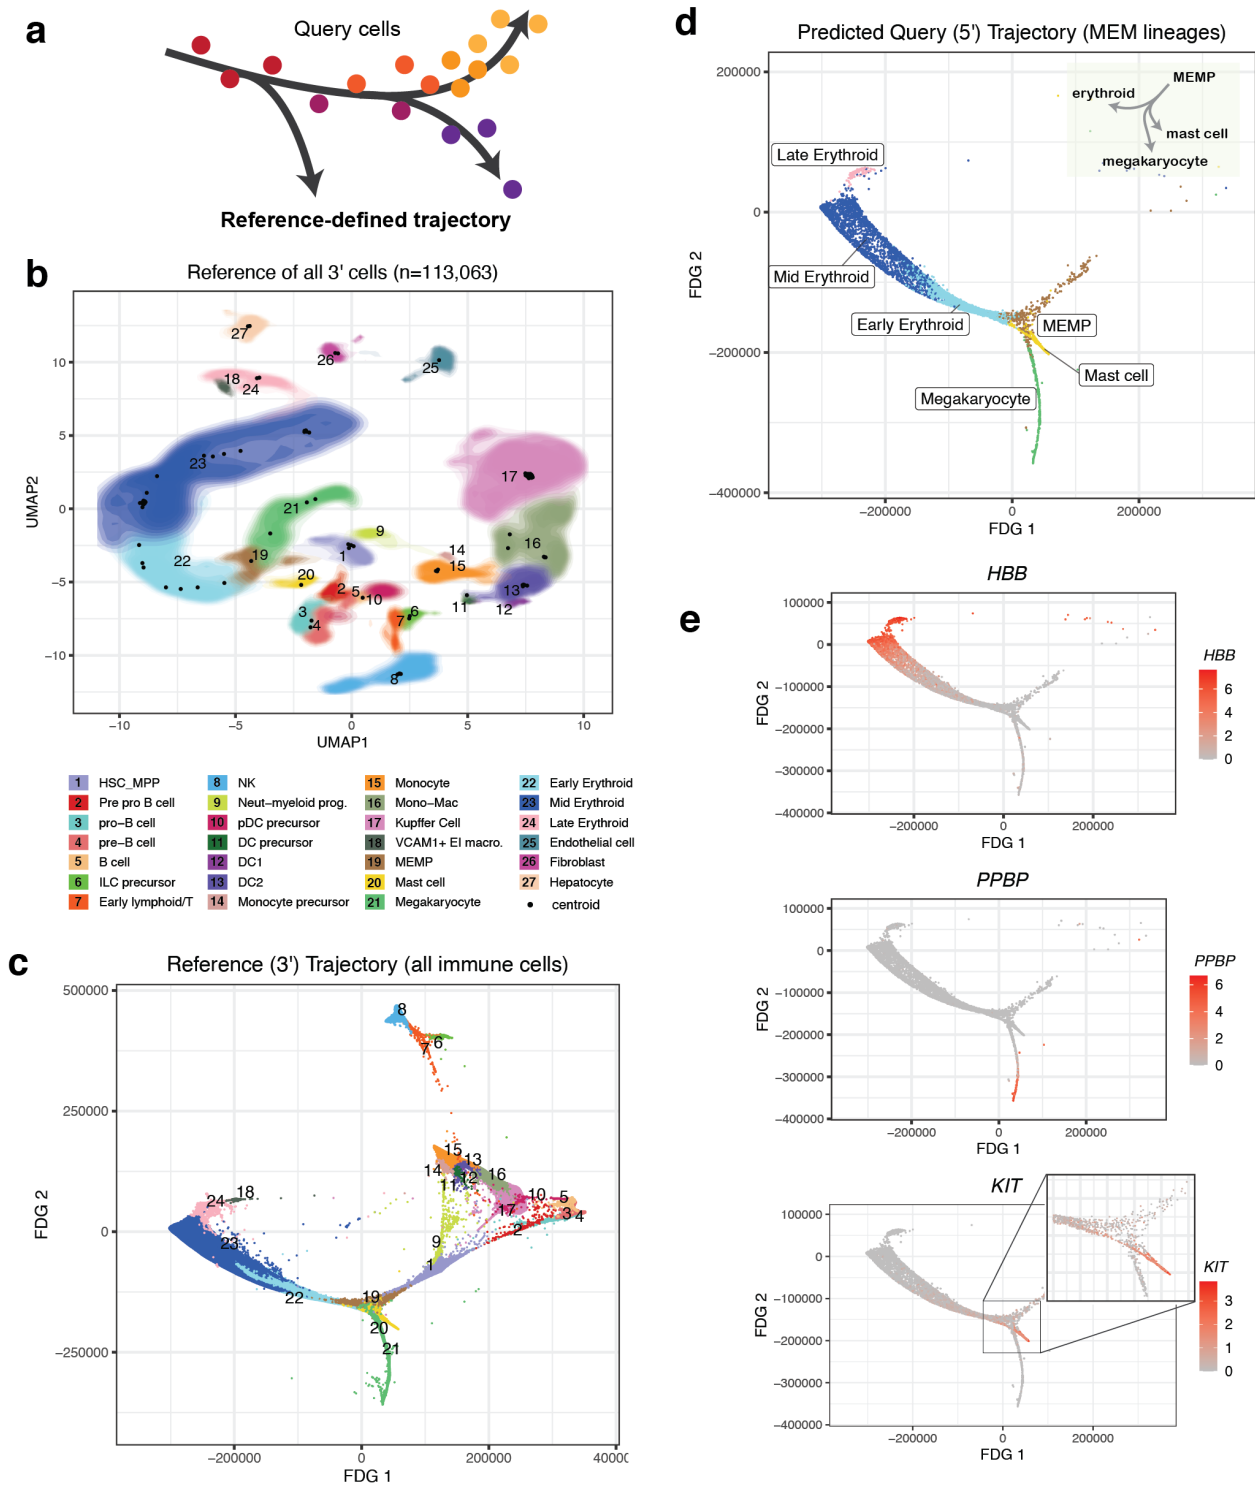

**Figure 5. Localizing query cells along a trajectory of fetal liver hematopoiesis.** (a) Symphony can precisely place query cells along a reference-defined trajectory. The reference (n=113,063 cells, 14 donors) was sequenced using 10x 3' chemistry, and the query (n=25,367 cells, 5 donors) was sequenced with 10x 5' chemistry. (b) Symphony reference colored by cell types as defined by Popescu et al. (2019). Contour fill represents density of cells. Black points represent soft-cluster centroids in the Symphony mixture model. (c) Reference developmental trajectory of 3'-sequenced immune cells (FDG coordinates obtained from original authors). Query cells in the MEM lineages (n=5,141 cells) were mapped against the reference and query coordinates along the trajectory were predicted with 10-NN (d). The inferred query trajectory preserves branching within the MEM lineages, placing terminally differentiated states on the ends. (e) Expression of lineage marker genes (*PPBP* for megakaryocytes, *HBB* for erythroid cells, and *KIT* for mast cells). Cells colored by log-normalized expression of gene. See Fig. S6 and S7.



## 279 **Inferring query surface protein marker expression by mapping to a reference assayed** 280 **with CITE-seq**

281 Recent technological advances in multimodal single-cell technologies (e.g., CITE-seq) make it possible  
282 to simultaneously measure mRNA and surface protein expression from the same cells using  
283 oligonucleotide-tagged antibodies<sup>47,48</sup>. With Symphony, we can construct a reference from these data,  
284 map query cells from experiments that measure only mRNA expression, and infer surface protein  
285 expression for the query cells to expand possible analyses and interpretations (**Fig. 6a**).

286 To demonstrate this, we used a CITE-seq dataset that measures the expression of whole-  
287 transcriptome mRNA and 30 surface proteins on 500,089 peripheral blood memory T cells from 271  
288 samples<sup>40</sup>. We leveraged both mRNA and protein features to build a multimodal reference from 80% of  
289 samples (n=217) and map the remaining 20% of samples (n=54). Instead of using PCA, which is best  
290 for one modality<sup>49</sup>, we used canonical correlation analysis (CCA) to embed reference cells into a space  
291 that leverages both. Specifically, CCA constructs a pair of correlated low-dimensional embeddings, one  
292 for mRNA and one for protein features, each with a linear projection function akin to gene loadings in  
293 PCA. We corrected reference batch effects in CCA space with Harmony and built a Symphony  
294 reference (**Fig. 6b**), saving the gene loadings for the CCA embedding from mRNA features. Then, we  
295 mapped the held-out query using only mRNA expression to mimic a unimodal scRNA-seq experiment,  
296 reserving the measured query protein expression as a ground truth for validation. We accurately  
297 predicted the surface protein expression of each query cell using the 50-NN average from the reference  
298 cells in the harmonized embedding. For all proteins, we found strong concordance between predicted  
299 and (50-NN smoothed) measured expression (Pearson r: 0.88-0.99, **Fig. 6c-d**). For all but three  
300 proteins, we achieved comparable results with as few as 5 or 10 nearest neighbors (**Fig. S8a**).

301 We note that it is also possible to conduct the same analysis with a unimodal PCA-based  
302 reference built from the cells' mRNA expression only. This approach has slightly worse performance for  
303 some proteins (Pearson r: 0.65-0.97, **Fig. S8b-d**), demonstrating that a reference built jointly on both  
304 mRNA and protein permits better inference of protein expression than an mRNA-only reference, which

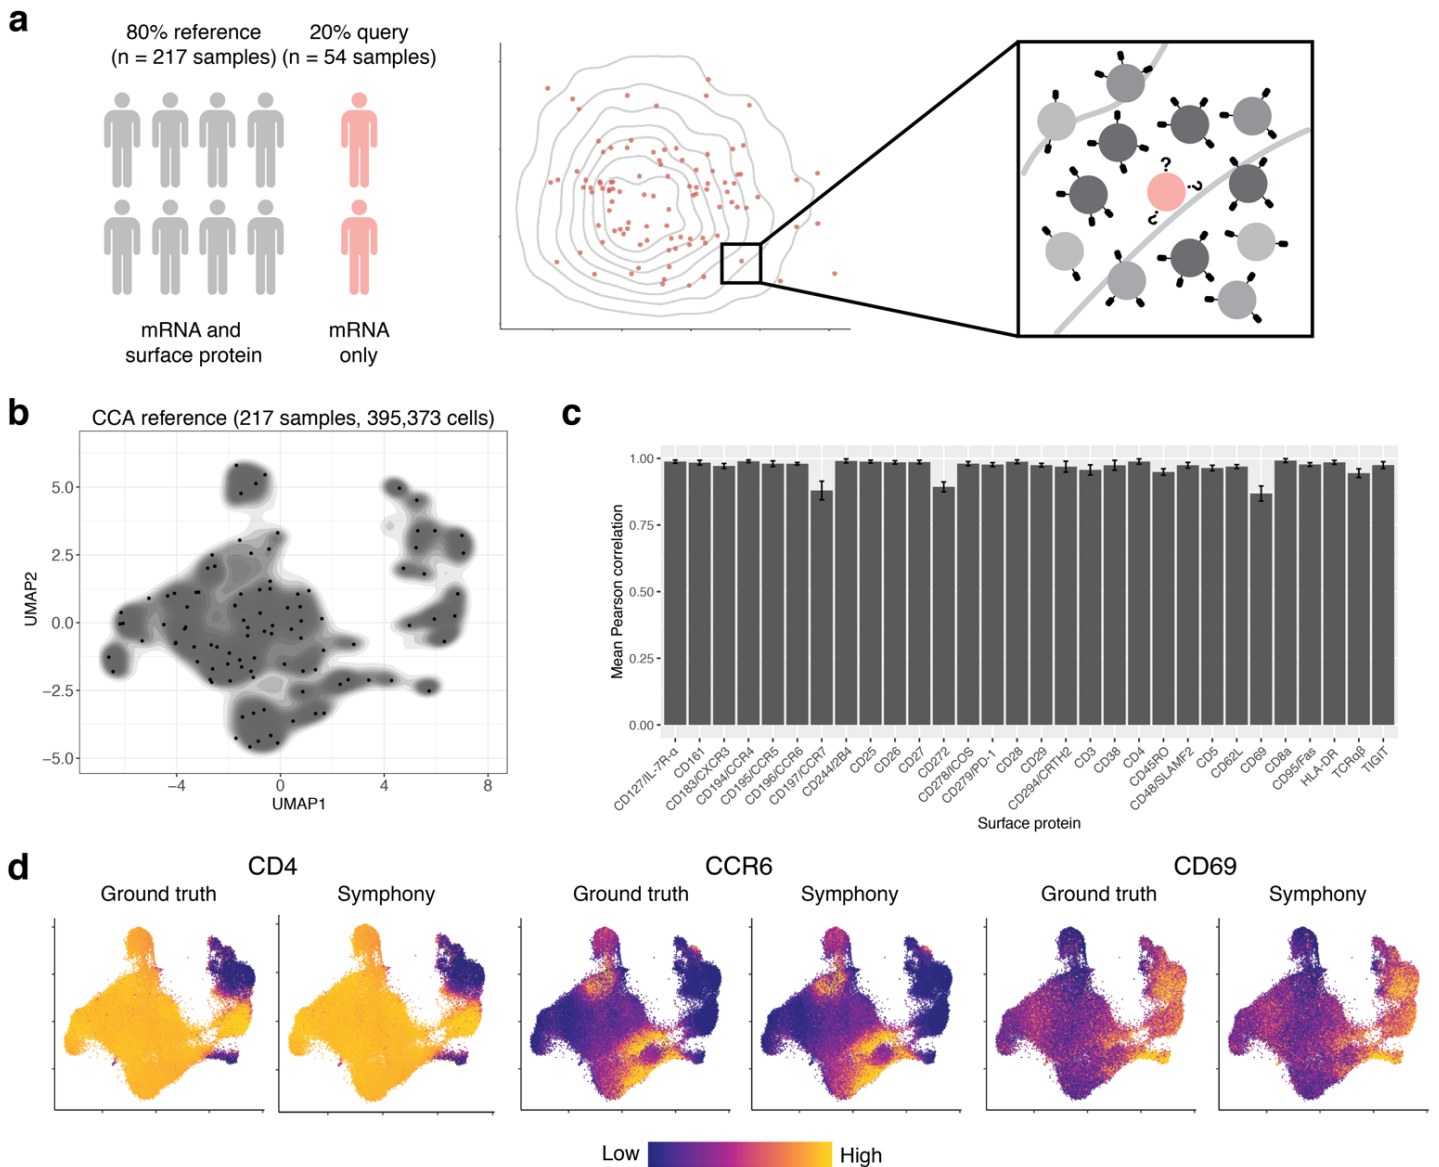

**Figure 6. Mapping onto a multimodal reference to infer query surface protein expression in memory T cells. (a)** Schematic of multimodal mapping experiment. The dataset was divided into training and test sets (80% and 20% of samples, respectively). The training set was used to build a Symphony reference, and the test set was mapped onto the reference to predict surface protein expression in query cells (pink) based on 50-NN reference cells (gray). **(b)** Symphony reference built from mRNA/protein CCA embedding. Contour fill represents density of reference cells. Black points represent soft-cluster centroids in the Symphony mixture model. **(c)** We measured the accuracy of protein expression prediction with the Pearson correlation between predicted and ground truth expression for each surface protein across query cells in each donor. Bar height represents the average per-donor correlation for each protein, and error bars represent standard deviation. **(d)** Ground truth and predicted expression of CD4, CCR6, and CD69 based on CCA reference. Ground truth is the 50-NN-smoothed expression measured in the CITE-seq experiment. Colors are scaled independently for each marker from minimum (blue) to maximum (yellow) expression. See Fig. S8.

305 is consistent with previous observations that mRNA expression is not fully representative of protein  
306 expression<sup>47,48</sup>. This analysis highlights how users can start with a low-dimensional embedding other  
307 than PCA, such as CCA, to better capture rich multimodal information in the reference.

## 308 Discussion

309 Mapping query cells into large, annotated references in real time and without the need to share  
310 sensitive information from the reference datasets is becoming increasingly important for reproducible  
311 single-cell analysis. We approached this inherently complex, big-data problem using well-established  
312 mathematical methods from integration analysis. We framed reference mapping as a specialized case  
313 of integration between one relatively small dataset and a second larger, more comprehensive, and  
314 previously integrated dataset. Because the reference is already integrated, it is natural to use the same  
315 mathematical framework from the integration to perform mapping. For instance, the scArches<sup>28</sup>  
316 algorithm uses an autoencoder-based framework to map to references built with autoencoder-based  
317 integration algorithms<sup>32,33</sup>. Similarly, Symphony uses the mixture modeling framework to map to  
318 references built with Harmony mixture modeling integration. Symphony compresses the reference by  
319 extracting relevant reference-derived parameters from the mixture model to map query cells in  
320 seconds. With this compression, references can be distributed without the need to share raw  
321 expression data or donor-level metadata, which enables data privacy<sup>50</sup>. Symphony compression greatly  
322 reduces the size of a reference dataset: for the memory T cell dataset of 500,089 cells, the raw  
323 expression matrix is 8.9 GB, whereas the Symphony minimal reference elements are 1.3 MB.

324 Useful reference atlases contain annotations absent in the query, such as cell type labels (**Fig.**  
325 **4**), trajectory coordinates (**Fig. 5**), or multimodal measurements (**Fig. 6**). Transfer of these annotations  
326 from reference to query is an open area of research that includes algorithms for automated cell type  
327 classification<sup>31,35-38</sup>. We approach annotation transfer in two steps. We first learn a predictive model in  
328 the reference embedding, and then map query cells and use their reference coordinates to predict  
329 query annotations. In this two-step approach, Symphony mapping provides a feature space but is  
330 otherwise independent from the choice of downstream inference model. In PBMC type prediction (**Fig.**

331 **S3**), we used Symphony embeddings to train multiple competitive classifiers: k-NN, SVM, and logistic  
332 regression. In our analyses, we were encouraged to find that a simple k-NN classifier can achieve high  
333 performance with only 5-10 neighbors. In practice, users can choose more complex inference models if  
334 it is warranted for certain annotation types. Moreover, we expect prediction results to improve with more  
335 accurate and reproducible annotation methods, such as consistent cell type taxonomies provided by  
336 the Cell Ontology<sup>51</sup> project and better modeling of multimodal expression data<sup>52</sup>.

337 Because mapping is a special case of integration, we expected Symphony mapping to  
338 recapitulate the results of *de novo* Harmony integration. To this end, we defined three conditions under  
339 which Symphony and *de novo* integration with Harmony yield equivalent results. In subsequent  
340 examples, we showed that Symphony still performs well when the last two conditions are relaxed. The  
341 pancreas query contains more cells than its reference (**condition II**), while the liver hematopoiesis  
342 reference and query overlap in donors (**condition III**). Condition I, which requires comprehensive cell  
343 type coverage in the reference, is less flexible. When the query contains a brand new cell type, it will be  
344 aligned to its most transcriptionally similar reference cluster. Note that condition I only pertains to cell  
345 types and not clinical and biological contexts. For instance, we successfully mapped mouse pancreas  
346 query to an entirely human pancreas reference (**Fig. 4**), because the same pancreatic cell types are  
347 shared in both species. Mapping novel cell types is a current limitation and important direction for future  
348 work. For now, we advise users interested in novel cell type discovery to supplement a Symphony  
349 analysis with *de novo* analyses of the query alone.

350 Instead of one monolithic reference for all cell types across all tissues and disease, we expect  
351 the proliferation of multiple, well-annotated specialized references that focus on fine-grained modeling  
352 of diverse biological systems. For instance, the memory T cell reference (**Fig. 6**) will be useful to  
353 annotate fine-grained T cell states, while an unsorted PBMC reference (**Fig. 2**) would better suit  
354 coarse-grained annotation of multiple immune populations. Similarly, a reference with only healthy  
355 individuals is useful for annotation of cell types, while a reference with both healthy and diseased  
356 individuals is useful for annotation of cell types and pathological cell states. We advise Symphony users

357 to carefully select the appropriate reference atlas for their study and potentially map to multiple  
358 references, as needed. For instance, one may use a PBMC reference to identify and isolate T cells and  
359 a memory T cell reference to assign fine-grained labels to query T cells.

360 As large-scale tissue and whole-organism single-cell reference atlases become available in the  
361 near future, Symphony will enable investigators to leverage the rich information in these references to  
362 perform integrative analyses and transfer reference coordinates and diverse annotations to new  
363 datasets in a rapid and reproducible manner.

## 364 Acknowledgements

365 We thank members of the Raychaudhuri Lab for helpful feedback and comments. We thank members  
366 of the Tuberculosis Research Unit (TBRU) LIMAA and Socios En Salud, in particular Megan Murray,  
367 Jessica Beynor, Yuriy Baglaenko, Sara Suliman, Ildiko van Rhijn, and Leonid Lecca, for their  
368 contributions to generating the memory T cell dataset. We would also like to thank Issac Goh, Muzlifah  
369 Haniffa, and other members of the Haniffa Lab for graciously providing preprocessed datasets from  
370 their fetal liver hematopoiesis study. This work is supported in part by funding from the National  
371 Institutes of Health (1UH2AR067677, U19 AI111224, U01 HG009379, 1R01AR073833, and  
372 R01AR063759). The project described was supported by award Number T32GM007753 from the  
373 National Institute of General Medical Sciences (JBK). The content is solely the responsibility of the  
374 authors and does not necessarily represent the official views of the National Institute of General  
375 Medical Sciences or the National Institutes of Health.

## 376 Author contributions

377 I.K., J.B.K., and S.R. conceived the project. J.B.K. and I.K. developed the method and performed the  
378 analyses under the guidance of S.R. F.Z. assisted with benchmarking. S.R., A.N., and D.B.M.  
379 contributed to generating the memory T cell dataset. A.N. performed analysis of the memory T cell  
380 dataset. All authors participated in interpretation and writing the manuscript.

## 381 Declaration of interests

382 SR receives research support from Biogen.

## 383 Figure Legends

384 **Figure 1. Symphony Overview.** Symphony comprises two algorithms: Symphony compression **(a-b)**  
385 and Symphony mapping **(c-d)**. **(a)** To construct a reference atlas, cells from multiple datasets are  
386 embedded in a lower-dimensional space (e.g. PCA), in which dataset integration (Harmony) is  
387 performed to remove dataset-specific effects. Shape indicates distinct cell types, and color indicates  
388 finer-grained cell states. **(b)** Symphony compression represents the information captured within the  
389 harmonized reference in a concise, portable format based on computing summary statistics for the  
390 reference-dependent components of the linear mixture model. Symphony returns the minimal reference  
391 elements needed to efficiently map new query cells to the reference. **(c)** Given an unseen query  
392 dataset and compressed reference, Symphony mapping precisely localizes the query cells to their  
393 appropriate locations within the integrated reference embedding **(d)**. Reference cell locations do not  
394 change during mapping. **(e)** The resulting joint embedding can be used for downstream transfer of  
395 reference-defined annotations to the query cells. See Fig. S1.

396 **Figure 2. Symphony approximates *de novo* integration without reintegration of the reference**  
397 **cells.** Three PBMC datasets were sequenced with different 10x protocols: 5' (yellow, n=7,697 cells),  
398 3'v2 (blue, n=8,380 cells), and 3'v1 (red, n=4,809 cells). We ran Symphony three times, each time  
399 mapping one dataset onto a reference built from integrating the other two. **(a)** Symphony embeddings  
400 generated across the three mapping experiments (columns). Top row: cells colored by query (yellow,  
401 blue, or red) or reference (gray), with query cells plotted in front. Bottom row: cells colored by cell type:  
402 B cell (B), dendritic cell (DC), hematopoietic stem cell (HSC), megakaryocyte (MK), monocyte (Mono),  
403 natural killer cell (NK), or T cell (T), with query cells plotted in front. **(b)** For comparison, gold standard  
404 *de novo* Harmony embedding colored by dataset (top) and cell type (bottom). **(c)** Distribution of

405 technology LISI scores for query cell neighborhoods in the Symphony, gold standard, and a standard  
406 PCA embeddings on all cells. **(d)** Distribution of k-NN-corr (Spearman correlation between the  
407 similarities between the neighbor-pairs in the Harmony embedding and the similarities between the  
408 same neighbor-pairs in the Symphony embedding) across query cells for k=500, colored by query  
409 dataset. **(e)** Classification accuracy as measured by cell type F1 scores for query cell type annotation  
410 using 5-NN on the Symphony embedding. See Fig. S2.

411 **Figure 3. Symphony scales mapping to large references within seconds.** Total elapsed time (in  
412 secs) required to run Symphony reference building starting from gene expression (left), Symphony  
413 query mapping starting from query gene expression (middle), or *de novo* Harmony integration (right) for  
414 different-sized reference (x-axis) and query (colors) datasets downsampled from the memory T cell  
415 CITE-seq dataset. See Table S4.

416 **Figure 4. Symphony maps multi-donor, multi-species study to human pancreatic islet cell**  
417 **reference. (a)** Schematic of mapping experiment with reference (n=5,887 cells, 32 donors) built from  
418 four human pancreas datasets and query dataset (n=10,455 cells, from 4 human donors and 2 mouse  
419 donors) sequenced on a new technology (inDrop). **(b)** Bar plot shows relative proportions of cell types  
420 per query donor. We integrated the reference datasets *de novo* using Harmony, Seurat anchor-based  
421 integration, or trVAE, then mapped the query onto the corresponding reference using Symphony,  
422 Seurat v4, or scArches, respectively. UMAP plots of the resulting joint embeddings showing **(c)** density  
423 of integrated reference cells colored by cell type and **(d)** query cells colored by cell type as defined by  
424 Baron et al. (left) or donor identity (right) with reference densities plotted in the back in gray. Degree of  
425 integration for each method was measured by LISI metric between reference and query labels **(e)** and  
426 LISI between query donors **(f)** for each query cell neighborhood. Distributions of LISI scores for each  
427 method faceted by species and normalized to equal height. See Fig. S4 and S5.

428 **Figure 5. Localizing query cells along a trajectory of fetal liver hematopoiesis. (a)** Symphony can  
429 precisely place query cells along a reference-defined trajectory. The reference (n=113,063 cells, 14  
430 donors) was sequenced using 10x 3' chemistry, and the query (n=25,367 cells, 5 donors) was



431 sequenced with 10x 5' chemistry. **(b)** Symphony reference colored by cell types as defined by Popescu  
432 et al. (2019). Contour fill represents density of cells. Black points represent soft-cluster centroids in the  
433 Symphony mixture model. **(c)** Reference developmental trajectory of 3'-sequenced immune cells (FDG  
434 coordinates obtained from original authors). Query cells in the MEM lineages (n=5,141 cells) were  
435 mapped against the reference and query coordinates along the trajectory were predicted with 10-NN  
436 **(d)**. The inferred query trajectory preserves branching within the MEM lineages, placing terminally  
437 differentiated states on the ends. **(e)** Expression of lineage marker genes (*PPBP* for megakaryocytes,  
438 *HBB* for erythroid cells, and *KIT* for mast cells). Cells colored by log-normalized expression of gene.  
439 See Fig. S6 and S7.

440 **Figure 6. Mapping onto a multimodal reference to infer query surface protein expression in**  
441 **memory T cells. (a)** Schematic of multimodal mapping experiment. The dataset was divided into  
442 training and test sets (80% and 20% of samples, respectively). The training set was used to build a  
443 Symphony reference, and the test set was mapped onto the reference to predict surface protein  
444 expression in query cells (pink) based on 50-NN reference cells (gray). **(b)** Symphony reference built  
445 from mRNA/protein CCA embedding. Contour fill represents density of reference cells. Black points  
446 represent soft-cluster centroids in the Symphony mixture model. **(c)** We measured the accuracy of  
447 protein expression prediction with the Pearson correlation between predicted and ground truth  
448 expression for each surface protein across query cells in each donor. Bar height represents the  
449 average per-donor correlation for each protein, and error bars represent standard deviation. **(d)** Ground  
450 truth and predicted expression of CD4, CCR6, and CD69 based on CCA reference. Ground truth is the  
451 50-NN-smoothed expression measured in the CITE-seq experiment. Colors are scaled independently  
452 for each marker from minimum (blue) to maximum (yellow) expression. See Fig. S8.

453

454 **Supplementary Figure 1. Overview of reference mapping pipeline and Symphony data**  
455 **structures. (a)** The overall analysis pipeline comprises various functions (orange boxes) that each  
456 perform a transformation on the data. Symphony mapping takes in a query gene expression matrix and



457 a Symphony reference built from integrated reference datasets, and outputs the query cell locations in  
458 the harmonized feature embedding. Models trained on the reference feature embedding (e.g. cell type  
459 classifier) can transfer annotations to the query for various downstream tasks. **(b)** Steps of reference  
460 building algorithm. Reference datasets spanning multiple batches are aggregated into a single  
461 expression matrix on which PCA and Harmony integration is performed. The output of reference  
462 compression is the Symphony minimal reference elements, consisting of data structures  $\mu, \sigma, U, Y_{cos},$   
463  $N_r,$  and  $C$  (red symbols).  $Z_{r\_corr}$  (the harmonized reference embedding) is not used for the mapping  
464 calculation but is saved for downstream annotation transfer. **(c)** Steps of query mapping algorithm,  
465 indicating where each reference element is used. Query cells are projected into reference PCA space,  
466 clustered to reference centroids, and corrected to harmonized space by removing query batch effects.

467 **Supplementary Figure 2. Nearest neighbor correlation (k-NN-corr) metric.** The k-NN-correlation  
468 metric assesses how well an alternative embedding recapitulates the structure of a gold standard  
469 embedding. k-NN-corr is asymmetric in that it matters which of the two embeddings is selected as the  
470 gold standard. Consider a gold standard embedding **(a)** and two alternative embeddings **(b)** and **(c)**,  
471 representing a good mapping and a bad mapping, respectively. For a given query cell  $q$  (red), we  
472 identify its top  $k$  nearest reference (gray) neighbors in the gold standard embedding ( $k = 3$  depicted)  
473 and calculate the similarity between the query cell and each neighbor. The similarities between the  
474 same query-reference neighbor pairs are then calculated in the alternate embedding. k-NN-corr is the  
475 Spearman correlation between the similarities in the gold standard vs. alternative embedding, ranging  
476 from -1 to +1. Example k-NN-corr for one query cell and  $k = 500$  for the **(d)** Symphony embedding and  
477 **(e)** PCA projection embedding. **(f)** k-NN-corr distribution across query cells for  $k=500$  and a gold  
478 standard Harmony embedding, for either the Symphony embeddings (blue) or a simple PCA projection  
479 with no correction step (red), faceted by query dataset.

480 **Supplementary Figure 3. Symphony performance against automatic cell type classifiers.**

481 Following the cross-technology PBMC benchmarking experiment from Abdelaal et al. (2019), we ran a  
482 total of 48 train-test experiments per Symphony-based classifier. Two different versions of the

483 Symphony feature embeddings were generated depending on variable gene selection method: top  
484 2000 variable genes (vargenes) or top 20 differentially genes (DEGs) expressed per cell type.  
485 Symphony embeddings were used to train 3 downstream classifiers: k-NN (k=5), SVM with radial  
486 kernel, and multinomial logistic regression (glmnet) with ridge. **(a)** Symphony (orange) median cell-type  
487 F1 score across 48 train-test experiments compared to supervised methods (green), demonstrating  
488 noninferiority to the top supervised methods and stable performance regardless of downstream  
489 classification method. Red dot indicates mean of median F1 scores across 48 experiments (used for  
490 ordering the methods along the x-axis). **(b, c)** Median cell type F1 score across 48 experiments for the  
491 5-NN classifier with variable gene selection **(b)** and DEG selection **(c)**. Non-diagonal values represent  
492 train on one technology, test on another (42 experiments, all with donor 1). Values along the diagonal  
493 indicate train on donor 1, test on donor 2 of the same technology (6 experiments; missing square  
494 because donor 2 not sequenced with 10x v3).

495 **Supplementary Figure 4. Comparison of Symphony to alternative reference mapping methods**  
496 **on a cross-species pancreatic islet cell benchmark. (a)** Standard PCA pipeline applied to the Baron  
497 et al. query dataset exhibits strong species and donor effects, demonstrating the need for within-query  
498 integration. We benchmarked Symphony mapping (on a Harmony-integrated reference), Seurat v4  
499 mapping (on a Seurat anchor-based-integrated reference), and scArches mapping (on a trVAE-  
500 integrated reference). For each approach, we built an integrated reference **(b)**, mapped the query, then  
501 predicted query cell types using a 5-NN classifier to transfer annotations using the respective reference  
502 embedding. **(c)** Query cell prediction accuracy by species for each method as measured by cell type F1  
503 score, with author-defined ground truth labels. Mouse samples did not have acinar or epsilon cells. The  
504 resulting joint cell embedding for each tool was visualized by UMAP **(b, d)**: **(b)** Reference cells colored  
505 by dataset/technology. **(d)** Query cells colored by correct (green) or incorrect (red) cell type prediction.

506 **Supplementary Figure 5. Comparison of *de novo* integration methods for harmonizing all five**  
507 **pancreatic islet cell datasets.** As a comparison to reference mapping (Fig 3), we integrated all five  
508 pancreatic islet cell technologies (n=16,342 cells) using 3 *de novo* integration methods: Harmony,

509 Seurat anchor-based integration, and trVAE. UMAP visualizations for the integrated embedding colored  
510 by batch **(a)** and cell types **(b)** for each method. Cell types for reference datasets (c1, celseq, celseq2,  
511 smartseq) were defined within each dataset separately based on marker genes. Query cell types were  
512 defined by Baron et al. Degree of mixing between reference and query datasets **(c)** and mixing  
513 between query donors **(d)** was measured with LISI metric on query cell neighborhoods for each  
514 method, demonstrating equivalent mixing among *de novo* integration methods (compare to Fig 3d-e).

515 **Supplementary Figure 6. Mapping to a fetal liver hematopoiesis trajectory. (a)** Size and cell type  
516 composition of each donor sample in the 10x 3' dataset across 27 author-defined cell types from  
517 Popescu et al. (2019). pcw = post-conception weeks. **(b)** Library complexity for each sample in 10x 3'  
518 and 10x 5' datasets, showing low complexity for donor F2 and F5 5'-sequenced samples (removed  
519 from further analysis). **(c)** UMAP projections of query cells into reference UMAP space after Symphony  
520 mapping, faceted by query donor, colored by cell type. Reference UMAP embedding in bottom-right.

521 **Supplementary Figure 7. Fetal liver hematopoiesis cell type classification confusion matrices.**  
522 We performed two versions of the reference mapping experiments to assess cell type classification  
523 accuracy across 27 fine-grained cell types: (1) using exclusively 10x 3' data, we mapped one held-out  
524 donor against a reference constructed from the remaining 13 donors (total 14 mapping experiments),  
525 (2) mapping all 10x 5' cells against all 10x 3' cells. Cell type confusion matrices are shown for a 30-NN  
526 cell type classifier **(a)** aggregated across the 14 held-out donor experiments using exclusively 3' data  
527 and **(b)** the 5'-to-3' experiment mapping the full 5' query (n=21,414, n=5 donors) against the full 3'  
528 reference (n=113,063 cells, 14 donors), colored by the proportion of the true cell type that was  
529 classified correctly. True cell type is defined by the original authors (Popescu et al., 2019). Rows (true  
530 query cell types) are sorted by hierarchical clustering on the average gene expression (all genes) for  
531 the cell types to order similar types together. Bar graph (right) shows population size for each cell type.

532 **Supplementary Figure 8. Inferring query surface protein expression in memory T cells. (a)** Mean  
533 Pearson correlation for CCA reference between k-NN predicted protein expression and ground truth for  
534 different values of *k*. **(b)** Symphony reference built from a standard mRNA PCA embedding (reference

535 protein values were not used to build embedding but treated as annotations only). Contour fill  
536 represents density of reference cells. Black points represent soft-cluster centroids in the Symphony  
537 mixture model. **(c)** We measured the accuracy of protein expression prediction based on the PCA  
538 reference with the Pearson correlation between predicted and ground truth expression for each surface  
539 protein across query cells in each donor. Bar height represents the average per-donor correlation for  
540 each protein, and error bars represent standard deviation. **(d)** Ground truth and predicted expression of  
541 CD4, CCR6, and CD69 based on PCA reference. Ground truth is the 50-NN-smoothed expression  
542 measured in the CITE-seq experiment. Colors are scaled independently for each marker from minimum  
543 (blue) to maximum (yellow) expression.

544

545 **Supplementary Table 1.** Links to datasets used in the study.

546 **Supplementary Table 2.** Canonical lineage markers (Wilcoxon rank sum test and auROC statistic) and  
547 top 10 differentially expressed genes per cluster used to assign cell types in 10x PBMCs.

548 **Supplementary Table 3.** Cell type classification confusion matrices for the three 10x PBMCs mapping  
549 experiments.

550 **Supplementary Table 4.** Runtime scalability analysis results (downsampling memory T cell dataset),  
551 showing effect of reference and query size, number of query cells or donors, and number of reference  
552 centroids or embedding dimensions on elapsed time (in secs).

553 **Supplementary Table 5.** Cell type classification confusion matrix for multi-donor, multi-species  
554 pancreatic islet cell benchmarking example (mapping Baron et al. 2016 as query) among the reference  
555 mapping methods evaluated.

556 **Supplementary Table 6.** Degree of mixing between reference and query cells (ref\_query LISI) and  
557 between donors within the query (query donor LISI) as well as runtime comparison across different  
558 reference mapping methods and corresponding *de novo* integration methods (Symphony/Harmony,  
559 Seurat v4/Seurat, and trVAE/scArches) for multi-donor, multi-species pancreas benchmarking example.

560 **Supplementary Table 7.** Cell type classification confusion matrix for mapping 10x 5'-sequenced fetal  
561 liver cells onto an atlas of 3'-sequenced fetal liver cells (Popescu et al. 2019). True labels provided by  
562 the original authors, and predictions were made using a 30-NN classifier.

## 563 Methods

### 564 **1. Symphony**

#### 565 1.1 Symphony overview

566 The goal of single-cell reference mapping is to embed newly assayed query cells into an existing  
567 comprehensive reference atlas, facilitating the automated transfer of annotations from the reference to  
568 the query. The optimal mapping method needs to be able to operate at various levels of resolution,  
569 capture continuous intermediate cell states, and scale to multimillion cells<sup>27</sup>. Consider a scenario in  
570 which we wish to map a query of  $m$  cells against reference datasets with  $n$  cells, where  $m \ll n$ .  
571 Unsupervised integration of measurements across donors, studies, and technological platforms is the  
572 standard way to compare single cell datasets and identify cell types. Hence, a “gold standard”  
573 reference mapping strategy might be to run Harmony integration on all  $m+n$  cells *de novo*. However,  
574 this approach is impractical because it is cumbersome and time-intensive to process all the cell-level  
575 data for the reference datasets every time a user wishes to reharmonize it with a query. Instead, we  
576 envision a pipeline where a reference atlas need only be carefully constructed and integrated once, and  
577 all subsequent queries can be rapidly mapped into the same stable reference embedding.

578 Symphony is a reference mapping method that efficiently places query cells in their precise location  
579 within an integrated low-dimensional embedding of reference cells, approximating *de novo*  
580 harmonization without the need to reintegrate the reference cells. Symphony is comprised of two  
581 algorithms: reference compression and mapping. Expanding upon the linear mixture model framework  
582 introduced in Harmony<sup>17</sup>, Symphony compression takes in an integrated reference and faithfully  
583 compresses it by capturing the components of the model into efficient data structures. The output of  
584 reference compression is the minimal set of elements needed for mapping (**Fig. S1b**). The Symphony  
585 mapping algorithm takes as input a new query dataset as well as minimal reference elements and  
586 returns the appropriate locations of the query cells within the integrated embedding (**Fig. S1c**).

587 Once a harmonized reference is constructed and compressed using Symphony, subsequent mapping  
588 of query cells executes within seconds (**Fig. 3**). Efficient implementations of Symphony are available as  
589 part of an R package at <https://github.com/immunogenomics/symphony>, along with several  
590 precomputed references constructed from public scRNA-seq datasets. The following sections introduce  
591 the Symphony model, then describes Symphony compression and mapping in terms of the underlying  
592 data structures and algorithms. We also provide **Supplementary Equations** containing more detailed  
593 derivations for reference compression terms.

## 594 *Glossary*

595 We define all symbols for data structures used in the discussion of Symphony below, including their  
596 dimensions and possible values. Dimensions are in terms of the following parameters:

- 597 •  $n$ : the number of reference cells
- 598 •  $m$ : the number of query cells
- 599 •  $N$ : the total number of cells ( $n + m$ )
- 600 •  $g$ : the number of genes in the reference after any gene selection
- 601 •  $d$ : the dimensionality of the embedding (e.g. PCs).  $d$  applies to both reference and query.
- 602 •  $b$ : the number of batches in the reference
- 603 •  $c$ : the number of batches in the query
- 604 •  $k$ : the number of clusters in the mixture model for reference integration (representing latent cell  
605 states)

## 606 **Reference-related symbols:**

|                                      |                                                                                                                                                                                                                                   |
|--------------------------------------|-----------------------------------------------------------------------------------------------------------------------------------------------------------------------------------------------------------------------------------|
| $G_r \in \mathbb{R}^{g \times n}$    | Input reference gene expression matrix, prior to scaling.                                                                                                                                                                         |
| $G_{rs} \in \mathbb{R}^{g \times n}$ | Scaled reference gene expression matrix.                                                                                                                                                                                          |
| $X_r \in \{0, 1\}^{b \times n}$      | One-hot design matrix assigning reference cells (columns) to batches (rows).                                                                                                                                                      |
| $X'_r \in \{0\}^{c \times n}$        | Zero matrix assigning reference cells (columns) to <i>query</i> batches (rows). All values are 0 because reference cells do not belong to query batches. This term is used in the derivation for the reference compression terms. |

|                                                |                                                                                                                                                            |
|------------------------------------------------|------------------------------------------------------------------------------------------------------------------------------------------------------------|
| $\mu \in \mathbb{R}^{g \times 1}$              | Reference gene means used to center each gene for PCA.                                                                                                     |
| $\sigma \in \mathbb{R}^{g \times 1}$           | Reference gene standard deviations used to scale each gene for PCA.                                                                                        |
| $U \in \mathbb{R}^{g \times d}$                | Gene loadings from the original PCA (before Harmony integration).                                                                                          |
| $Z_r \in \mathbb{R}^{d \times n}$              | Original (non-harmonized) PC embedding for reference cells.                                                                                                |
| $\hat{Z}_r \in \mathbb{R}^{d \times n}$        | Integrated embedding for reference cells in harmonized PC (hPC) space, as output by Harmony.                                                               |
| $R_r \in [0, 1]^{k \times n}$                  | Soft cluster assignment of reference cells (columns) to clusters (rows), as output by Harmony. Each column is a probability distribution that sums to 1.   |
| $Y_{cos} \in \mathbb{R}^{d \times k}$          | Cluster centroid locations in the harmonized embedding, L2 normalized.                                                                                     |
| $B_r \in \mathbb{R}^{k \times (1+b) \times d}$ | 3D tensor of the estimated parameters (betas and intercepts) of the linear mixture model for each of $k$ clusters for the reference cells.                 |
| $N_r \in \mathbb{R}^{k \times 1}$              | First reference compression term. Vector containing the size of each of the $k$ clusters, effectively the number of reference cells contained within them. |
| $C \in \mathbb{R}^{k \times d}$                | Second reference compression term.                                                                                                                         |
| $Ref = \{\mu, \sigma, U, Y_{cos}, N_r, C\}$    | Symphony minimal reference elements comprising $\mu, \sigma, U, Y_{cos}, N_r, C$ .                                                                         |

607 **Query-related symbols:**

|                                                |                                                                                                                                |
|------------------------------------------------|--------------------------------------------------------------------------------------------------------------------------------|
| $G_q \in \mathbb{R}^{g \times m}$              | Input query gene expression matrix, prior to scaling.                                                                          |
| $G_{qs} \in \mathbb{R}^{g \times m}$           | Query gene expression matrix, scaled by <i>reference</i> gene means $\mu$ and standard deviations $\sigma$ .                   |
| $X_q \in \{0, 1\}^{c \times m}$                | Design matrix assigning query cells (columns) to query batches (rows).                                                         |
| $Z_q \in \mathbb{R}^{d \times m}$              | Query cell locations in original (non-harmonized) PC embedding.                                                                |
| $\hat{Z}_q \in \mathbb{R}^{d \times m}$        | Approximate query cell locations in integrated embedding (hPC space). Output of Symphony reference mapping.                    |
| $R_q \in [0, 1]^{k \times m}$                  | Soft cluster assignment of query cells (columns) to clusters (rows). Each column is a probability distribution that sums to 1. |
| $B_q \in \mathbb{R}^{k \times (1+c) \times d}$ | 3D tensor of the estimated parameters (betas and intercepts) of the linear mixture model for each of $k$ clusters.             |

608 **1.2 Symphony model and conditions for equivalence to Harmony integration**



609 Symphony and Harmony both use a linear mixture model framework, but the two methods perform  
610 different tasks: Harmony integrates a reference, whereas Symphony compresses the reference and  
611 enables efficient query mapping. To motivate the Symphony model, it is helpful to first briefly review the  
612 mixture model, which serves as the basis. Harmony integrates scRNA-seq datasets across batches  
613 (e.g. multiple donors, technologies, studies) and projects the cells into a harmonized embedding where  
614 cells cluster by cell type rather than batch-specific effects. Harmony takes as input a low-dimensional  
615 embedding of cells ( $Z$ ) and design matrix with assignments to batches ( $X$ ) and outputs a harmonized  
616 embedding ( $\hat{Z}$ ) with batch effects removed. Briefly, Harmony works by iterating between two  
617 subroutines—maximum diversity clustering and linear mixture model correction—until convergence. In  
618 the clustering step, cells are probabilistically assigned to soft clusters with a variant of soft  $k$ -means with  
619 a diversity penalty favoring clusters represented by multiple datasets rather than single datasets. In the  
620 correction step, each cluster learns a cluster-specific linear model that explains cell locations in PC  
621 space as a function of a cluster-specific intercept and batch membership. Then, cells are corrected by  
622 cell-specific linear factors weighted by cluster membership to remove batch-dependent effects. The full  
623 algorithm and implementation are detailed in Korsunsky et al. (2019)<sup>17</sup>.

624 In the scenario of mapping  $m$  query cells against  $n$  reference cells, the *de novo* integration strategy  
625 would model all cells as in (1), where the  $H$  subscript denotes the Harmony solution, in contrast to the  
626 Symphony model which is presented in (2). Let  $X_H \in \{0,1\}^{(c+b) \times (m+n)}$  represent the one-hot encoded  
627 design matrix assigning all cells across batches.  $X_H^*$  denotes  $X_H$  augmented with a row of 1s for the  
628 batch-independent intercept term:  $X_H^* = 1 || X_H$ . The intercept terms represent cluster centroids (location  
629 of “experts” in the mixture of experts model).  $Z_H$  represents the low-dimensional PCA embedding of all  
630 cells.  $R_H$  represents the probabilistic assignment of cells across  $k$  clusters, and  $diag(R_{Hk}) \in \mathbb{R}^{N \times N}$   
631 denotes the diagonalized  $k$ th row of  $R_H$ . For each cluster  $k$ , the parameters of the linear mixture model  
632  $B_k \in \mathbb{R}^{(1+c+b) \times d}$  can therefore be solved for as in (1), using ridge regression with ridge penalty  
633 hyperparameter  $\lambda$ . Note that we do not penalize the batch-independent intercept term:  $\lambda_0 = 0$ ,  
634  $\forall_{a \in [1:(c+b)]} \lambda_a = 1$ .

635 **De novo Harmony model:**

$$B_k = (X_H^* \text{diag}(R_{Hk}) X_H^{*T} + \lambda I)^{-1} X_H^* \text{diag}(R_{Hk}) Z_H^T \quad (1)$$

636 The goal of Symphony mapping is to add new query cells to the model in order to estimate and remove  
637 the query batch effects. Symphony mapping approximates *de novo* Harmony integration on all cells,  
638 except the reference cell positions in the harmonized embedding do not change. In order for Symphony  
639 mapping to be equivalent to *de novo* Harmony, several conditions must be met:

- 640 I. All cell states represented in the query dataset are captured by the reference datasets—i.e.  
641 there are no completely novel cell types in the query.
- 642 II. The number of reference cells is much larger than the query ( $m \ll n$ ).
- 643 III. The query dataset is obtained independent of the reference datasets—i.e. the reference  
644 batch design matrix ( $X_r$ ) has no interaction with the query batch design matrix ( $X_q$ ).

645 We consider these to be fair assumptions for large-scale reference atlases, allowing Symphony to  
646 make three key approximations:

- 647 (1) With a large reference, the reference-only PCs approximate the PCs for the combined reference  
648 and query datasets. This allows us to project the query cells into the pre-harmonized reference  
649 PCA space using the reference gene loadings ( $U$ ).
- 650 (2) The cluster centroids ( $Y$ ) for the integrated reference cells approximate the cluster centroids  
651 from harmonizing all cells.
- 652 (3) The reference cell cluster assignments ( $R_r$ ) remains approximately stable with the addition of  
653 query cells.

654 Given these approximations, we can thereby harmonize the reference cells *a priori* and save the  
655 reference-dependent portions of the Harmony mixture model (**Supplementary Equations**). In  
656 Symphony, we model the reference cells as already harmonized with batch effects removed, so we can  
657 thereafter ignore the reference design matrix structure. The Symphony design matrix  $X \in [0, 1]^{C \times N}$   
658 assigns all cells (reference and query) to *query* batches only.  $X^*$  denotes  $X$  augmented with a row of 1s

659  $(X_{[0, \cdot]}^*)$  corresponding to the batch-independent intercepts (we model the intercepts for all cells). The  
660 remaining  $c$  rows  $(X_{[1:c, \cdot]}^*)$  represent the one-hot batch assignment of the cells among the  $c$  query  
661 batches. Note that for the reference cell columns, these values are all 0 since the reference cells do not  
662 belong to any *query* batches. The parameters  $(B_{qk} \in \mathbb{R}^{(1+c) \times d})$  of the model for each cluster  $k$  can  
663 then be solved for as in (2). Similar to Harmony, we use ridge regression penalizing the non-intercept  
664 terms, where  $\lambda_0 = 0, \forall_{a \in [1:c]} \lambda_a = 1$ .

665 **Symphony model:**

$$B_{qk} \approx (X^* \text{diag}(R_k) X^{*T} + \lambda I)^{-1} X^* \text{diag}(R_k) Z^T \quad (2)$$

666 The matrix  $R \in \mathbb{R}^{k \times N}$  denotes the assignment of query and reference cells (columns) across the  
667 reference clusters (rows).  $Z \in \mathbb{R}^{d \times N}$  denotes the horizontal matrix concatenation of the uncorrected  
668 query cells in original PC space ( $Z_q$ ) and corrected reference cells in harmonized space ( $\hat{Z}_r$ ). For each  
669 cluster  $k$ , let matrix  $B_{qk} \in \mathbb{R}^{(1+c) \times d}$  represent the query parameters to be estimated. The first row of  
670  $B_{qk}$  represents the batch-independent intercept terms, and the remaining  $c$  rows of  $B_{qk}$  represent the  
671 query batch-dependent coefficients, which can be regressed out to harmonize the query cells with the  
672 reference. Note that the intercept terms from Symphony mapping should equal the cluster centroid  
673 locations from the integrated reference since the harmonized reference cells are modeled only by a  
674 weighted average of the centroid locations for the clusters over which it belongs (and a cell-specific  
675 residual). Hence, the reference cell positions should not change when removing query batch effects.

676 The matrices  $X^*$ ,  $R_k$ , and  $Z$  in (2) can be partitioned into query and reference-dependent portions. In the  
677 **Supplementary Equations**, we show in detail how the reference-dependent portions can be further  
678 simplified into a  $k \times 1$  vector and  $k \times d$  matrix ( $N_r$  and  $C$ ), which we call “reference compression terms.”  
679 Intuitively, the vector  $N_r$  contains the size (in cells) of each reference cluster. The matrix  $C = R_r \hat{Z}_r^T$  does  
680 not have as intuitive an explanation but follows from the derivation (**Supplementary Equations**). These  
681 terms can be computed at the time of reference building and saved as part of the minimal reference  
682 elements to reduce the necessary computations during mapping.

### 683 1.3 Reference building and compression

684 Reference compression is the key idea that allows for the efficient mapping of new query cells onto the  
685 harmonized reference embedding without the need to reintegrate all cells. To construct a Symphony  
686 reference with minimal elements needed for mapping, reference cells are first harmonized in a low-  
687 dimensional space (e.g. PCs) to remove batch-dependent effects. Symphony then compresses the  
688 Harmony mixture model components to be saved for subsequent query mapping.

#### 689 **Data structures**

690 Symphony takes as input a gene expression matrix for reference cells ( $G_r$ ) and corresponding one-hot-  
691 encoded design matrix ( $X_r$ ) containing metadata about assignment of cells to batches. It outputs a set  
692 of data structures, referred to as the Symphony minimal reference elements, that captures key  
693 information about the reference embedding that can be subsequently used to efficiently map previously  
694 unseen query cells (**Algorithm 1**). These components include the gene mean ( $\mu$ ) and standard  
695 deviation ( $\sigma$ ) used to scale the genes, the PCA gene loadings ( $U$ ), the final L2-normalized cluster  
696 centroid locations ( $Y_{cos}$ ), and precomputed values which we call the “reference compression terms” ( $N_r$   
697 and  $C$ ) that expedite the correction step of query mapping (**Supplementary Equations**). These  
698 elements are a subset of the components available once Harmony integration is applied to the  
699 reference cells. Note that other input embeddings, such as canonical correlation analysis (CCA), may  
700 be used in place of PCA as long as the gene loadings to perform query projection into those  
701 coordinates are saved.

702 **Table 1** lists the Symphony minimal reference elements required to perform mapping. **Table 2** shows  
703 additional components of a “full” Harmony reference that are not included in the Symphony reference  
704 elements. Importantly, the dimensions of the Symphony data structures do not require information on  
705 the  $n$  individual reference cells and hence do not scale with the raw number of reference cells. Rather  
706 the components scale with the biological complexity captured (i.e. number of clusters  $k$  and  
707 dimensionality of embedding  $d$ ). Conversely, the Harmony data structures store information on a per-  
708 cell basis ( $n$ ). Note that in practice the integrated embedding of reference cells ( $\hat{Z}_r$ ) listed in **Table 2** is

709 needed to perform downstream transfer of annotations from reference to query cells (e.g. k-NN), but it  
 710 is not required during any computations of the mapping step.

711 **Table 1: Symphony minimal reference elements**

|                                       |                                                                                                                                                            |
|---------------------------------------|------------------------------------------------------------------------------------------------------------------------------------------------------------|
| $\mu \in \mathbb{R}^{g \times 1}$     | Reference gene means used to center each gene for PCA.                                                                                                     |
| $\sigma \in \mathbb{R}^{g \times 1}$  | Reference gene standard deviations used to scale each gene for PCA.                                                                                        |
| $U \in \mathbb{R}^{g \times d}$       | Gene loadings to project from expression to PCA (or CCA) space                                                                                             |
| $Y_{cos} \in \mathbb{R}^{d \times k}$ | Cluster centroid locations in harmonized PC space, L2 normalized.                                                                                          |
| $N_r \in \mathbb{R}^{k \times 1}$     | First reference compression term. Vector containing the size of each of the $k$ clusters, effectively the number of reference cells contained within them. |
| $C \in \mathbb{R}^{k \times d}$       | Second reference compression term.                                                                                                                         |

712

713 **Table 2: Additional components of Harmony reference**

|                                                |                                                                                                                                                          |
|------------------------------------------------|----------------------------------------------------------------------------------------------------------------------------------------------------------|
| $G_r \in \mathbb{R}^{g \times n}$              | Input reference gene expression matrix, prior to scaling.                                                                                                |
| $X_r \in \{0, 1\}^{b \times n}$                | Design matrix assigning reference cells (columns) to reference batches (rows).                                                                           |
| $B_r \in \mathbb{R}^{k \times (1+b) \times d}$ | 3D tensor of the estimated parameters (betas and intercepts) of the linear mixture model for each of $k$ clusters for the reference cells.               |
| $\hat{Z}_r \in \mathbb{R}^{d \times n}$        | Integrated embedding for reference cells in harmonized PC (“hPC”) space, as output by Harmony.                                                           |
| $R_r \in [0, 1]^{k \times n}$                  | Soft cluster assignment of reference cells (columns) to clusters (rows), as output by Harmony. Each column is a probability distribution that sums to 1. |

714

## 715 **Algorithm**

716 Starting from reference cell gene expression, we first perform within-cell library size normalization (if not  
 717 already done) and variable gene selection to obtain  $G_r$ , scaling of the genes to have mean 0 and  
 718 variance 1 (saving  $\mu$  and  $\sigma$  for each gene), and PCA to embed the reference cells in a low-dimensional  
 719 space, saving the gene loadings ( $U$ ) (**Implementation Details**). Then, the PCA embedding ( $Z_r$ ) and  
 720 batch design matrix ( $X_r$ ) are used as input to Harmony integration to harmonize over batch-dependent  
 721 sources of variation. Given the resulting harmonized embedding ( $\hat{Z}_r$ ) and final soft assignment of

722 reference cells to clusters ( $R_r$ ), the locations of the final reference cluster centroids  $Y \in \mathbb{R}^{d \times k}$  can be  
 723 calculated as in (3) and saved.

$$Y = \hat{Z}_r R_r^T \quad (3)$$

724 Symphony then computes the reference compression terms  $N_r$  (intuitively, the number of cells per  
 725 cluster) and  $C$ , which does not have an intuitive explanation but can be directly computed as  $C = R_r \hat{Z}_r^T$ .  
 726 Refer to the **Supplementary Equations** for a complete mathematical derivation of the compression  
 727 terms. Symphony reference building ultimately returns the minimal reference elements:  $\mu, \sigma, U, Y_{cos}, N_r,$   
 728 and  $C$  (**Fig. S1a**).

---

729 **Algorithm 1** Build Symphony reference

---

```

730 function BUILDREFERENCE( $G_r, X_r$ )
731      $\mu, \sigma, G_{rs} \leftarrow$  SCALE( $G_r$ )
732      $U, Z_r \leftarrow$  PCA( $G_{rs}$ )
733      $\hat{Z}_r, R_r \leftarrow$  HARMONIZE( $Z_r, X_r$ )
734      $Y \leftarrow \hat{Z}_r R_r^T$ 
735      $Y_{cos} \leftarrow Y_{[:,i]} / \|Y_{[:,i]}\|_2$   $\triangleright L_2$  normalize cluster centroids
736      $N_r \leftarrow$  rowSums( $R_r$ )  $\triangleright$  First compression term
737      $C \leftarrow R_r \hat{Z}_r^T$   $\triangleright$  Second compression term
738      $Ref \leftarrow (\mu, \sigma, U, Y_{cos}, N_r, C)$ 
739     return  $Ref$   $\triangleright$  Return minimal reference elements
    
```

---

740

## 741 1.4 Symphony mapping

742 The Symphony mapping algorithm localizes new query cells to their appropriate locations in the  
 743 harmonized embedding without the need to run integration on the reference and query cells altogether.  
 744 The joint embedding of reference and query cells can be used for downstream analyses, such as  
 745 transferring cell type annotations from the reference cells to the query cells.

746 **Data structures**

747 Symphony mapping takes as input the gene expression matrix for query cells ( $G_q$ ), query design matrix  
 748 assigning query cells to batches ( $X_q$ ), and the precomputed minimal elements for a reference ( $Ref$ ). It  
 749 outputs a query object containing the locations of query cells in the integrated reference embedding  
 750 ( $\hat{Z}_q$ ; **Algorithm 2**). **Table 3** lists the components of the query object that is returned by Symphony.

751 **Table 3: Components of Symphony query**

|                                                |                                                                                                                                |
|------------------------------------------------|--------------------------------------------------------------------------------------------------------------------------------|
| $G_q \in \mathbb{R}^{g \times m}$              | Input query gene expression matrix, prior to scaling.                                                                          |
| $X_q \in \{0, 1\}^{c \times m}$                | Design matrix assigning query cells (columns) to query batches (rows).                                                         |
| $Z_q \in \mathbb{R}^{d \times m}$              | Query cell locations in original (non-harmonized) PC embedding.                                                                |
| $\hat{Z}_q \in \mathbb{R}^{d \times m}$        | Approximate query cell locations in integrated embedding (hPC space).                                                          |
| $R_q \in [0, 1]^{k \times m}$                  | Soft cluster assignment of query cells (columns) to clusters (rows). Each column is a probability distribution that sums to 1. |
| $B_q \in \mathbb{R}^{k \times (1+c) \times d}$ | 3D tensor of the estimated parameters (betas and intercepts) of the linear mixture model for each of $k$ clusters.             |

752

753 **Algorithm**

754 The input to the query mapping procedure is a gene expression matrix ( $G_q$ ) and design matrix ( $X_q$ ) for  
 755 query cells, and the output is the locations of the cells in the harmonized embedding ( $\hat{Z}_q$ ). At a high  
 756 level, the mapping algorithm first projects the query cells into the original, non-harmonized PC space as  
 757 the reference cells using the reference gene loadings ( $U$ ) and assigns probabilistic cluster membership  
 758 across the reference cluster centroid locations. Then, the query cells are modeled using the Symphony  
 759 mixture model and corrected to their approximate locations in the integrated embedding by regressing  
 760 out the query batch-dependent effects (**Algorithm 2**).

761 **Projection of query cells into pre-harmonized PC Space**

762 Symphony projects the query cells into the same original PCs ( $Z_r$ ) as the reference. Symphony  
 763 assumes that, given a much smaller query compared to the reference ( $m \ll n$ ), the PCs will remain

764 approximately stable with the addition of query cells. To project the query cells, we first subset the  
765 query expression data by the same variable genes used in reference building and scale the normalized  
766 expression of each gene by the same mean and standard deviations used to scale the reference cells  
767  $(\mu, \sigma)$ . Let  $G_{qs}$  denote the query gene expression matrix scaled by the reference gene means and  
768 standard deviations. We can then use the reference gene loadings ( $U$ ) to project  $G_{qs}$  into reference PC  
769 space. In (4),  $Z_q \in \mathbb{R}^{d \times m}$  denotes the PC embedding for the query cells. Note that if an alternate  
770 starting embedding (e.g. CCA) is used instead of PCA, the gene loadings must be saved to enable this  
771 query projection step.

$$Z_q = U^T G_{qs} = \Sigma_q V_q^T \quad (4)$$

### 772 **Soft assignment across reference clusters**

773 Once the query cells are projected into PC space, we soft assign the cells to the reference clusters  
774 using the saved reference centroid locations ( $Y_{cos}$ ). Symphony assumes that the reference cluster  
775 centroid locations remain approximately stable with the addition of a much smaller query dataset since  
776 the query contains no novel cell types. Under these conditions, we use a previously published objective  
777 function for soft  $k$ -means clustering (5), which includes a distance term and an entropy regularization  
778 term over  $R$  weighted by hyperparameter  $\sigma$ . This is the same objective function as the clustering step of  
779 Harmony, except it does not include the diversity penalty term. In Harmony, the purpose of the diversity  
780 term is to penalize clusters that are only represented by one or a few datasets (suggesting they do not  
781 represent true cell types). In contrast, Symphony does not require the use of a diversity penalty  
782 because the reference centroids have already been established. Furthermore, the query cell types can  
783 comprise a subset of a larger set of reference cell types, and therefore not all clusters are necessarily  
784 expected to be represented in the query. We can solve for  $R_q$ , the optimal probabilistic assignment for  
785 query cells across each of the  $k$  reference clusters (**Implementation Details**).

$$\min_{R,Y} \sum_{i,k} R_{ki} \|Z_i - Y_k\|^2 + \sigma R_{ki} \log R_{ki} \quad (5)$$



$$\text{s.t. } \forall_i \forall_k R_{ki} > 0, \forall_i \sum_{k=1}^K R_{ki} = 1$$

786 **Mixture of experts correction**

787 The final step in Symphony mapping is to model then remove the query batch effects to obtain  $\hat{Z}_q$ , the  
 788 approximate location of query cells in the harmonized reference embedding. In equation (2), we  
 789 modeled the reference and query cells together and wish to solve for the query parameters  $B_{qk} \in$   
 790  $\mathbb{R}^{(1+c) \times d}$  for each cluster  $k$ . The reference-dependent terms in (2) were previously computed and  
 791 saved in compressed form ( $N_r$  and  $C$ ). With  $R_q$  and  $Z_q$  calculated from query cell projection and  
 792 clustering, we can finally solve for  $B_{qk}$ . Similar to the correction step of Harmony, we obtain cell-specific  
 793 correction values for the query cells by removing the batch-dependent terms captured in  $B_{qk[1:c,\cdot]}$ . Note  
 794 that the reference batch terms are neither modeled nor corrected during reference mapping, so the  
 795 harmonized reference cells do not move.

796 The final locations of the query cells in the harmonized embedding are estimated by iterating over all  $k$   
 797 clusters and subtracting out the non-intercept batch terms for each cell weighted by cluster membership  
 798 (6). Intuitively, the query centroids are moved so that they overlap perfectly with the reference centroids  
 799 in the harmonized embedding.  $\hat{Z}_{q[i]}$  denotes the approximate location in harmonized PC space for  
 800 query cell  $i$ .

$$Z_{q[i]} = \sum_k R_{q[k,i]} [B_{qk[0,\cdot]}^T + B_{qk[1:c,i]}^T X_q] + \varepsilon$$

$$\hat{Z}_{q[i]} = Z_{q[i]} - \sum_k R_{q[k,i]} B_{qk[1:c,\cdot]}^T X_q \quad (6)$$

$$\hat{Z}_{q[i]} = \sum_k R_{q[k,i]} B_{qk[0,\cdot]}^T + \varepsilon$$

---

801 **Algorithm 2** Map query cells onto reference

---

802 **function** QUERYMAPPING( $G_q, X_q, Ref$ )

803  $G_{qs} \leftarrow \mathbf{SCALE}(G_q, Ref\$ \mu, Ref\$ \sigma) \quad \triangleright \$ \text{ denotes accessing a component of } Ref$

```
804  $Z_q \leftarrow \text{PCAPROJECTION}(G_{qs}, \text{Ref}\$U)$ 
805  $R_q \leftarrow \text{CLUSTER}(Z_q, \text{Ref}\$Y_{cos})$ 
806  $\hat{Z}_q \leftarrow Z_q$ 
807 for  $k \leftarrow 1 \dots k$  do
808    $E \leftarrow X_q^* R_q^{(k)} X_q^{*T}$   $\triangleright X_q^*$ : query design matrix augmented with row of 1s
809    $E_{[0,0]} \leftarrow E_{[0,0]} + \text{Ref}\$N_{r(k)}$ 
810    $F \leftarrow X_q^* R_q^{(k)} Z_q^T$ 
811    $F_{[0,\cdot]} \leftarrow F_{[0,\cdot]} + \text{Ref}\$C_{[k,\cdot]}$ 
812    $B_{qk} \leftarrow (E + \lambda I)^{-1}(F)$ 
813    $B_{qk[0,\cdot]} \leftarrow 0$   $\triangleright$  Do not correct the intercept terms
814    $\hat{Z}_q \leftarrow \hat{Z}_q - B_{qk}^T X_q^* R_q^{(k)}$ 
815 return  $\hat{Z}_q$   $\triangleright$  Return query locations
```

---

816

## 817 1.5 Implementation details

### 818 Reference building and compression

#### 819 *Variable gene selection and scaling*

820 Starting with the gene expression matrix for reference cells, we perform log(CP10K) library size  
821 normalization of the cells (if not already done), subset by the top  $g$  variable genes by the vst method  
822 (as provided in Seurat<sup>18</sup>), which fits a line to the log(variance) and log(mean) relationship using local  
823 polynomial regression, then standardizes the features by observed mean and expected variance,  
824 calculating gene variance on the standardized values, which is re-implemented as a standalone  
825 function at <https://github.com/immunogenomics/singlecellmethods>. The data is scaled such that the  
826 expression of each gene has a mean expression of 0 and variance of 1 across all cells.

#### 827 **PCA**

828 We perform dimensionality reduction on the scaled gene expression  $G_{rs}$  using principal component  
829 analysis (PCA). PCA projects the data a low-dimensional, orthonormal embedding that retains most of

830 the variation of gene expression in the dataset. Singular value decomposition (SVD) is a matrix  
831 factorization method that can calculate the PCs for a dataset. Here, we use SVD (irlba package in R<sup>53</sup>)  
832 to perform PCA. SVD states that matrix  $G_{rs}$  with dimensions  $g \times n$  can be factorized as:

$$G_{rs} = U\Sigma V^T \quad (7)$$

833 In (7),  $\Sigma V^T = Z_r$  (dimensions  $d \times n$ ) represents the embedding of reference cells in PC space, after  
834 truncating the matrix on the first  $d$  (by default,  $d = 20$ ) PCs. The gene loadings ( $U \in \mathbb{R}^{g \times d}$ ) are saved.  
835 Note that an alternative embedding, such as canonical correlation analysis (CCA) may be used in place  
836 of PCA, as long as the gene loadings are saved.

### 837 ***Harmony integration***

838 The PCA embedding ( $Z_r$ ) is then input to Harmony for dataset integration. By default, Symphony uses  
839 the default parameters for the cluster diversity enforcement ( $\theta = 2$ ), the entropy regularization  
840 hyperparameter for soft  $k$ -means ( $\sigma = 0.1$ ), and the number of clusters  $k = \min\left(100, \frac{n}{30}\right)$ . We save the  
841 L2-normalized cluster centroid locations  $Y_{cos}$  to the reference object since query mapping employs a  
842 cosine distance metric. If the reference has a single-level batch structure, no integration is performed,  
843 and the clusters are defined using soft  $k$ -means.

### 844 **Query mapping**

#### 845 ***Normalization and scaling***

846 The gene expression for query cells are assumed to be library size normalized in the same manner that  
847 was used to normalize the reference cells (e.g. log(CP10K)). During scaling, the query data is subset  
848 by the same variable genes from the reference datasets, and query gene expression is scaled by the  
849 *reference* gene means and standard deviations. Any genes present in the query but not the reference  
850 are ignored, and any genes present in the reference but not the query have scaled expression set to 0.

#### 851 ***Clustering step uses cosine distance***

852 As in Harmony, in practice we use cosine distance rather than Euclidean distance in the clustering step.  
 853 For the computation of the distance term, we L2-normalize the columns (cells) of  $Z$  and columns  
 854 (centroids) of  $Y_k$  such that the squared values sum to 1 across each column. Let the terms  $Z_{q\_cos[\cdot,i]}$  and  
 855  $Y_{cos[\cdot,k]}$  represent the L2-normalized locations of query cell  $i$  and the reference centroid for cluster  $k$  in  
 856 PC space, respectively. We compute the cosine distance between the cells and centroids. Since all  
 857  $Z_{q\_cos[\cdot,i]}$  and  $Y_{cos[\cdot,k]}$  each have unity norm, the squared Euclidean distance  $\|Z_{q\_cos[\cdot,i]} - Y_{cos[\cdot,k]}\|^2$  is  
 858 equivalent to the cosine distance  $2(1 - \cos(Y_{cos[\cdot,k]}, Z_{q\_cos[\cdot,i]})) = 2(1 - Y_{cos[\cdot,k]}^T Z_{q\_cos[\cdot,i]})$ . Therefore, the  
 859 objective function for query assignment to centroids becomes:

$$\min_{R,Y} \sum_{i,k} 2R_{q[k,i]}(1 - Y_{cos[k,\cdot]}^T Z_{q\_cos[\cdot,i]}) + \sigma R_{q[k,i]} \log R_{q[k,i]} \quad (8)$$

$$\text{s.t. } \forall_i \forall_k R_{q[k,i]} > 0, \forall_i \sum_{k=1}^K R_{q[k,i]} = 1$$

860 We can solve the optimization problem using an expectation-maximization framework. Following the  
 861 same strategy as Korsunsky et al. (2019), we calculate  $R_i$ , the optimal probabilistic assignment for each  
 862 query cell  $i$  across each of the  $k$  reference clusters. In (9), we can interpret  $R_{q[k,i]}$  as the probability that  
 863 query cell  $i$  belongs to cluster  $k$ . The denominator term simply ensures that for any given cell  $i$ , the  
 864 probabilities across all  $k$  clusters sum to one. By default, sigma=0.1

$$R_{q(k,i)} = \frac{\exp\left(-\frac{2}{\sigma}(1 - Y_{cos[k,\cdot]}^T Z_{q\_cos[\cdot,i]})\right)}{\sum_{k=1}^K \exp\left(-\frac{2}{\sigma}(1 - Y_{cos[k,\cdot]}^T Z_{q\_cos[\cdot,i]})\right)} \quad (9)$$

## 865 2. Analysis details

### 866 2.1 10x PBMCs analysis

#### 867 *Preprocessing scRNA-seq data*

868 The three 10x PBMCs datasets were previously preprocessed by our group as part of the Harmony  
869 publication. We used the same  $\log(1+CP10K)$  normalized expression data, filtered as described in  
870 Korsunsky et al. (2019)<sup>17</sup>. The PBMCs consist of cells from three technologies: 3'v1 (n=4,808 cells),  
871 3'v2 (8,372 cells), and 5' (7,612 cells).

### 872 ***Symphony mapping experiments***

873 To construct each of three references for subsequent mapping, we aggregated two reference datasets  
874 into a single normalized expression matrix and identified the top 2,000 variable genes across all cells  
875 using the variance stabilizing transformation (VST) procedure<sup>18</sup>. We ran Harmony on the top 20 PCs  
876 and default 100 clusters, harmonizing over 'technology' with default parameters. For Symphony  
877 mapping, we specified query 'technology' covariate.

### 878 ***Constructing gold standard embedding***

879 To construct the gold standard *de novo* Harmony embedding, we concatenated all three datasets  
880 together into a single expression matrix, subsetted by the top 2,000 variable genes over all cells, and  
881 ran Harmony integration on the top 20 PCs, harmonizing over 'technology' with default parameters.

### 882 ***Assigning ground truth cell types***

883 We clustered the cells in the gold standard embedding using the Louvain algorithm as implemented in  
884 the Seurat functions *BuildSNN* and *RunModularityClustering*<sup>18</sup>. For PBMCs, we used `nn_k = 5` (to  
885 capture rare HSCs), `nn_eps = 0.5`, and `resolution = 0.8`. We labeled clusters with ground truth cell types  
886 according to expression of canonical lineage marker genes (**Table S2**). PBMCs were assigned across  
887 7 types: T (*CD3D*), NK (*GNLY*), B (*MS4A1*), Monocytes (*CD14*, *FCGR3A*), DCs (*FCER1A*),  
888 Megakaryocytes (*PPBP*), and HSCs (*CD34*). Clusters were labeled if the AUC (calculated using  
889 *presto*<sup>54</sup>) for the corresponding lineage marker was  $>0.62$ . For clusters that did not express a specific  
890 lineage marker, we manually assigned a cell type based on the top differentially expressed genes  
891 (**Table S2**). PBMCs cluster 20 was identified as low-quality cells (high in mitochondrial genes; **Table**

892 **S2**). We removed all cells in this cluster (n=94) from further analyses. The final ground truth labels were  
893 used in downstream analyses and cell type classification accuracy evaluation.

#### 894 ***Evaluation of mixing and cell type classification accuracy***

895 To compare dataset mixing between *de novo* integration and mapping, we calculated Local Inverse  
896 Simpson Index (LISI) using the *compute\_lisi* function from <https://github.com/immunogenomics/LISI>.  
897 For each mapping experiment, we calculated dataset LISI on all cells, then subsetted the results for  
898 query cell neighborhoods only to measure the effective number of datasets in the local neighborhood of  
899 each query cell.

900 We predicted query cell types by transferring reference cell type annotations using the *knn* function in  
901 the 'class' R package (k=5). We calculated overall accuracy across all query cells and cell type F1  
902 scores (the harmonic mean of precision and recall, ranging from 0 to 1). Precision = TP/(TP+FP), recall  
903 = TP/(TP+FN), F1 = (2 \* precision \* recall) / (precision + recall). Cell type F1 was the metric Abdelaal et  
904 al. used to benchmark automated cell type classifiers<sup>35</sup>. We used their *evaluate.R* script to calculate  
905 confusion matrices and F1 scores by cell type.

#### 906 ***Quantifying local similarity between two embeddings***

907 k-NN-correlation (k-NN-corr) is a new metric that quantifies how well a given alternative embedding  
908 preserves the local neighborhood structure with respect to a gold standard embedding. Anchoring on  
909 each query cell, we calculate (1) the pairwise similarities to its *k* nearest reference neighbors in the gold  
910 standard embedding and (2) the similarities between the same query-reference neighbor pairs in an  
911 alternate embedding (**Methods**), then calculate the Spearman (rank-based) correlation between (1)  
912 and (2). For similarity, we use the radial basis function kernel:  $similarity(x,y) = \exp(-\|x-y\|^2/(2\sigma^2))$ . For  
913 each query cell, we obtain a single k-NN-corr value capturing how well the relative similarities to its *k*  
914 nearest reference neighbors are preserved. Note that k-NN-corr is asymmetric with respect to which  
915 embedding is selected as the gold standard and which is selected as the alternative because the  
916 nearest neighbor pairs are fixed based on how they were defined in the gold standard. The distribution

917 of k-NN-corr scores for all query cells can measure the embedding quality, where higher k-NN-corr  
918 indicates greater recapitulation of the gold standard. Lower values for  $k$  assess more local  
919 neighborhoods, whereas higher  $k$  assesses more global structure.

920 We calculated k-NN-corr between the gold standard Harmony embedding and two alternative  
921 embeddings: (1) the full Symphony mapping algorithm (projection, clustering, and correction) and (2)  
922 PCA-projection only as a comparison to a batch-naïve mapping. PCA-projection refers to the first step  
923 of Symphony mapping, where query cells are projected from gene expression to pre-harmonized PC  
924 space:  $Z_q = U^T G_q$ .

## 925 2.2 Benchmarking against automatic cell type classifiers

926 We downloaded the Pbmcbench benchmarking dataset used by a recent comparison of automatic cell  
927 type identification methods<sup>35,39</sup>. For each of 48 train-test experiments previously described<sup>35</sup>, we used  
928 the same evaluation metrics (median cell type F1 score) to evaluate Symphony in comparison to the 22  
929 other classifiers. We obtained the numerical F1-score results for the other classifiers for all 48  
930 experiments directly from the authors in order to determine Symphony's place within the rank ordering  
931 of classifier performance.

932 During reference building, we explored two different gene selection methods: (1) unsupervised (top  
933 2000 variable genes) and (2) supervised based on identifying the top 20 differentially expressed (DE)  
934 genes per cell type. Option (2) was included to give Symphony the same information as prior-  
935 knowledge classifiers (e.g. SCINA with 20 marker genes per cell type). We used the 'presto' package<sup>54</sup>  
936 for DE analysis. No integration was performed because the reference had a single-level batch structure  
937 (clusters were simply assigned using soft k-means). Onto each of 7 references (each representing 1  
938 protocol for donor pbmc1), we mapped either a second protocol for donor pbmc1 (6 experiments) or the  
939 same protocol for donor pbmc2 (1 experiment). Given the resulting Symphony joint feature  
940 embeddings, we used three downstream classifiers to predict query cell types: 5-NN, SVM with a radial  
941 kernel, and glm\_net with ridge<sup>55</sup>. A total of 6 Symphony-based classifiers were tested (2 gene selection  
942 methods \* 3 downstream classifiers).



## 943 2.2 Pancreas benchmark

### 944 ***Constructing the pancreas query with mouse and human***

945 The pancreas query dataset (Baron et al., 2016; inDrop, n=8,569 human and 1,886 mouse cells) along  
946 with author-defined cell type labels were downloaded from [https://hemberg-](https://hemberg-lab.github.io/scRNA.seq.datasets/human/pancreas/)  
947 [lab.github.io/scRNA.seq.datasets/human/pancreas/](https://hemberg-lab.github.io/scRNA.seq.datasets/human/pancreas/). In order to combine the human and mouse  
948 matrices into a single aggregated query, we “humanized” the mouse expression matrix by mapping  
949 mouse genes to their orthologous human genes. This mapping was computed using the biomaRt R  
950 package<sup>56</sup>, mapping `mgi_symbol` from the `mmusculus_gene_ensembl` database to `hgnc_symbol`  
951 from the `hsapien_gene_ensembl` database. We added additional ortholog pairs from HomoloGene  
952 (<https://ftp.ncbi.nih.gov/pub/HomoloGene/build37.2/homologene.data>) to obtain a total of 22,578 human  
953 to mouse gene ortholog pairs. We represented this map as a matrix, with mouse genes as rows, human  
954 genes as columns, and values in  $\{0,1\}$  assigned to denote whether a mouse gene maps to a human  
955 gene. We then normalized the matrix to have each column sum to one, effectively creating a count-  
956 preserving probabilistic map from  $d$  mouse to  $D$  human genes  $M \in \mathbb{R}^{D \times d}$ . Mapping from mouse to  
957 human genes is then performed with matrix multiplication:  $U_{\text{human}} = MU_{\text{mouse}}$ . Note that while the mouse  
958 gene expression matrix  $U_{\text{mouse}}$  contains only integers ( $U_{\text{mouse}} \in \mathbb{Z}^{d \times N}$ ), the many-to-many mapping means  
959 that the mapped human gene expression matrix  $U_{\text{human}}$  may contain non-integers ( $U_{\text{human}} \in \mathbb{R}^{D \times N}$ ). For  
960 any human orthologs that were missing in the mouse expression data, we filled in the expression with  
961 zeroes. We then  $\log(\text{CP10K}+1)$  normalized the query cells.

### 962 ***Preprocessing reference scRNA-seq data***

963 The pancreas reference datasets were each sequenced with a different technology: Fluidigm C1  
964 (n=638 cells), CEL-seq (946 cells), CEL-seq2 (2,238 cells), Smart-seq2 (2,355 cells). We obtained the  
965  $\log(1+\text{CP10K})$  normalized data from the Harmony publication<sup>17</sup>. The pancreas cells were previously  
966 assigned across 9 types within each dataset individually according to cluster-specific expression of  
967 marker genes: alpha (*GCG*), beta (*MAFA*), gamma (*PPY*), delta (*SST*), acinar (*PRSS1*), ductal

968 (*KRT19*), endothelial (*CDH5*), stellate (*COL1A2*), and immune (*PTPRC*). We removed 290 cells that  
969 were left unassigned as part of ambiguous or outlier clusters during within-dataset annotation, leaving  
970 5,887 reference cells.

971 We benchmarked three reference mapping methods as follows:

### 972 ***Symphony mapping onto a Harmony reference***

973 We calculated the top 1,000 variable genes within each of the four reference dataset separately using  
974 VST then pooled them (total 2,236 variable genes) for PCA. For reference integration, we ran Harmony  
975 on the top 20 PCs, harmonizing over 'donor' ( $\theta = 2$ ) and 'technology' ( $\theta = 4$ ), with  $\tau = 5$ . For Symphony  
976 mapping, we specified query 'donor', 'species', and 'technology' covariates.

977 As a comparison with *de novo* integration, we ran Harmony integration on all 5 datasets together. We  
978 pooled the top 1,000 variable genes within each dataset (total 2,650 genes), calculated the top 20 PCs,  
979 and harmonized over 'species' ( $\theta = 2$ ), 'donor' ( $\theta = 2$ ), and 'technology' ( $\theta = 2$ ).

### 980 ***Seurat v4 mapping onto a Seurat reference***

981 We ran Seurat version 4 (beta)<sup>30</sup> (Seurat\_3.9.9.9024) and followed the steps from the author's tutorial  
982 (<https://satijalab.org/seurat/v3.2/integration.html>) to integrate the reference datasets given that the  
983 *FindIntegrationAnchors* and *IntegrateData* functions for *de novo* integration are equivalent between  
984 Seurat v3 and v4 to our understanding. We used the same 2,236 variable genes as above and 20 PCs.  
985 We followed the tutorial ([https://satijalab.org/seurat/v4.0/reference\\_mapping.html](https://satijalab.org/seurat/v4.0/reference_mapping.html)) to map each donor  
986 dataset from the query individually. We used the *FindTransferAnchors* function with `reduction =`  
987 `'pca'` and *MapQuery* function with `reference.reduction = 'pca'` (as the documentation  
988 recommends for unimodal analysis).

989 As a comparison with *de novo* integration, we ran Seurat v3/4 integration (*FindIntegrationAnchors* and  
990 *IntegrateData*) on all 5 datasets (integrating over plate-based technologies and Baron donors as  
991 batches) with the same 2,650 variable genes as above.

## 992 ***scArches mapping onto a trVAE reference***

993 We ran scArches<sup>28</sup> version 0.3 with trVAE<sup>33</sup> using default parameters provided in the authors'  
994 notebooks (<https://github.com/theislab/scarches/tree/master/notebooks>). For the pancreas analysis, we  
995 only had access to normalized expression data and therefore ran scArches with trVAE using the mse  
996 reconstruction loss function. We included query batch information in the `condition_key` parameter.  
997 As a comparison with *de novo* integration, we ran trVAE on all 5 datasets with default parameters,  
998 specifying batch as 'dataset' for the 4 plate-based datasets and 'donor' for the Baron et al. dataset.

## 999 ***Evaluation metrics***

000 We used the resulting joint (reference and query) cell embedding to predict query cell types from  
001 reference cells using a 5-NN classifier and calculated cell type prediction F1 scores, as described  
002 above. Note that for the cell type prediction and cell type F1 score calculation, we excluded query  
003 Schwann cells from the accuracy metrics because that cell type is not present in the reference.

004 To assess degree of mixing, we calculated ref\_query LISI and query donor LISI on query cell  
005 neighborhoods using the `compute_lisi` function as above. ref\_query LISI measures how well the  
006 reference and query datasets are mixed (max ref\_query LISI = 2), whereas query donor LISI measures  
007 how well the individual donors within the query dataset are mixed (max = 6).

008 We measured mapping runtime and corresponding *de novo* integration runtime for each method as  
009 elapsed time starting from gene expression. Symphony and Seurat were run in interactive Jupyter  
010 notebooks on a Linux server (Intel Xeon E5-2690 v.3 processors), whereas scArches/trVAE was run on  
011 GPUs (graphics card GP100GL [Tesla P100 PCIe 16GB]) to speed up runtime.

## 012 **2.3 Fetal liver hematopoiesis trajectory inference example**

013 We obtained post-filtered, post-doublet removal data directly from the authors<sup>46</sup> along with author-  
014 defined cell type annotations for 113,063 cells sequenced with 10x 3' end bias and a separate 25,367  
015 cells sequenced with 10x 5' end bias. For building the harmonized reference from all 3' cells, we

016 followed the same variable gene selection procedures as the original authors, using the Seurat  
017 variance/mean ratio (VMR) method with parameters  $\text{min\_expr} = .0125$ ,  $\text{max\_expr} = 3$ , and  
018  $\text{min\_dispersion} = 0.625$  (resulting in 1,917 variable genes). For each of 14 held-out donor experiments  
019 within the 3' dataset, we integrated the reference with Harmony on 13 donors ( $\theta = 3$ ). During Symphony  
020 mapping, we specified query 'donor' covariate. For mapping 5' cells against a 3' reference, we removed  
021 two donors (F2 and F5,  $n=3,953$ ) from the 5' query based on low library complexity (**Fig. S5b**), leaving  
022  $n=21,414$  cells from 5 donors. We integrated the reference (all 14 donors sequenced with 3' end bias)  
023 with Harmony over 'donor' ( $\theta = 3$ ). During Symphony mapping, we specified both 'donor' and  
024 'technology' as covariates. We predicted query cell types by transferring reference cell type annotations  
025 using the *knn* function in the 'class' R package ( $k=30$ ). We visualized the aggregated confusion matrix  
026 across all 14 held-out donor experiments as well as the confusion matrix for the single 5'-to-3'  
027 experiment using ComplexHeatmap R package<sup>57</sup>.

028 For the trajectory inference analysis, we obtained trajectory coordinates from the force directed graph  
029 (FDG) embedding of all 3'-sequenced cells from the original authors<sup>46</sup>, forming a reference trajectory.  
030 We restricted the trajectory to immune cell types only (excluding hepatocytes, fibroblasts, and  
031 endothelial). We then mapped a subset of the query cells belonging to the MEM lineage (MEMPs,  
032 megakaryocytes, mast cells, early-late erythroid;  $n=5,141$ ) to the reference-defined trajectory by  
033 averaging the FDG coordinates of the 10 reference immune cell neighbors in the Symphony  
034 embedding.

## 035 2.4 Memory T cell surface protein inference example

036 We used a memory T cell CITE-seq dataset collected from a tuberculosis disease progression cohort of  
037 259 individuals of admixed Peruvian ancestry<sup>40</sup>. The dataset includes expression of the whole  
038 transcriptome (33,538 genes) and 30 surface protein markers from 500,089 memory T cells isolated  
039 from PBMCs. Including technical replicates, 271 samples were processed across 46 batches.

040 To assess protein prediction accuracy using Symphony embeddings, we randomly selected 217  
041 samples (411,004 cells), normalized the expression of each gene ( $\log_2(\text{CP10K})$ ) and built a Symphony

042 reference based on mRNA expression, correcting for donor and batch. The held-out 54 samples  
043 comprised the query that we mapped onto the reference. We predicted the expression of each of the 30  
044 surface proteins in each of the query cells by averaging the protein's expression across the cell's 50  
045 nearest reference neighbors. Nearest neighbors were defined based on Euclidean distance in the  
046 batch-corrected low-dimensional embedding. As a ground truth for each protein in each query cell, we  
047 computed a smoothed estimate of the cells' measured protein expression by averaging the protein's  
048 expression across the cell's 50 nearest neighbors in the batch-corrected complete PCA embedding of  
049 all 259 donors. We did not use the cells' raw measured protein expression due to dropout. We  
050 computed the Pearson correlation coefficient between our predicted expression and the ground truth  
051 expression across all cells per donor for each marker.

052 To assess protein prediction accuracy based on mapping to a joint mRNA and protein-based  
053 Symphony reference, we first built an integrated reference by using canonical correlation analysis  
054 (CCA) to project cells into a low-dimensional embedding maximizing correlation between mRNA and  
055 protein features. We randomly selected 217 samples (395,373 cells) to comprise this reference, and  
056 normalized the expression of each gene ( $\log_2(\text{CP10K})$ ), selected the top 2,865 most variable genes,  
057 and scaled (mean = 0, variance = 1) all mRNA and protein features. We computed 20 canonical  
058 variates (CVs) with the *cc* function in the CCA R package<sup>58</sup> and corrected the mRNA CVs for donor and  
059 batch effects with Harmony. Then, we used Symphony to construct a reference based on the batch-  
060 corrected CVs, gene loadings on each CV, and mean and standard deviation used to scale each gene  
061 prior to CCA. The held-out 54 samples comprised the query that we mapped onto the reference. As  
062 described above, we predicted the expression of each of the 30 surface proteins in each of the query  
063 cells based on the cell's 5, 10, or 50 nearest neighbors in the reference, estimated the smoothed  
064 ground truth expression of each protein in each query cell (now based on the batch-corrected CCA  
065 embedding of all 259 donors) and computed the Pearson correlation coefficient for each marker.

## 066 2.5 Visualization

067 For visualizing the embeddings using UMAP<sup>59</sup> (and included as the default in Symphony), we used the  
068 'uwot' R package with the following parameters: `n_neighbors=30`, `learning_rate=0.5`, `init = 'laplacian'`,  
069 `metric = 'cosine'`, `min_dist=0.1` (except `min_dist=0.3` for pancreas and fetal liver examples). For each  
070 Symphony reference, we saved the uwot model at the time of UMAP using the `uwot::save_uwot`  
071 function and saved the path to the model file as part of the Symphony reference object. Saving the  
072 reference UMAP model allows for the fast projection of new query cells into reference UMAP space  
073 from the query embedding from Symphony mapping using the function `uwot::transform`.

074 For the pancreas benchmarking, we computed a *de novo* UMAP embedding on the joint reference and  
075 query embedding because a UMAP projection can potentially obscure differences between the  
076 projected data and dataset used to construct the UMAP model. For general purposes, we recommend  
077 UMAP projection when the reference cell UMAP coordinates are desired to remain stable.

078 To distinguish the reference plots from query plots, we visually present the reference embedding as a  
079 contour density instead of individual cells. The density plots were generated using ggplot2 function  
080 `stat_density_2d` with `geom = 'polygon'` and `contour_var = 'ndensity'`. We provide custom functions to  
081 generate these plots as part of the Symphony package.

## 082 2.6 Runtime scalability analysis

083 We downsampled a large memory T cell dataset<sup>40</sup> to create benchmark reference datasets with 20,000,  
084 50,000, 100,000, 250,000, and 500,000 cells. For each, we built a reference (20 PCs, 100 centroids)  
085 integrating over 'donor' and mapped three different-sized queries: 1,000, 10,000, and 100,000 cells. To  
086 isolate the separate effects of number of query cells and number of query batches on mapping time, we  
087 mapped against the 50,000-cell reference: (1) varying the number of query cells (from 1,000 to 10,000  
088 cells) while keeping the number of donors constant and (2) varying the number of query donors (6 to  
089 120 donors) while keeping the number of cells constant (randomly sampling 10,000 cells). We also  
090 performed separate experiments varying the number of reference centroids (25 to 400) and number of  
091 dimensions (10 to 320 PCs) while keeping all other parameters constant. We ran all jobs on Linux

092 servers allotted 4 cores and 64 GB of memory (Intel Xeon E5-2690 v.3 processors) and used the  
093 *system.time* R function to measure elapsed time.

## 094 Data availability

095 Datasets for all analyses were obtained from the links in **Table S1**. All datasets are publicly available  
096 except the memory T cell CITE-seq data, which will be available at GEO accession GSE158769.

## 097 Code availability

098 We provide an efficient implementation of Symphony at <https://github.com/immunogenomics/symphony>  
099 along with documentation, tutorials, and pre-built references. Scripts reproducing figures for all  
100 examples will be made available at [https://github.com/immunogenomics/symphony\\_reproducibility](https://github.com/immunogenomics/symphony_reproducibility).

## 101 References

- 102 1. Klein, A. M. & Treutlein, B. Single cell analyses of development in the modern era. *Development*  
103 **146**, (2019).
- 104 2. Han, X. *et al.* Construction of a human cell landscape at single-cell level. *Nature* (2020)  
105 doi:10.1038/s41586-020-2157-4.
- 106 3. Svensson, V., da Veiga Beltrame, E. & Pachter, L. A curated database reveals trends in single-cell  
107 transcriptomics. *Database* **2020**, (2020).
- 108 4. Cao, J. *et al.* The single-cell transcriptional landscape of mammalian organogenesis. *Nature* **566**,  
109 496–502 (2019).
- 110 5. Jerber, J. *et al.* Population-scale single-cell RNA-seq profiling across dopaminergic neuron  
111 differentiation. *bioRxiv* 2020.05.21.103820 (2020) doi:10.1101/2020.05.21.103820.
- 112 6. Zhang, F. *et al.* Defining inflammatory cell states in rheumatoid arthritis joint synovial tissues by  
113 integrating single-cell transcriptomics and mass cytometry. *Nat. Immunol.* **20**, 928–942 (2019).
- 114 7. Reyes, M. *et al.* An immune-cell signature of bacterial sepsis. *Nat. Med.* **26**, 333–340 (2020).



- 115 8. Kotliarov, Y. *et al.* Broad immune activation underlies shared set point signatures for vaccine  
116 responsiveness in healthy individuals and disease activity in patients with lupus. *Nat. Med.* **26**,  
117 618–629 (2020).
- 118 9. Schafflick, D. *et al.* Integrated single cell analysis of blood and cerebrospinal fluid leukocytes in  
119 multiple sclerosis. *Nat. Commun.* **11**, 247 (2020).
- 120 10. Smillie, C. S. *et al.* Intra- and Inter-cellular Rewiring of the Human Colon during Ulcerative Colitis.  
121 *Cell* **178**, 714-730.e22 (2019).
- 122 11. Litviňuková, M. *et al.* Cells of the adult human heart. *Nature* (2020) doi:10.1038/s41586-020-2797-  
123 4.
- 124 12. Rozenblatt-Rosen, O., Stubbington, M. J. T., Regev, A. & Teichmann, S. A. The Human Cell Atlas:  
125 from vision to reality. *Nature* **550**, 451–453 (2017).
- 126 13. Haghverdi, L., Lun, A. T. L., Morgan, M. D. & Marioni, J. C. Batch effects in single-cell RNA-  
127 sequencing data are corrected by matching mutual nearest neighbors. *Nat. Biotechnol.* **36**, 421–  
128 427 (2018).
- 129 14. Hie, B., Bryson, B. & Berger, B. Efficient integration of heterogeneous single-cell transcriptomes  
130 using Scanorama. *Nat. Biotechnol.* **37**, 685–691 (2019).
- 131 15. Welch, J. D. *et al.* Single-Cell Multi-omic Integration Compares and Contrasts Features of Brain  
132 Cell Identity. *Cell* **177**, 1873-1887.e17 (2019).
- 133 16. Lopez, R., Regier, J., Cole, M. B., Jordan, M. I. & Yosef, N. Deep generative modeling for single-  
134 cell transcriptomics. *Nat. Methods* **15**, 1053–1058 (2018).
- 135 17. Korsunsky, I. *et al.* Fast, sensitive and accurate integration of single-cell data with Harmony. *Nat.*  
136 *Methods* **16**, 1289–1296 (2019).
- 137 18. Stuart, T. *et al.* Comprehensive Integration of Single-Cell Data. *Cell* **177**, 1888-1902.e21 (2019).
- 138 19. He, Z., Brazovskaja, A., Ebert, S., Camp, J. G. & Treutlein, B. CSS: cluster similarity spectrum  
139 integration of single-cell genomics data. *Genome Biol.* **21**, 224 (2020).
- 140 20. Tran, H. T. N. *et al.* A benchmark of batch-effect correction methods for single-cell RNA  
141 sequencing data. *Genome Biol.* **21**, 12 (2020).



- 142 21. Zhang, Q. *et al.* Landscape and Dynamics of Single Immune Cells in Hepatocellular Carcinoma.  
143 *Cell* **179**, 829-845.e20 (2019).
- 144 22. Wei, K. *et al.* Notch signalling drives synovial fibroblast identity and arthritis pathology. *Nature* **582**,  
145 259–264 (2020).
- 146 23. Kirita, Y., Wu, H., Uchimura, K., Wilson, P. C. & Humphreys, B. D. Cell profiling of mouse acute  
147 kidney injury reveals conserved cellular responses to injury. *Proc. Natl. Acad. Sci. U. S. A.* **117**,  
148 15874–15883 (2020).
- 149 24. Sandu, I. *et al.* Landscape of Exhausted Virus-Specific CD8 T Cells in Chronic LCMV Infection.  
150 *Cell Rep.* **32**, 108078 (2020).
- 151 25. Korsunsky, I. *et al.* Cross-tissue, single-cell stromal atlas identifies shared pathological fibroblast  
152 phenotypes in four chronic inflammatory diseases. *bioRxiv* 2021.01.11.426253 (2021).
- 153 26. Zhang, F. *et al.* IFN-  $\gamma$  and TNF-  $\alpha$  drive a CXCL10 + CCL2 + macrophage phenotype expanded in  
154 severe COVID-19 and other diseases with tissue inflammation. *bioRxiv* (2020)  
155 doi:10.1101/2020.08.05.238360.
- 156 27. Lähnemann, D. *et al.* Eleven grand challenges in single-cell data science. *Genome Biol.* **21**, 31  
157 (2020).
- 158 28. Lotfollahi, M. *et al.* Query to reference single-cell integration with transfer learning. *bioRxiv* (2020).
- 159 29. Cao, Z.-J., Wei, L., Lu, S., Yang, D.-C. & Gao, G. Searching large-scale scRNA-seq databases via  
160 unbiased cell embedding with Cell BLAST. *Nat. Commun.* **11**, 3458 (2020).
- 161 30. Hao, Y. *et al.* Integrated analysis of multimodal single-cell data. *bioRxiv* 2020.10.12.335331 (2020).
- 162 31. Kiselev, V. Y., Yiu, A. & Hemberg, M. scmap: projection of single-cell RNA-seq data across data  
163 sets. *Nat. Methods* **15**, 359–362 (2018).
- 164 32. Xu, C. *et al.* Probabilistic harmonization and annotation of single-cell transcriptomics data with  
165 deep generative models. *Mol. Syst. Biol.* **17**, e9620 (2021).
- 166 33. Lotfollahi, M., Naghipourfar, M., Theis, F. J. & Wolf, F. A. Conditional out-of-distribution generation  
167 for unpaired data using transfer VAE. *Bioinformatics* **36**, i610–i617 (2020).

- 168 34. Polański, K. *et al.* BBKNN: fast batch alignment of single cell transcriptomes. *Bioinformatics* **36**,  
169 964–965 (2020).
- 170 35. Abdelaal, T. *et al.* A comparison of automatic cell identification methods for single-cell RNA  
171 sequencing data. *Genome Biol.* **20**, 194 (2019).
- 172 36. Zhang, Z. *et al.* SCINA: A Semi-Supervised Subtyping Algorithm of Single Cells and Bulk Samples.  
173 *Genes* **10**, (2019).
- 174 37. Alquicira-Hernandez, J., Sathe, A., Ji, H. P., Nguyen, Q. & Powell, J. E. scPred: accurate  
175 supervised method for cell-type classification from single-cell RNA-seq data. *Genome Biol.* **20**, 264  
176 (2019).
- 177 38. Tan, Y. & Cahan, P. SingleCellNet: A Computational Tool to Classify Single Cell RNA-Seq Data  
178 Across Platforms and Across Species. *Cell Syst* **9**, 207-213.e2 (2019).
- 179 39. Ding, J. *et al.* Systematic comparative analysis of single cell RNA-sequencing methods. *bioRxiv*  
180 632216 (2019) doi:10.1101/632216.
- 181 40. Nathan, A. *et al.* Multimodal memory T cell profiling identifies a reduction in a polyfunctional Th17  
182 state associated with tuberculosis progression. *bioRxiv* 2020.04.23.057828 (2020)  
183 doi:10.1101/2020.04.23.057828.
- 184 41. Segerstolpe, Å. *et al.* Single-Cell Transcriptome Profiling of Human Pancreatic Islets in Health and  
185 Type 2 Diabetes. *Cell Metab.* **24**, 593–607 (2016).
- 186 42. Lawlor, N. *et al.* Single-cell transcriptomes identify human islet cell signatures and reveal cell-type-  
187 specific expression changes in type 2 diabetes. *Genome Res.* **27**, 208–222 (2017).
- 188 43. Grün, D. *et al.* De Novo Prediction of Stem Cell Identity using Single-Cell Transcriptome Data. *Cell*  
189 *Stem Cell* **19**, 266–277 (2016).
- 190 44. Muraro, M. J. *et al.* A Single-Cell Transcriptome Atlas of the Human Pancreas. *Cell Syst* **3**, 385-  
191 394.e3 (2016).
- 192 45. Baron, M. *et al.* A Single-Cell Transcriptomic Map of the Human and Mouse Pancreas Reveals  
193 Inter- and Intra-cell Population Structure. *Cell Syst* **3**, 346-360.e4 (2016).
- 194 46. Popescu, D.-M. *et al.* Decoding human fetal liver haematopoiesis. *Nature* **574**, 365–371 (2019).

- 195 47. Stoeckius, M. *et al.* Simultaneous epitope and transcriptome measurement in single cells. *Nat.*  
196 *Methods* **14**, 865–868 (2017).
- 197 48. Peterson, V. M. *et al.* Multiplexed quantification of proteins and transcripts in single cells. *Nat.*  
198 *Biotechnol.* **35**, 936–939 (2017).
- 199 49. Luecken, M. D. & Theis, F. J. Current best practices in single-cell RNA-seq analysis: a tutorial. *Mol.*  
200 *Syst. Biol.* **15**, e8746 (2019).
- 201 50. Berger, B. & Cho, H. Emerging technologies towards enhancing privacy in genomic data sharing.  
202 *Genome Biol.* **20**, 128 (2019).
- 203 51. Wang, S., Pisco, A. O., Karkanas, J. & Altman, R. B. Unifying single-cell annotations based on the  
204 Cell Ontology. *bioRxiv* 810234 (2019) doi:10.1101/810234.
- 205 52. Gayoso, A. *et al.* A Joint Model of RNA Expression and Surface Protein Abundance in Single Cells.  
206 *bioRxiv* 791947 (2019) doi:10.1101/791947.
- 207 53. Baglama, J. & Reichel, L. Augmented Implicitly Restarted Lanczos Bidiagonalization Methods.  
208 *SIAM Journal on Scientific Computing* vol. 27 19–42 (2005).
- 209 54. Korsunsky, I., Nathan, A., Millard, N. & Raychaudhuri, S. Presto scales Wilcoxon and auROC  
210 analyses to millions of observations. *bioRxiv* 653253 (2019) doi:10.1101/653253.
- 211 55. Friedman, J., Hastie, T. & Tibshirani, R. Regularization Paths for Generalized Linear Models via  
212 Coordinate Descent. *J. Stat. Softw.* **33**, 1–22 (2010).
- 213 56. Durinck, S., Spellman, P. T., Birney, E. & Huber, W. Mapping identifiers for the integration of  
214 genomic datasets with the R/Bioconductor package biomaRt. *Nat. Protoc.* **4**, 1184–1191 (2009).
- 215 57. Gu, Z., Eils, R. & Schlesner, M. Complex heatmaps reveal patterns and correlations in  
216 multidimensional genomic data. *Bioinformatics* **32**, 2847–2849 (2016).
- 217 58. Leurgans, S. E., Moyeed, R. A. & Silverman, B. W. Canonical Correlation Analysis When the Data  
218 are Curves. *J. R. Stat. Soc. Series B Stat. Methodol.* **55**, 725–740 (1993).
- 219 59. McInnes, L., Healy, J. & Melville, J. UMAP: Uniform Manifold Approximation and Projection for  
220 Dimension Reduction. *arXiv [stat.ML]* (2018).
